# Supplementary material for: Maternal education and its influence on child growth and nutritional status during the first two years of life: a systematic review and meta-analysis
Source: PubMed Central journal article supplement (PMC11001623; doi:10.1016/j.eclinm.2024.102574), 2024-04-04

Supplementary 3. Distribution of maternal education levels.

➤ **WAS**

• **Total**

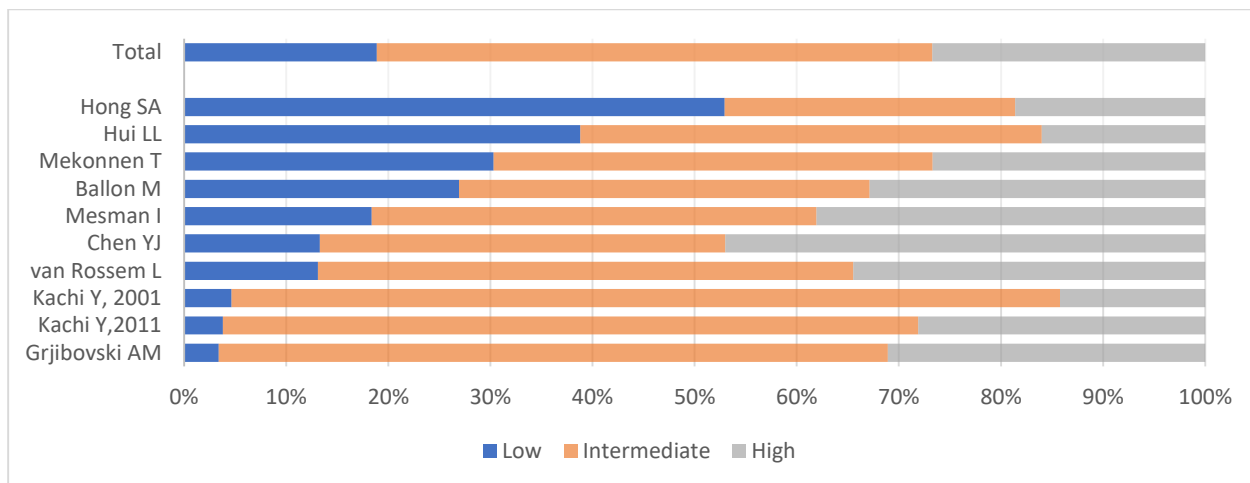

• **Crude**

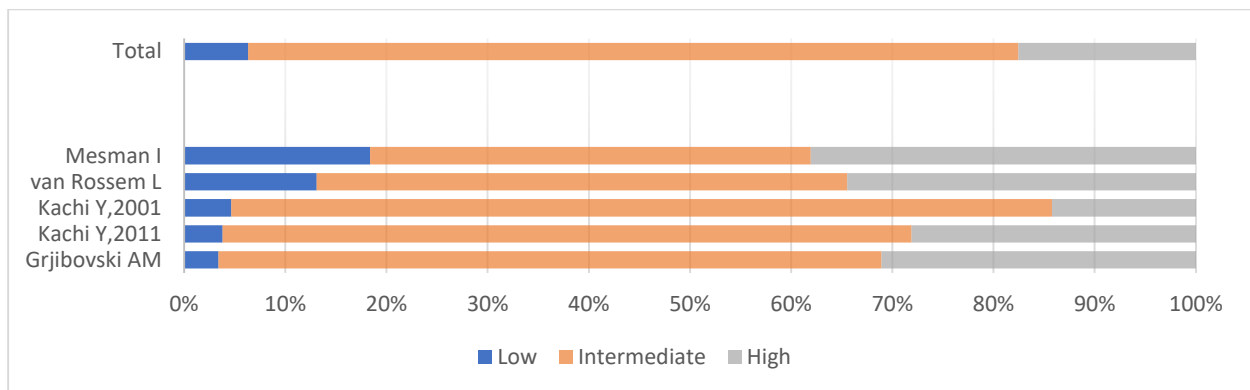

• **Adjusted**

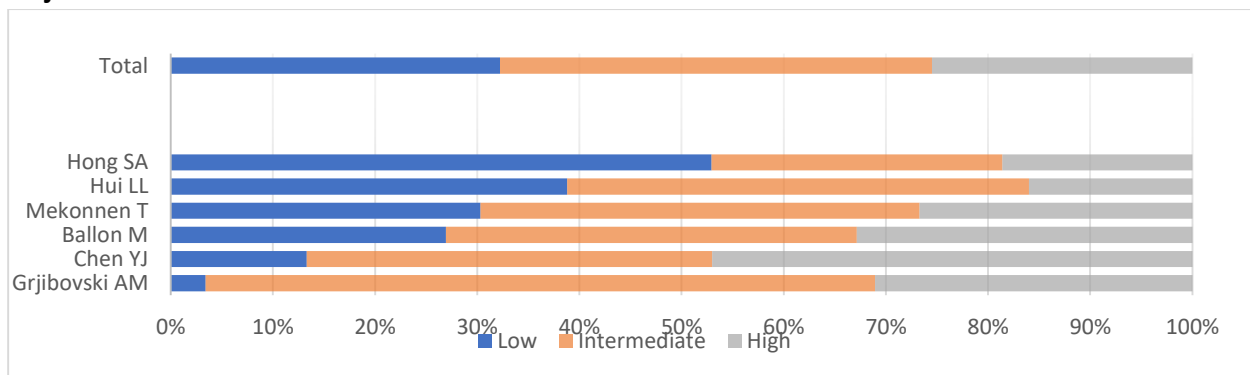

# ➤ HAZ

## ● Total

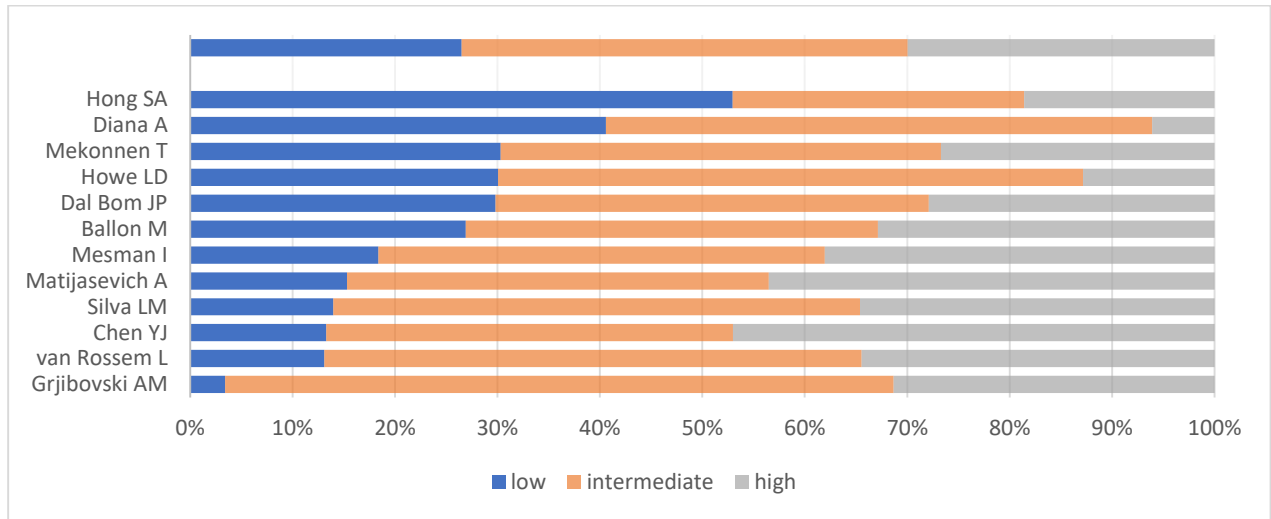

## ● Crude

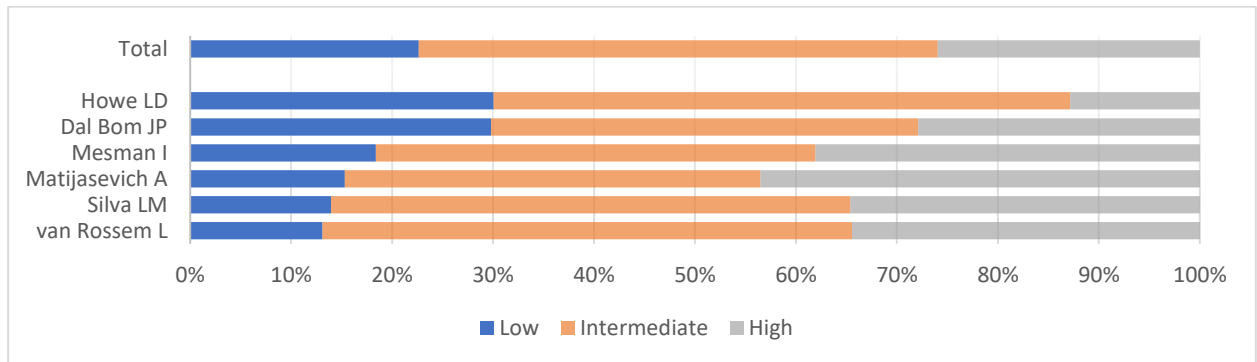

## ● Adjusted

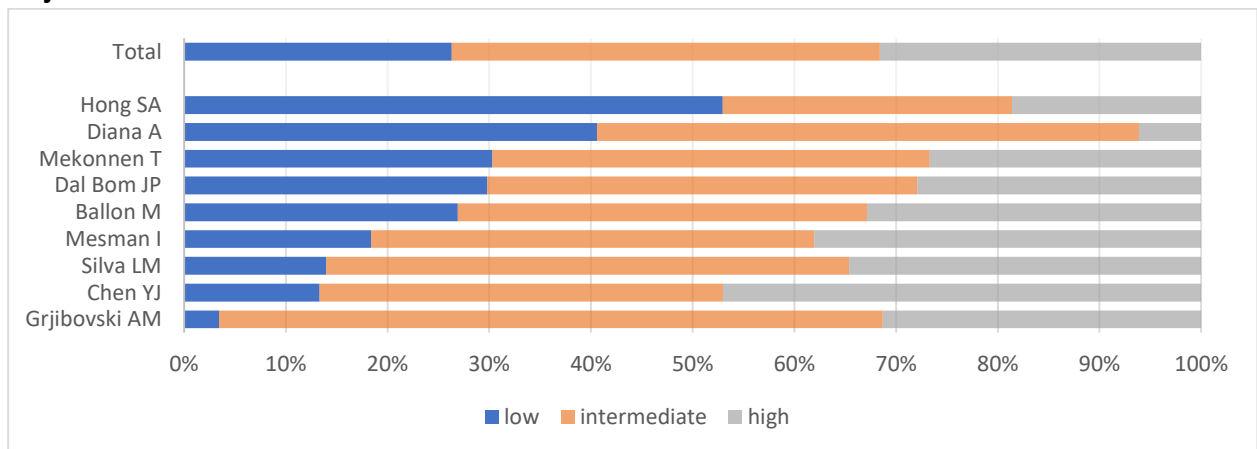

• **Total**

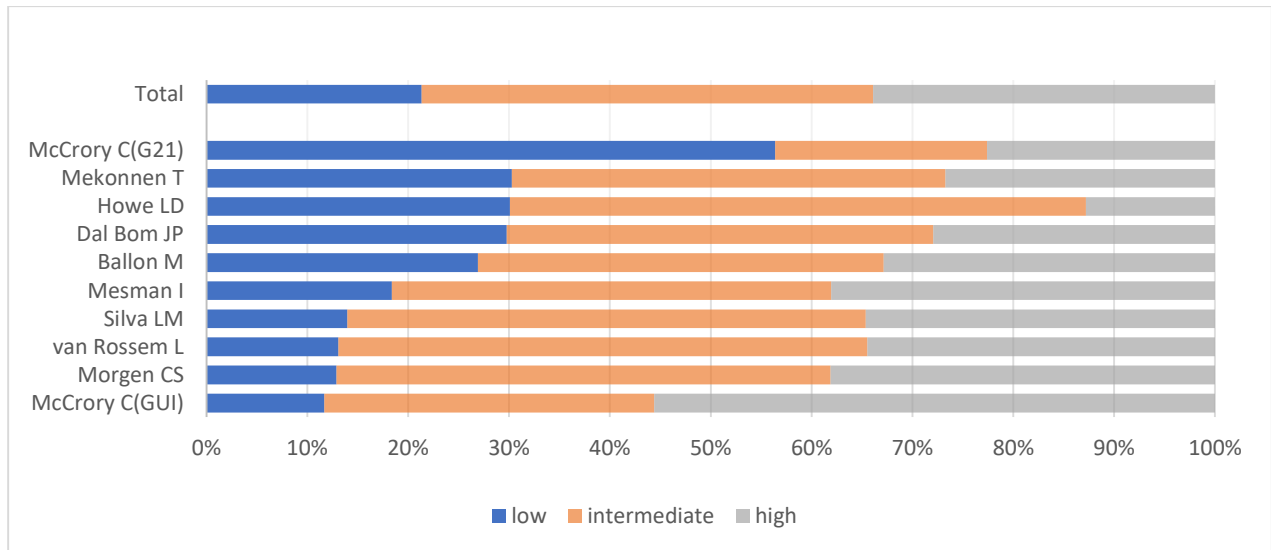

• **Crude**

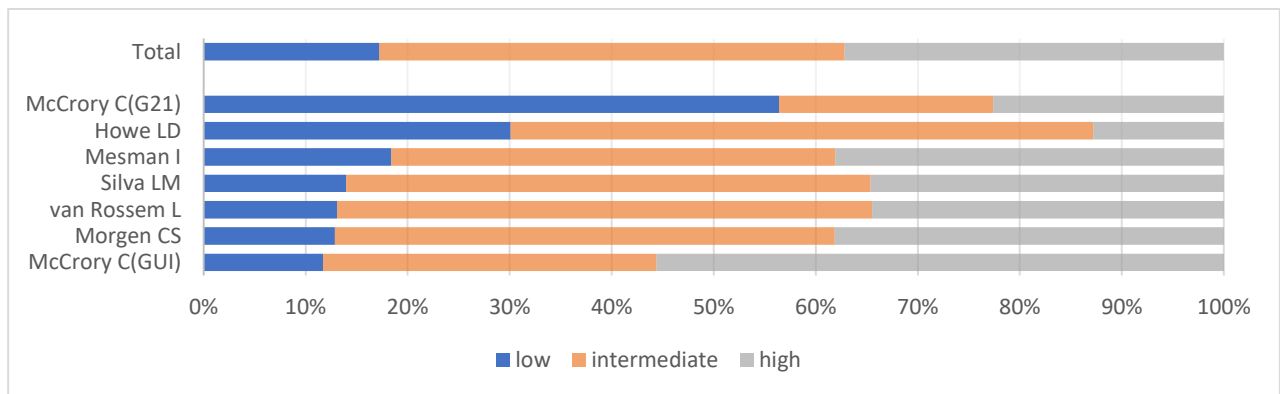

• **Adjusted**

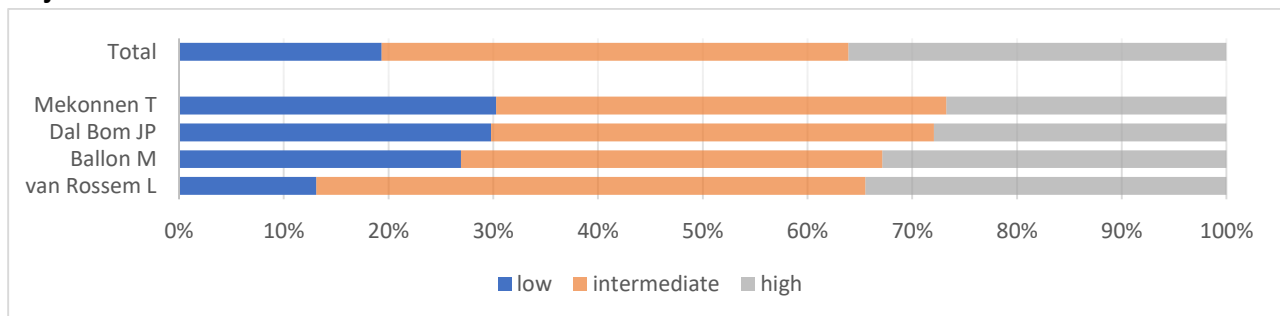

# ➤ Overweight

- Total**

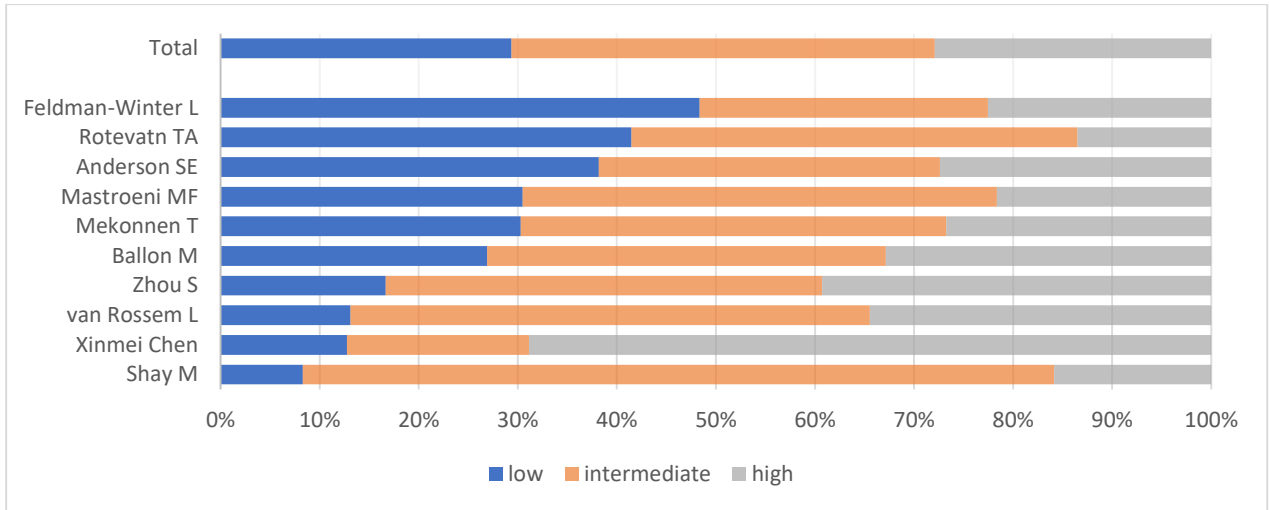

- Crude**

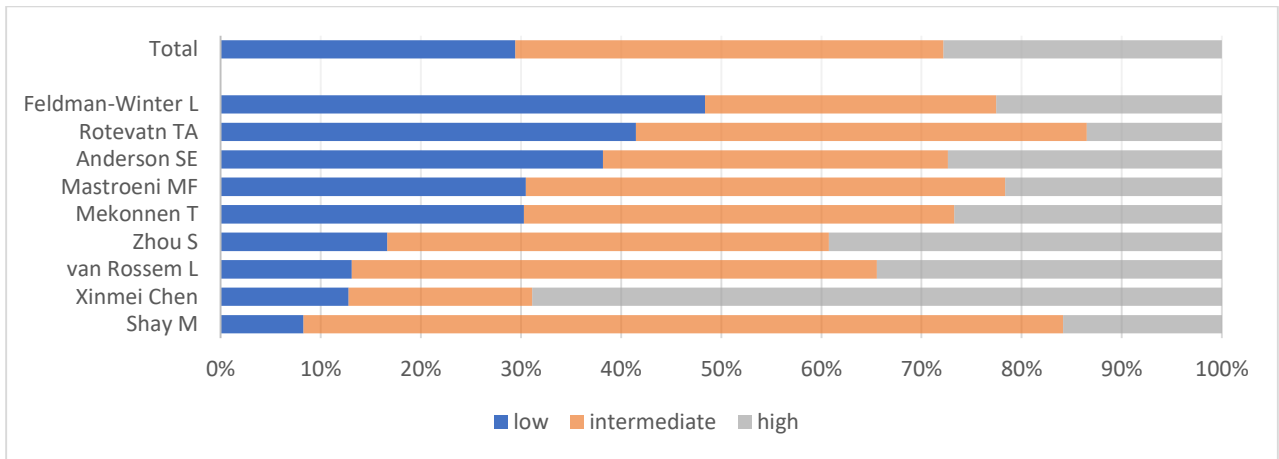

- Adjusted**

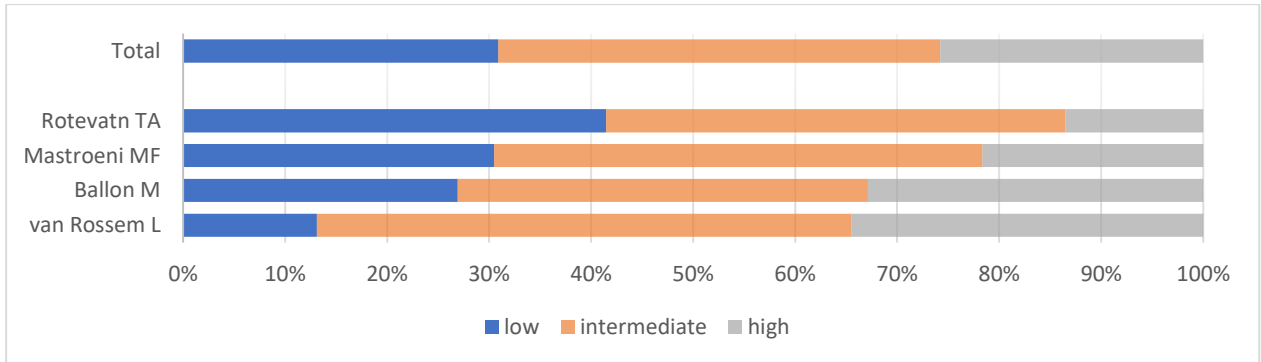

## ➤ Underweight\*

- **Total**

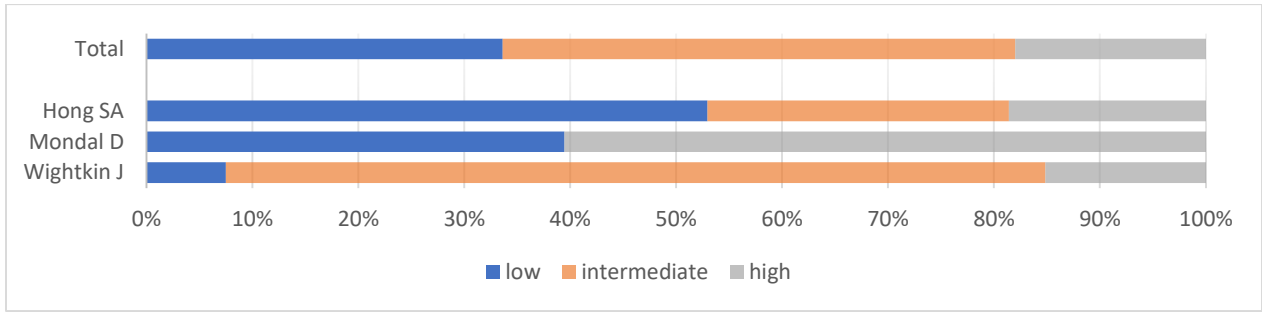

- **Crude**

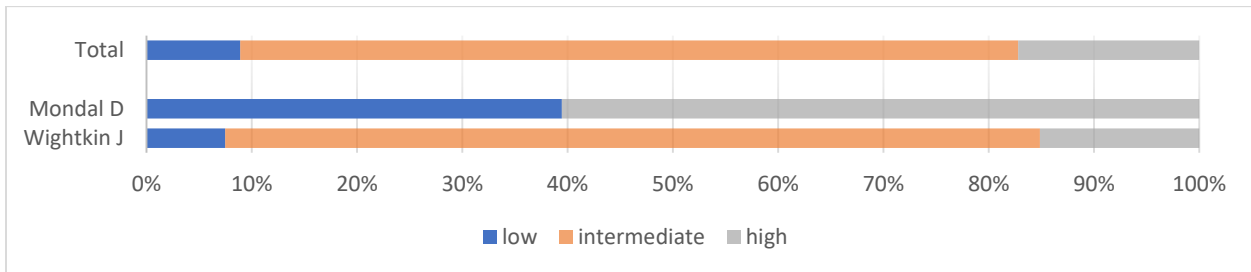

- **Adjusted**

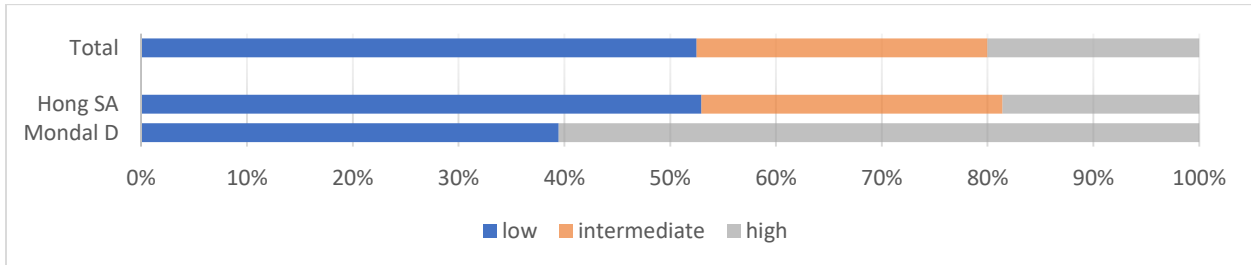

\* We categorized the study by Mamabolo RL et al. as involving a low-educated population, given that the research took place in rural villages situated in the central region of Limpopo Province. These villages are marked by semi-rural environments, limited infrastructure, lack of electricity, insufficient sanitation facilities, poorly maintained roads, and under-resourced schools. Subsistence farming serves as the primary livelihood in these areas.

# ➤ Stunting\*

- Total**

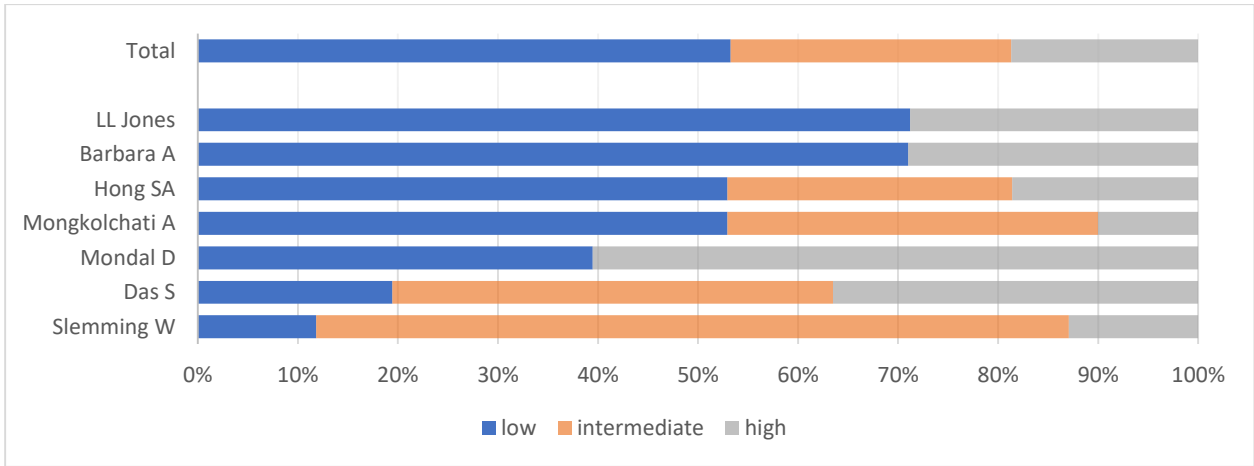

- Crude**

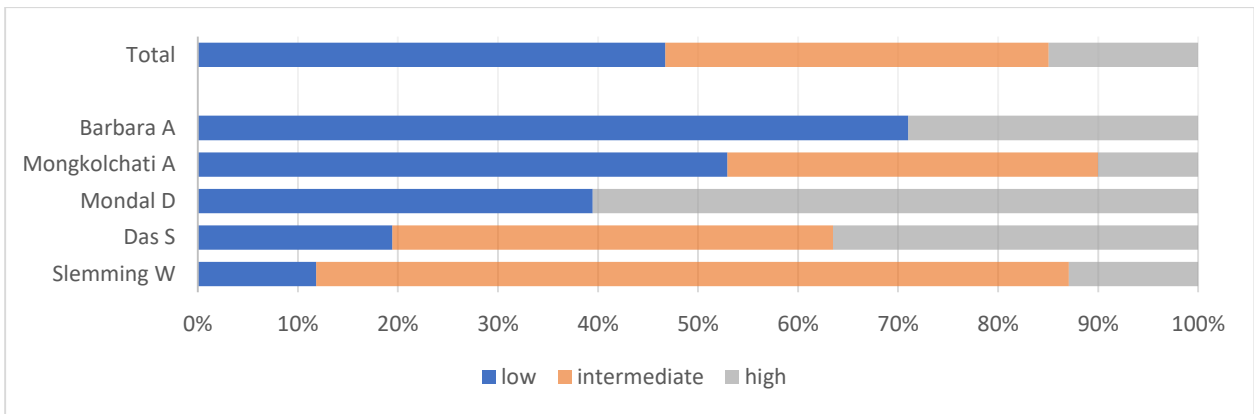

- Adjusted**

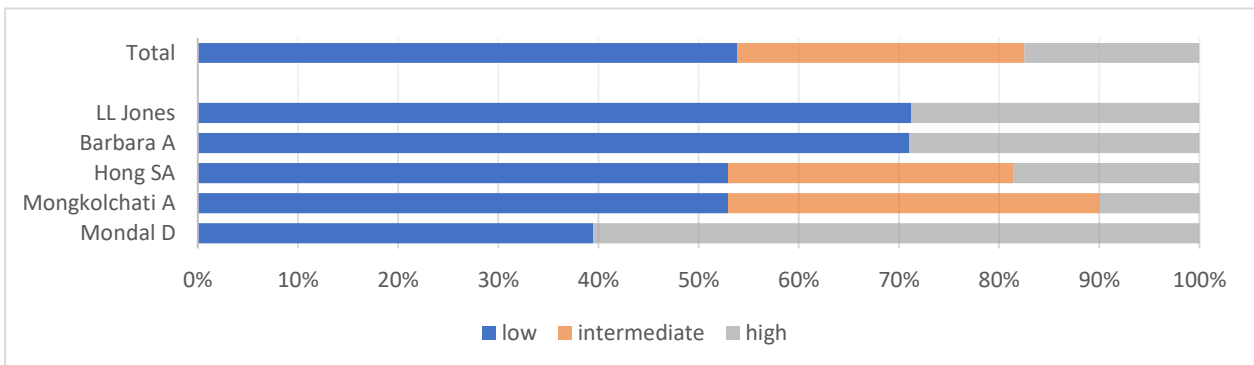

\* We categorized the study by Mamabolo RL et al. as involving a low-educated population, given that the research took place in rural villages situated in the central region of Limpopo Province. These villages are marked by semi-rural environments, limited infrastructure, lack of electricity, insufficient sanitation facilities, poorly maintained roads, and under-resourced schools. Subsistence farming serves as the primary livelihood in these areas.

## ➤ RWG(Crude)

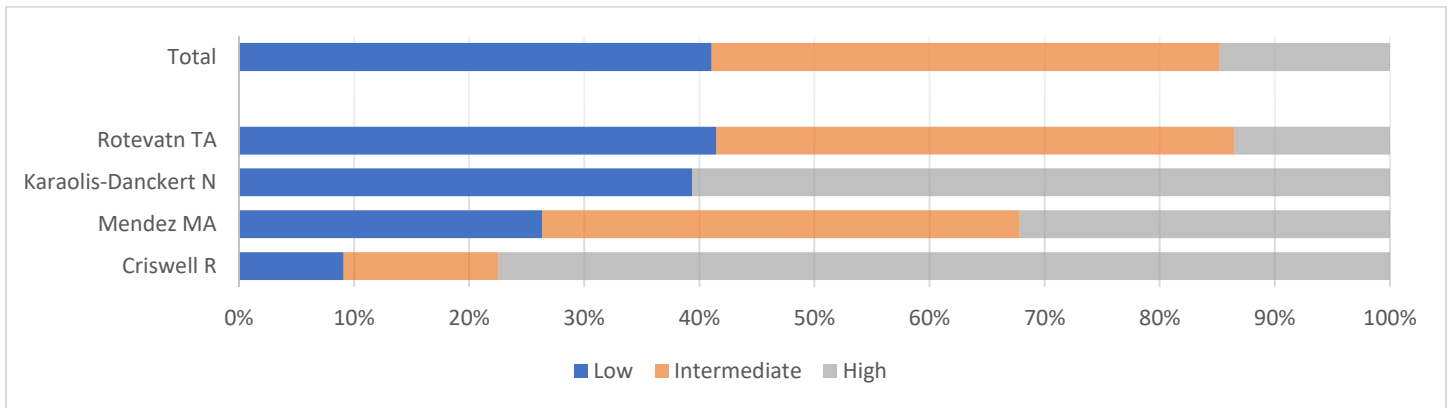

# Clustering the prevalence of low maternal education level

WAZ

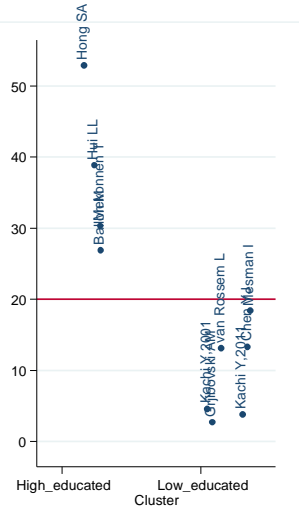

HAZ

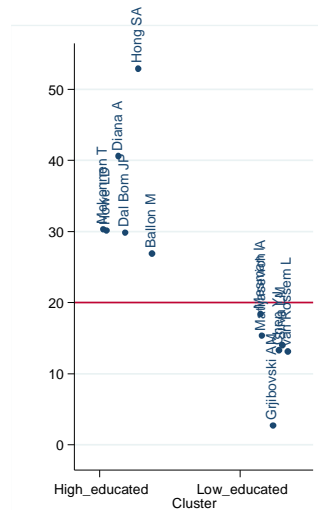

BMI-Z

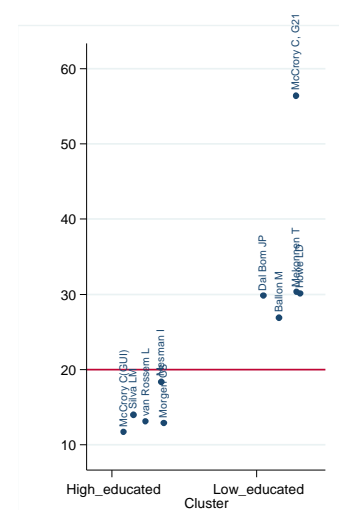

Overweight

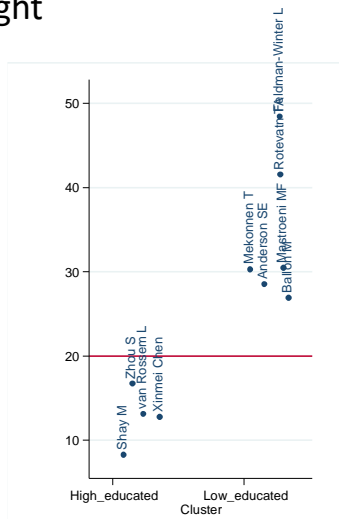

Stunting

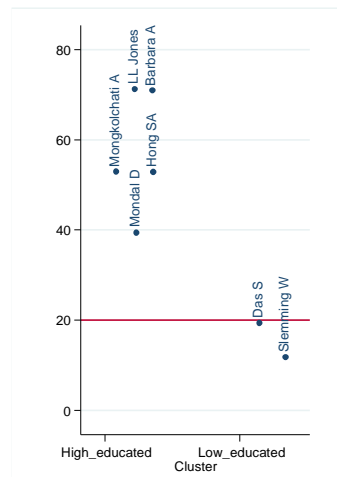

Underweight

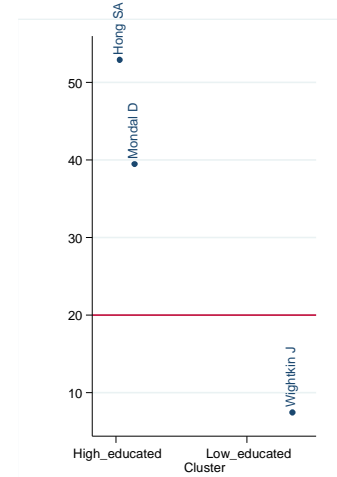

RWG

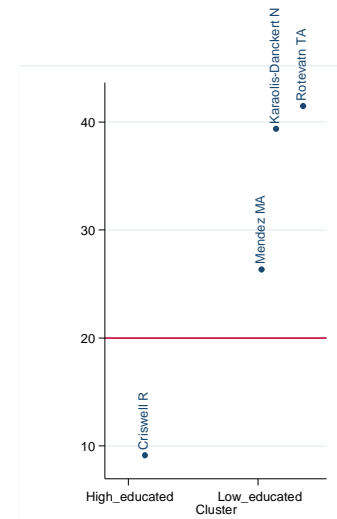

Supplement: mmc3.pdf [file mmc3.pdf]
