# Supplementary material for: Maternal education and its influence on child growth and nutritional status during the first two years of life: a systematic review and meta-analysis
Source: PubMed Central journal article supplement (PMC11001623; doi:10.1016/j.eclinm.2024.102574), 2024-04-04

**Supplementary 6.** The subgroup analysis was performed by A. country income group, B. education status of the country, C. loss to follow-up rate and D. study quality, for evaluating the effect of high vs. low maternal education level on child weight for age z-score (WAZ); height for age z-score (HAZ) ; BMI for age z-scores (BMI Z-score); overweight and E.stunting. Mean difference (MD) and odds ratio (OR) were used as the effect sizes.

➤ **WAZ**

**A**

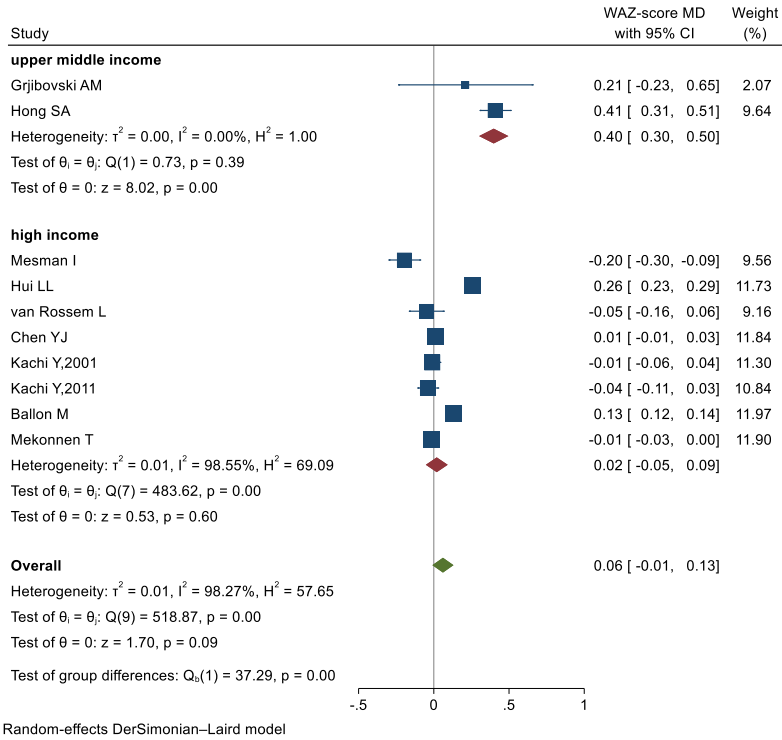

**B**

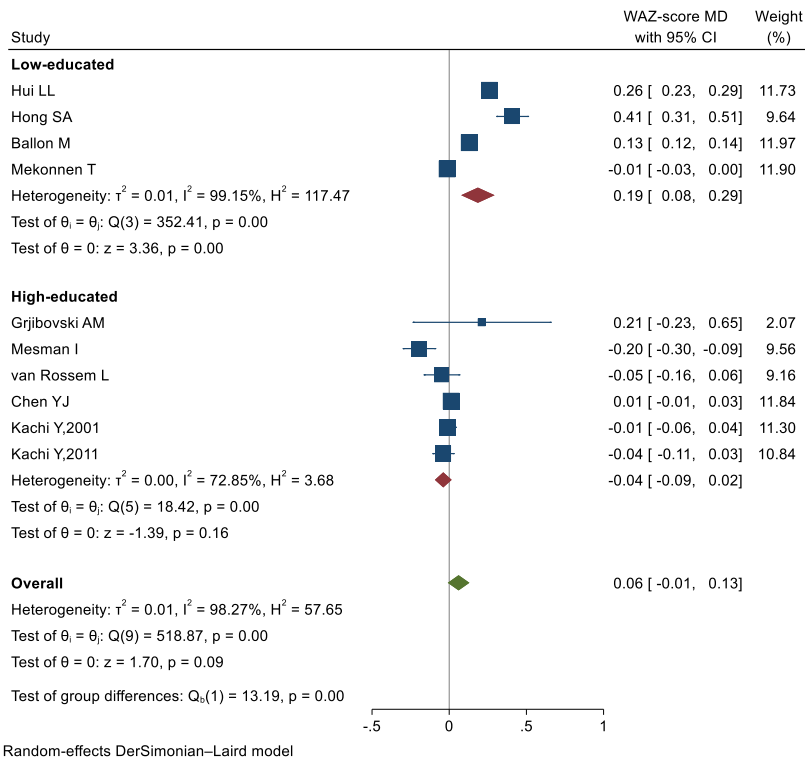

**C**

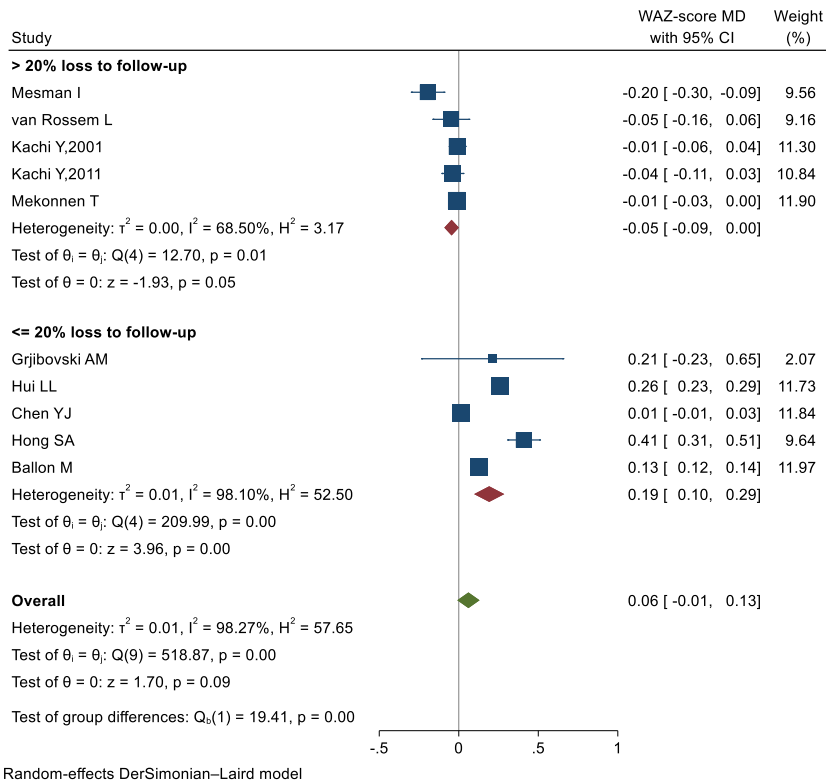

**D**

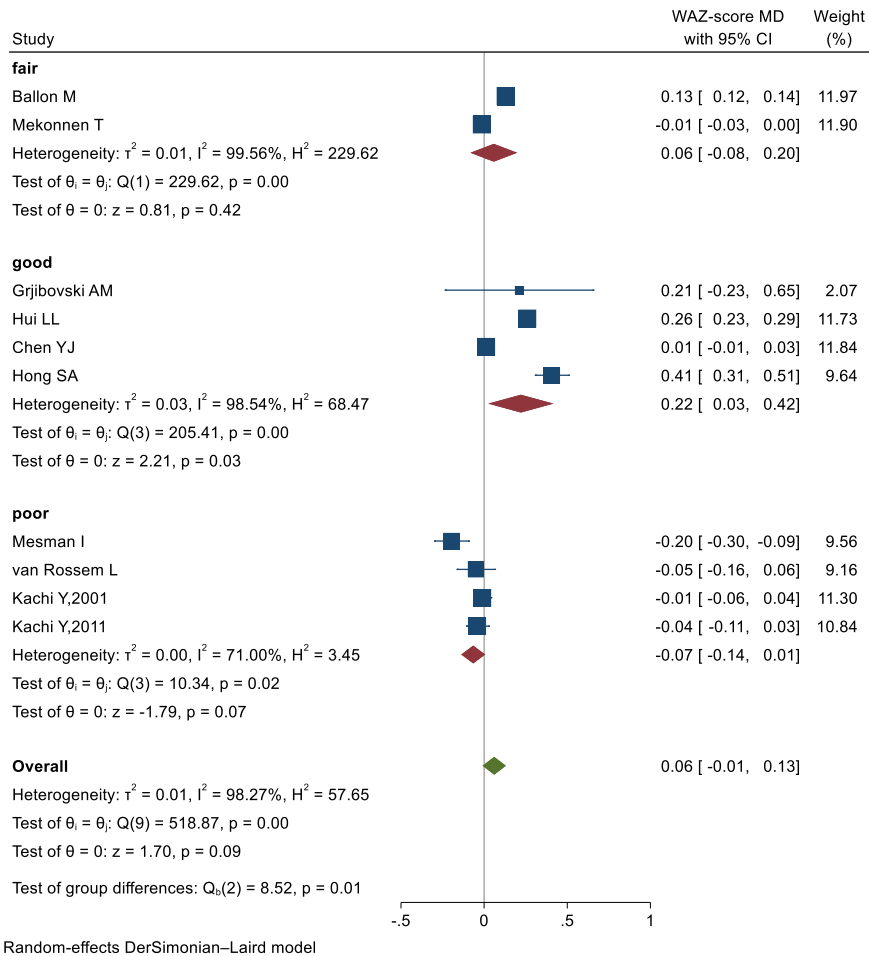

# HAZ

## A

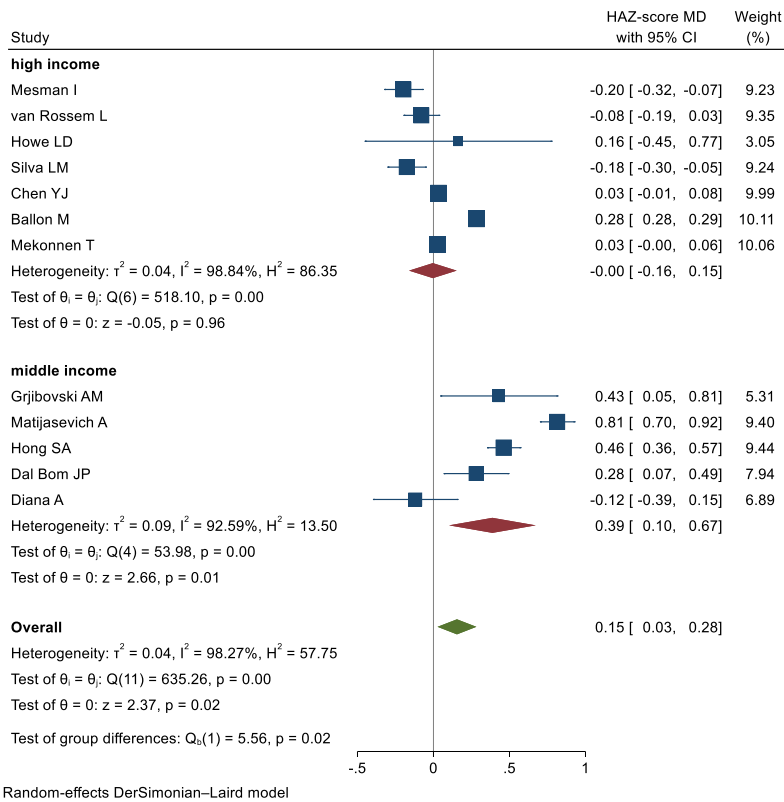

## B

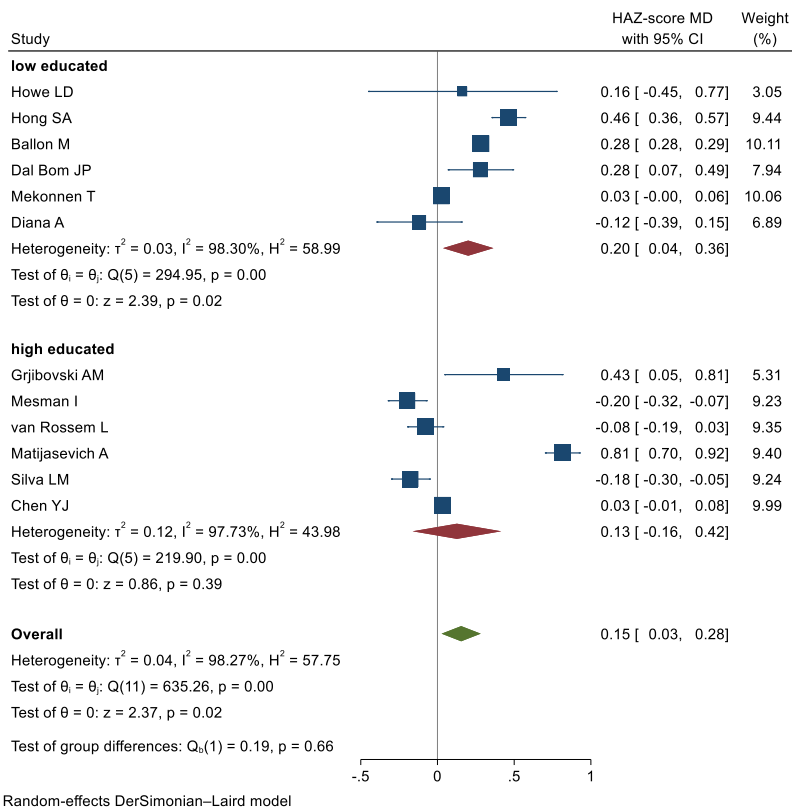

C

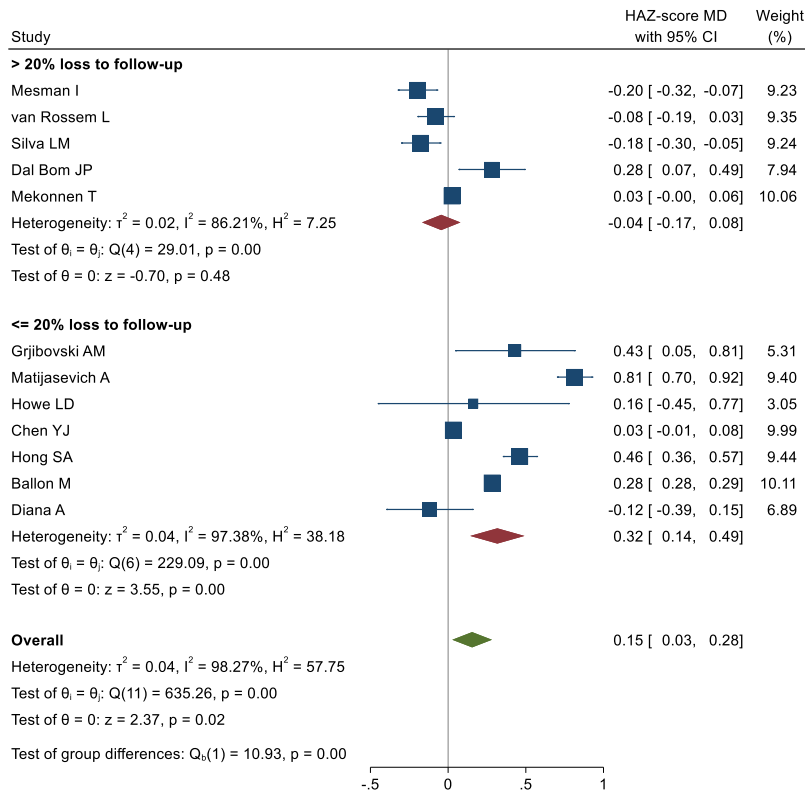

Random-effects DerSimonian-Laird model

D

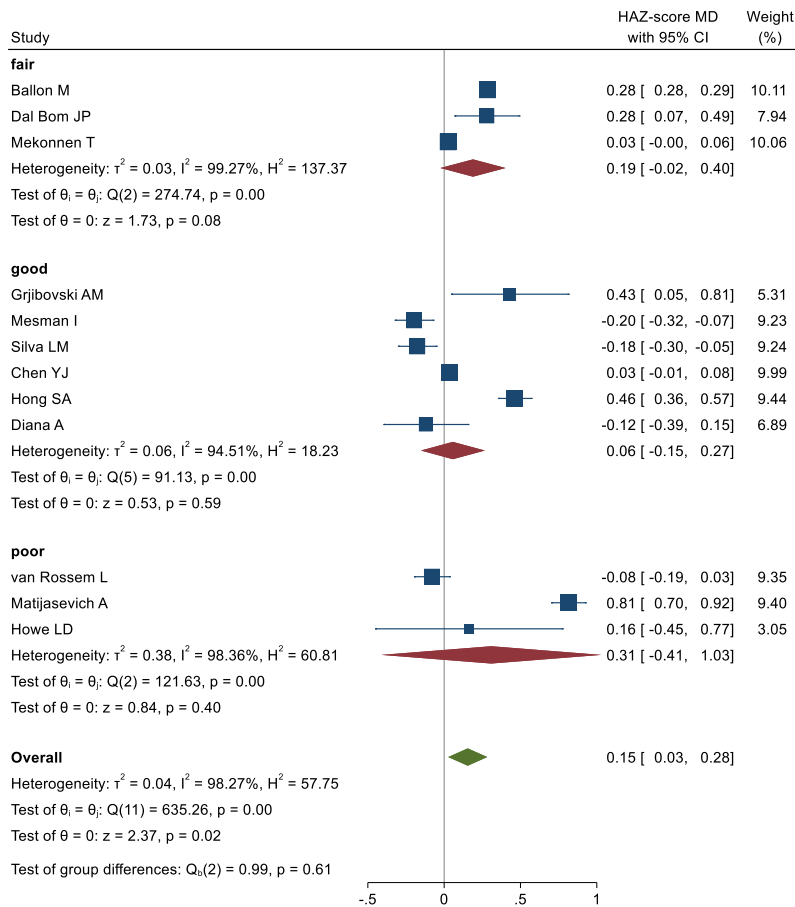

Random-effects DerSimonian-Laird model

# ➤ BMI Z-score

## A

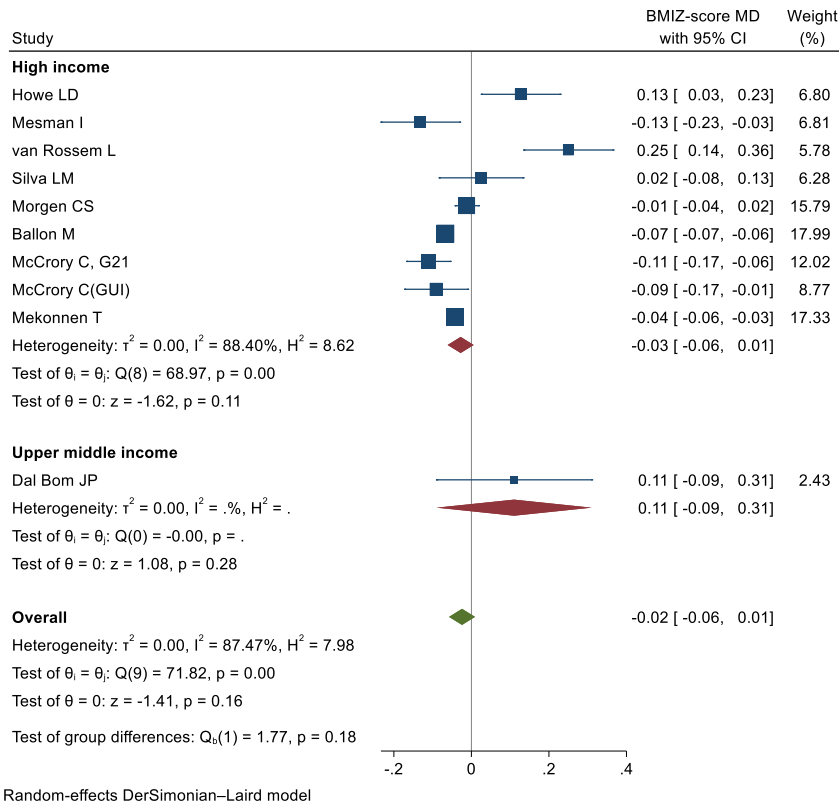

## B

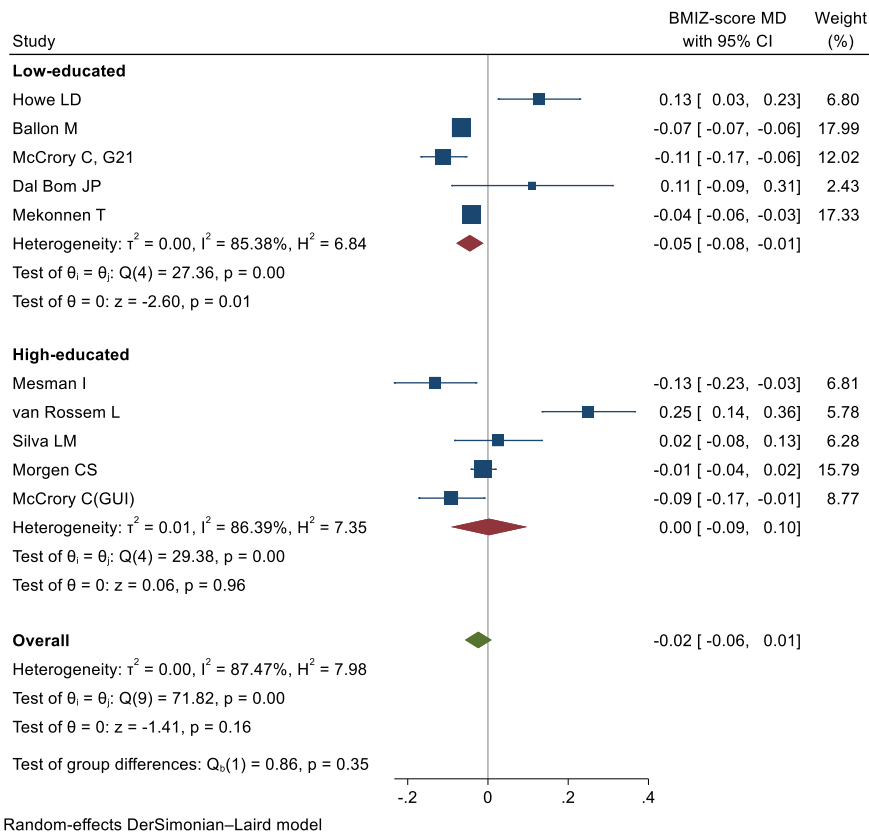

C

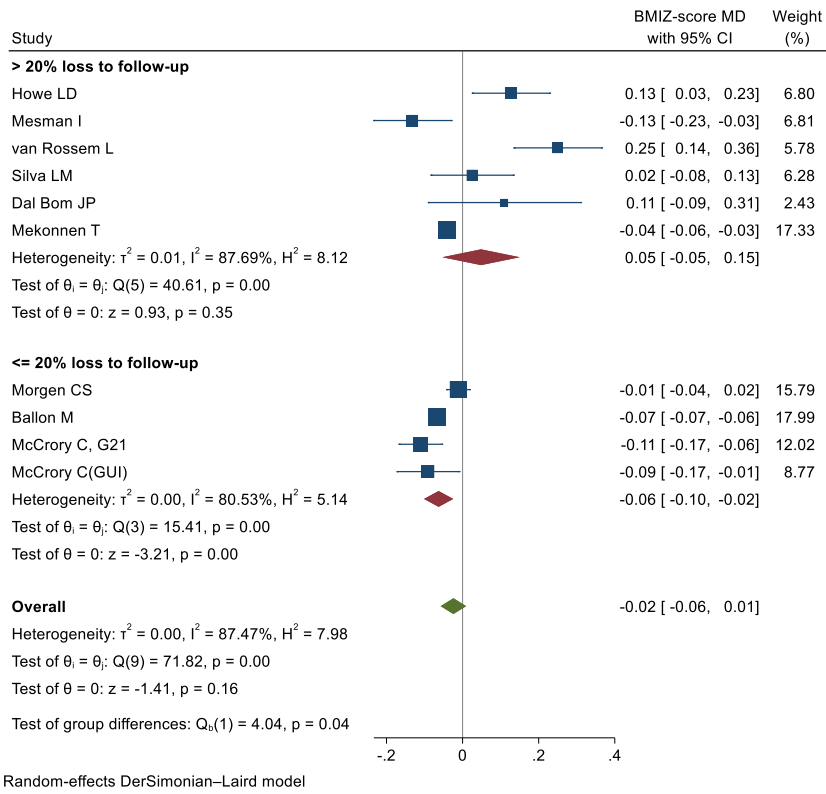

D

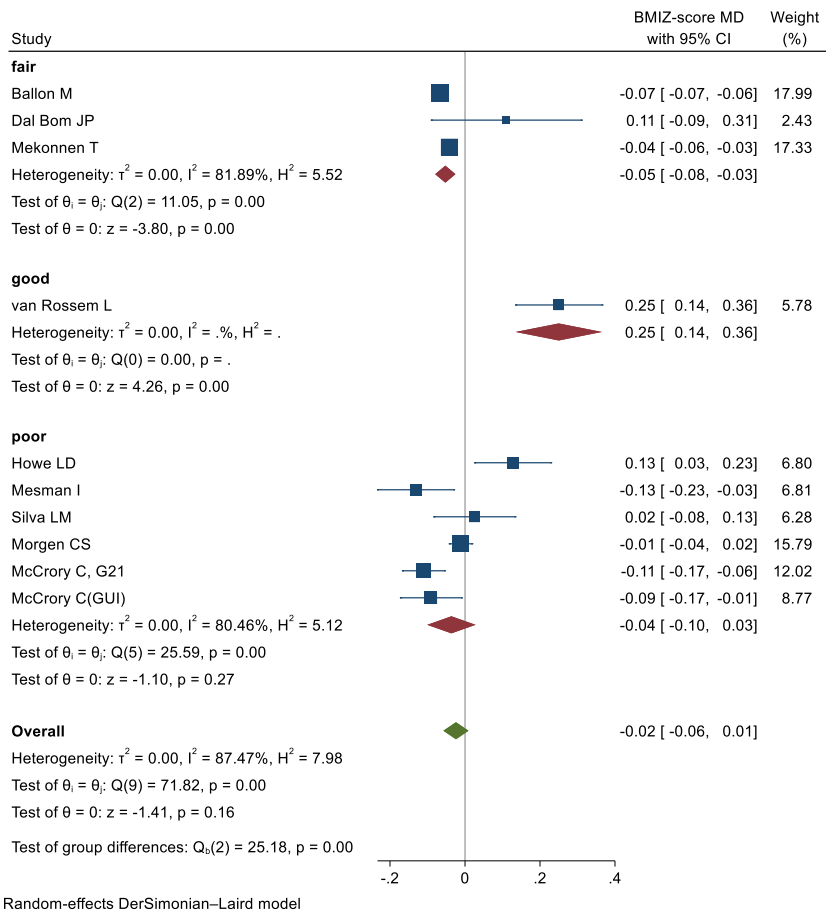

# ➤ Overweight

## A

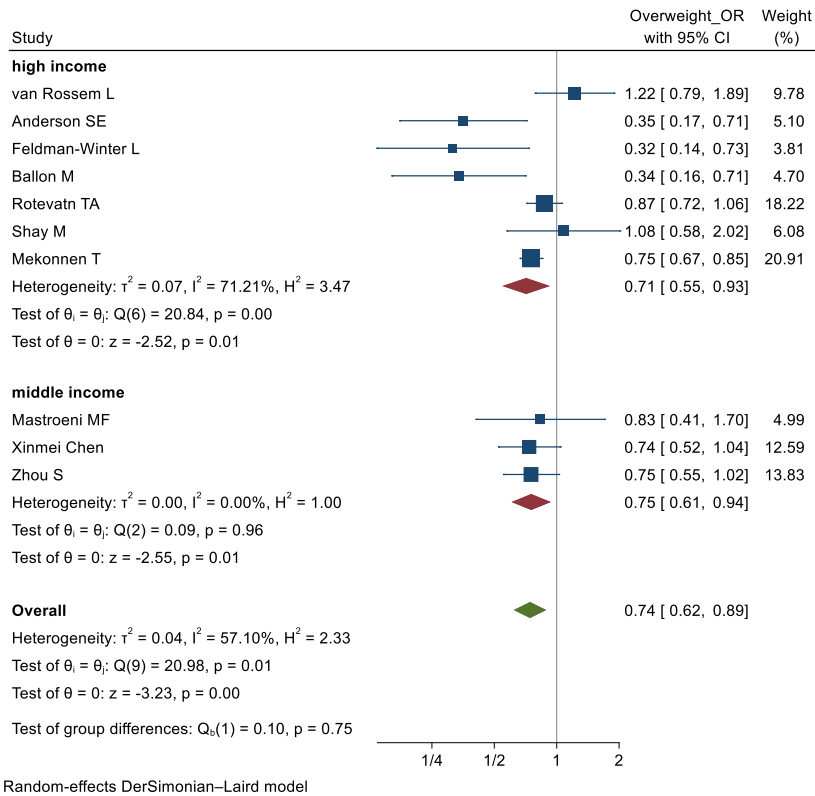

## B

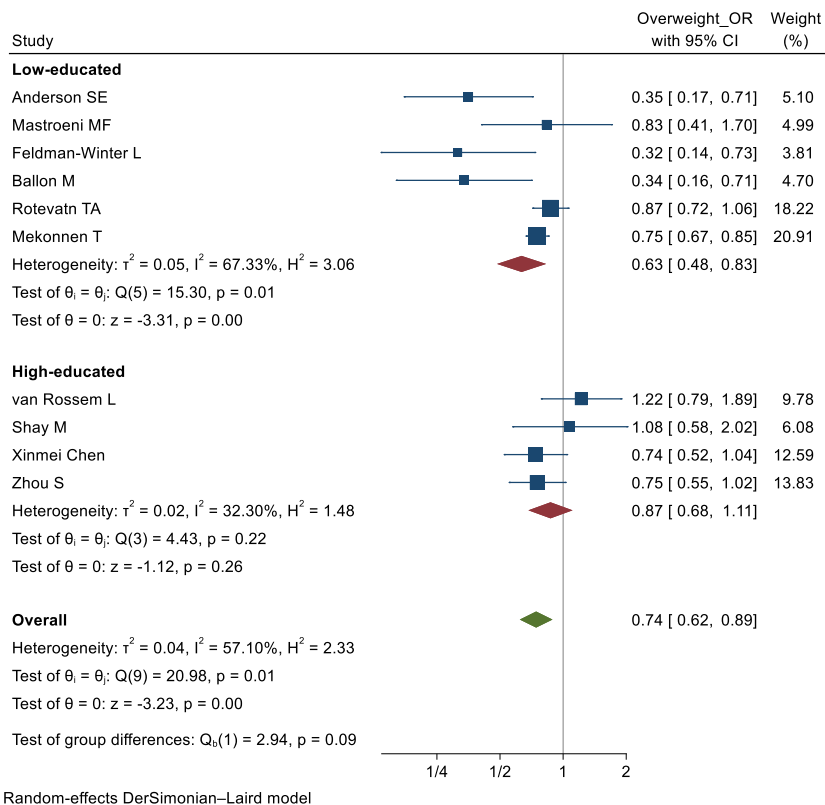

**C**

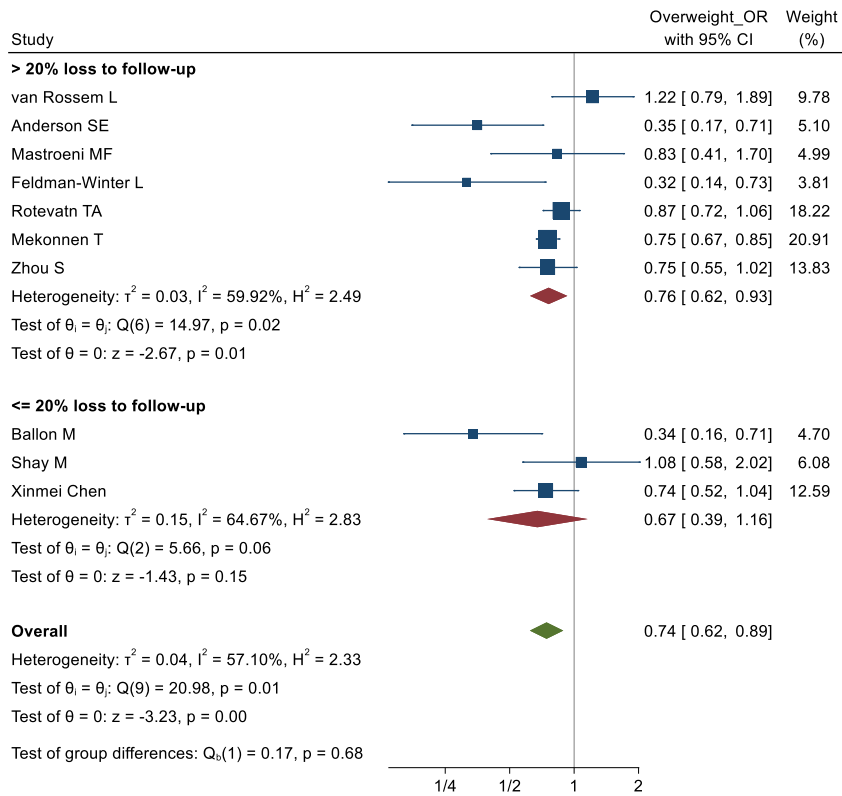

Random-effects DerSimonian-Laird model

**D**

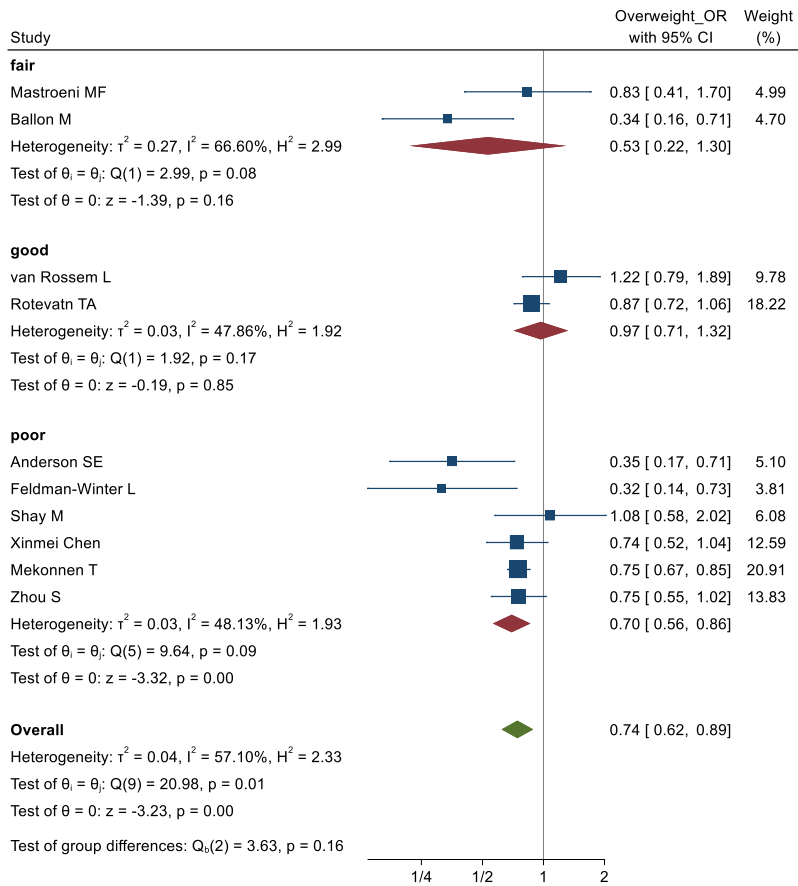

Random-effects DerSimonian-Laird model



# ➤ Stunting

## A

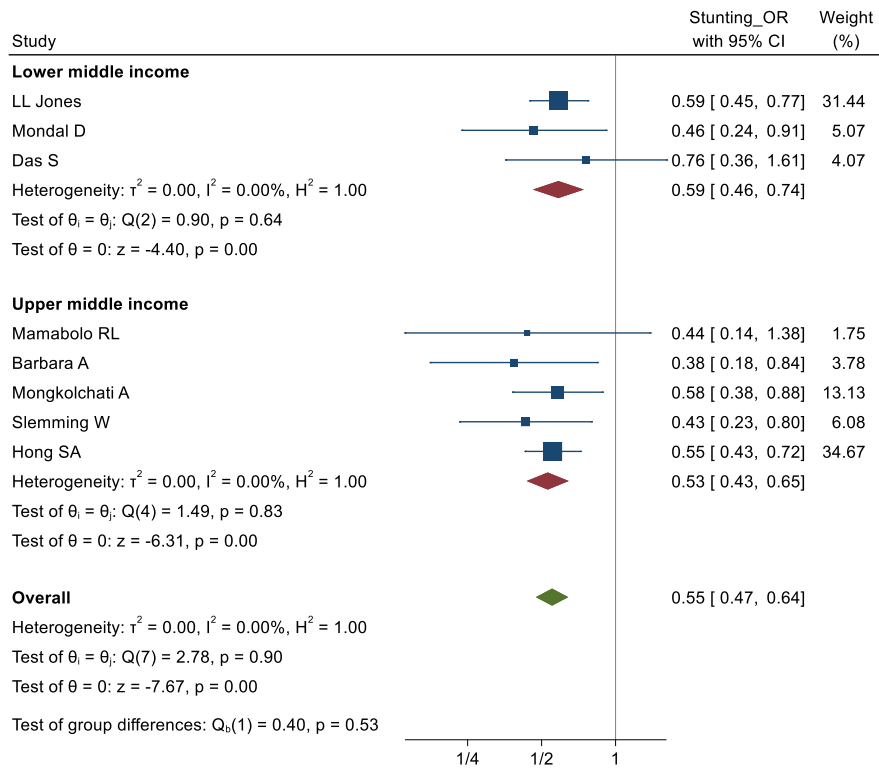

Random-effects DerSimonian–Laird model

## B

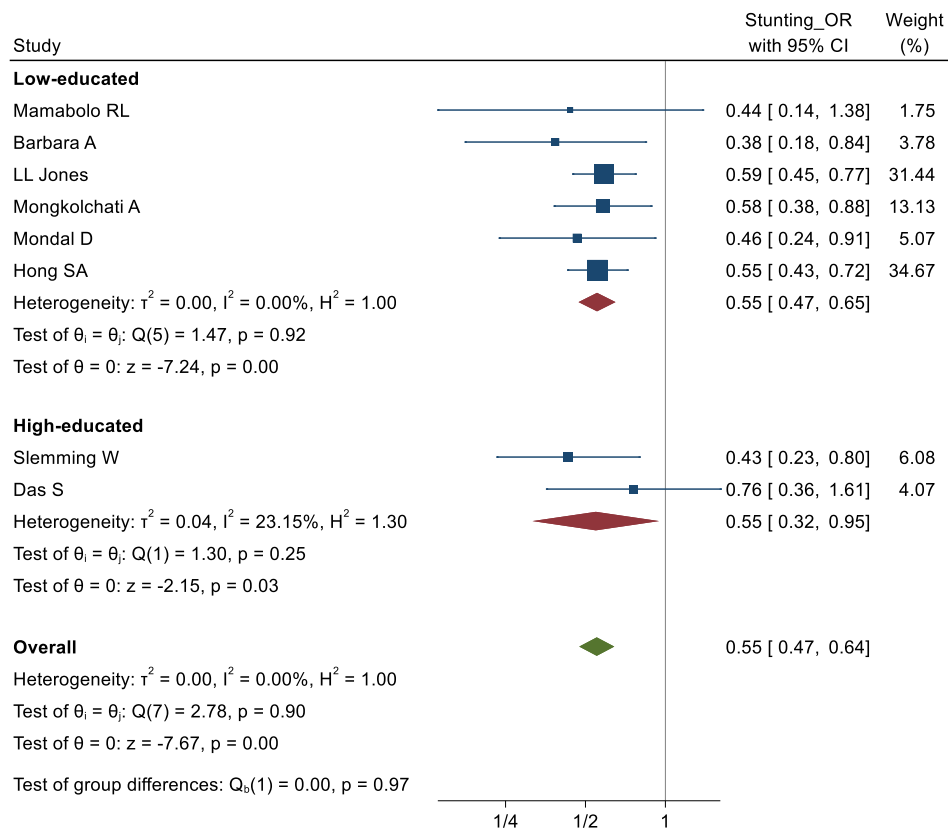

Random-effects DerSimonian–Laird model

**C**

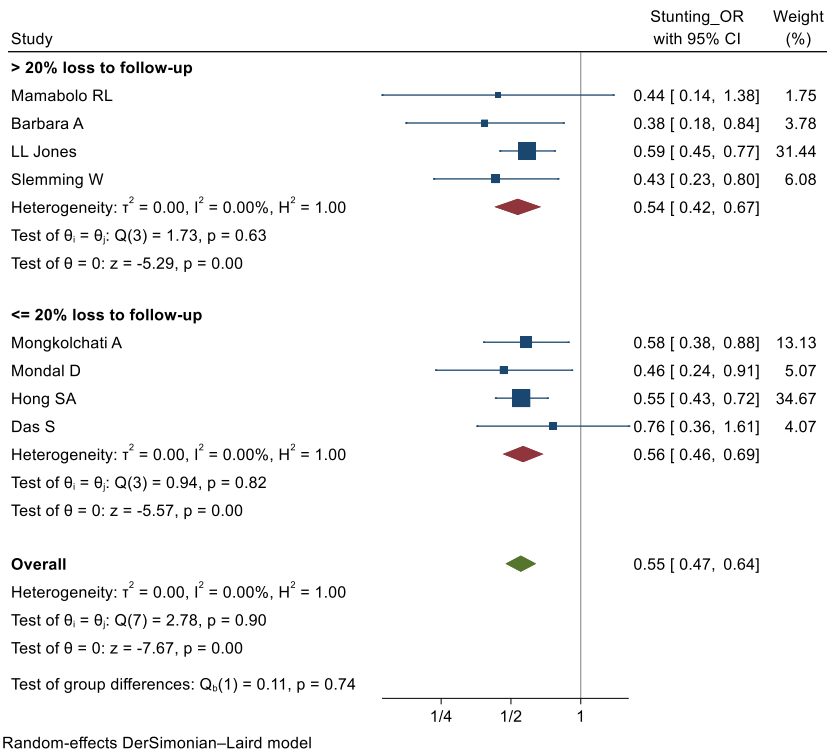

**D**

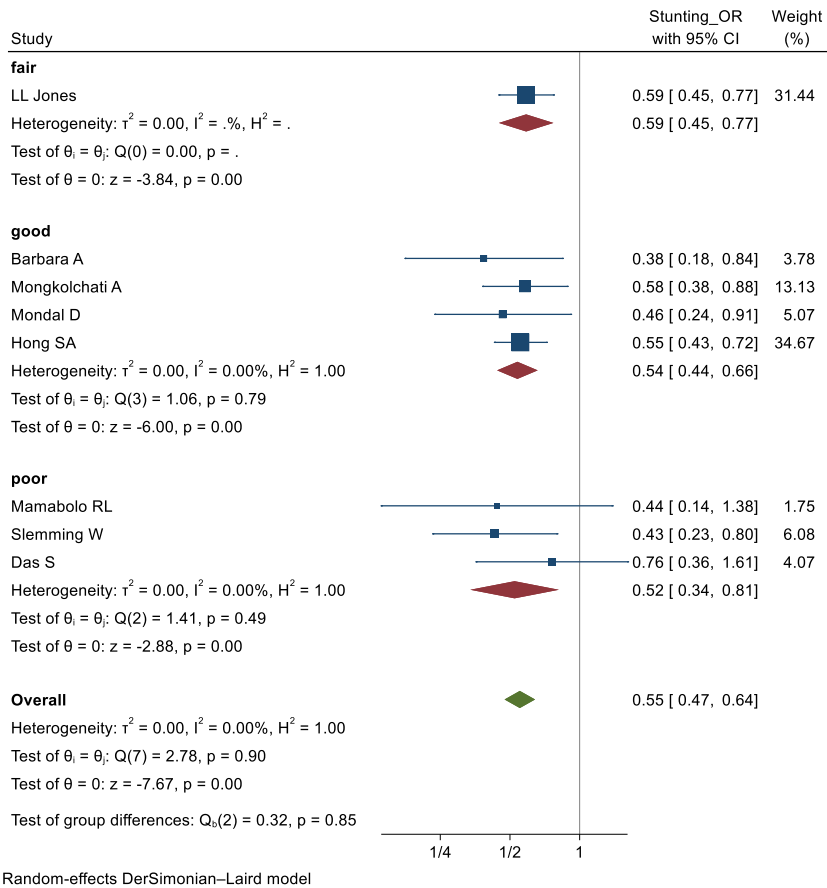

Supplement: mmc6.pdf [file mmc6.pdf]
