# Supplementary material for: Maternal education and its influence on child growth and nutritional status during the first two years of life: a systematic review and meta-analysis
Source: PubMed Central journal article supplement (PMC11001623; doi:10.1016/j.eclinm.2024.102574), 2024-04-04
Supplement: mmc4.pdf [file mmc4.pdf]

## Supplementary 4

### ➤ Excluded studies.

| No. | Year | Title                                                                                                                                                           | Journal                                               | Author                                                               | Cohort | Healthy Children Under 2 Years Old | "Child Growth" as an outcome | "Maternal Education Status" as an exposure | First reviewer decision* |   |   | Second reviewer decision |   |   | Exclusion Reason  |
|-----|------|-----------------------------------------------------------------------------------------------------------------------------------------------------------------|-------------------------------------------------------|----------------------------------------------------------------------|--------|------------------------------------|------------------------------|--------------------------------------------|--------------------------|---|---|--------------------------|---|---|-------------------|
|     |      |                                                                                                                                                                 |                                                       |                                                                      |        |                                    |                              |                                            | I                        | B | E | I                        | B | E |                   |
| 1   | 1991 | NICHD Study of Early Child Care. Volume II: 5 Month Manual, 6 Month Manuals, Time Use Manuals.                                                                  | -                                                     | National Inst. of Child Health and Human Development (NIH), Bethesda | -      | +                                  | *                            | *                                          |                          |   | 1 |                          |   | 1 | Ineligible        |
| 2   | 1991 | Maternal Work and Child-Care Strategies in Peri-Urban Guatemala: Nutritional Effects.                                                                           | Child Development                                     | Engle & Patrice L                                                    | -      | +                                  | +                            | +                                          |                          |   | 1 |                          |   | 1 | Ineligible        |
| 3   | 1991 | Long-term prospective evaluation of offspring of diabetic mothers.                                                                                              | Diabetes                                              | Silverman, BL.                                                       | +      | +                                  | +                            | -                                          |                          |   | 1 |                          |   | 1 | Ineligible        |
| 4   | 1991 | Underlying and proximate determinants of child health: the Cebu Longitudinal Health and Nutrition Study.                                                        | American journal of epidemiology                      |                                                                      | +      | +                                  | +                            | -                                          |                          |   | 1 |                          |   | 1 | Ineligible        |
| 5   | 1991 | Weight gain variation in infants of an impoverished community: Bellanse, Haiti.                                                                                 | International journal of epidemiology                 | Van Oyen, HJ.                                                        | +      | +                                  | +                            | +                                          | 1                        |   |   |                          |   | 1 | Weight gain       |
| 6   | 1991 | A prospective study of morbidity pattern and nutritional status of a group of healthy newborns during their first year of life in a rural area near Alexandria. | The Journal of the Egyptian Public Health Association | Ahmed, HM.                                                           | +      | +                                  | +                            | -                                          |                          |   | 1 |                          |   | 1 | Ineligible        |
| 7   | 1991 | Socio-cultural factors influencing nutritional status of infants -- a longitudinal study.                                                                       | Indian J Matern Child Health.                         | Hasan J.                                                             | +      | +                                  | +                            | +                                          |                          |   | 1 |                          |   | 1 | No full text      |
| 8   | 1992 | Maternal education in relation to early and late child health outcomes: findings from a Brazilian cohort study.                                                 | Social science & medicine (1982)                      | Victoria, CG.                                                        | +      | +                                  | +                            | +                                          |                          | 1 |   |                          |   | 1 | Insufficient data |
| 9   | 1992 | The National Institute of Child Health and Human Development (NICHD) Study of Early Child Care: A Comprehensive Longitudinal Study of Young Children's Lives.   | -                                                     | National Inst. of Child Health and Human Development (NIH)           | -      | +                                  | -                            | -                                          |                          |   | 1 |                          |   | 1 | Ineligible        |
| 10  | 1992 | NICHD Study of Early Child Care. Volume IV: 23 Month Manual, 24 Month Manuals.                                                                                  | -                                                     | National Inst. of Child Health and Human Development (NIH), Bethesda | -      | +                                  | -                            | -                                          |                          |   | 1 |                          |   | 1 | Ineligible        |

|    |      |                                                                                                                                                    |                                              |                                                    |   |   |   |   |  |  |   |  |  |   |              |
|----|------|----------------------------------------------------------------------------------------------------------------------------------------------------|----------------------------------------------|----------------------------------------------------|---|---|---|---|--|--|---|--|--|---|--------------|
| 11 | 1992 | Iron deficiency anemia in 1-year-old children of disadvantaged families in Montreal.                                                               | Canadian Medical Association journal         | Lehmann, F.                                        | + | + | - | + |  |  | 1 |  |  | 1 | Ineligible   |
| 12 | 1992 | Maternal recall of infant feeding events is accurate.                                                                                              | Journal of epidemiology and community health | Launer, J.I.                                       | + | + | + | - |  |  | 1 |  |  | 1 | Ineligible   |
| 13 | 1992 | Growth and behavior development in rural infants in relation to malnutrition and environment.                                                      | Indian pediatrics                            | Upadhyay, SK.                                      | + | + | + | - |  |  | 1 |  |  | 1 | Ineligible   |
| 14 | 1992 | Growth, behavior, development and intelligence in rural children between 1-3 years of life.                                                        | Indian pediatrics                            | Agarwal, DK.                                       | + | + | + | - |  |  | 1 |  |  | 1 | Ineligible   |
| 15 | 1992 | Birth spacing and child health in urban Brazilian children.                                                                                        | Pediatrics                                   | Huttly, S R;Victoria, C G;Barros, F C;Vaughan, J P | + | + | + | - |  |  | 1 |  |  | 1 | Ineligible   |
| 16 | 1992 | Observations on the development of stunting in children of the Khon Kaen region of Thailand.                                                       | European journal of clinical nutrition       | Chusilp, K.                                        | + | + | + | + |  |  | 1 |  |  | 1 | No full text |
| 17 | 1992 | SMOCC: Design of a representative cohort-study of live-born infants in the Netherlands                                                             | European Journal of Public Health            | Herngreen, WP.                                     | + | + | - | - |  |  | 1 |  |  | 1 | Ineligible   |
| 18 | 1992 | Mothers' reports of their three-year-old children's control over foods and involvement in food-related activities                                  | Journal of Nutrition Education               | Anliker, J A;Laus, M J;Samonds, K W;Beal, V A      | + | + | - | * |  |  | 1 |  |  | 1 | Ineligible   |
| 19 | 1992 | EUROMAC. A European concerted action: Maternal alcohol consumption and its relation to the outcome of pregnancy and Child Development at 18 months | International Journal of Epidemiology        | Du Florey, VC.                                     | + | - | + | + |  |  | 1 |  |  | 1 | Ineligible   |
| 20 | 1992 | A child health production function estimated from longitudinal data                                                                                | Journal of Development Economics             | Team, Cebu Study                                   | + | + | - | + |  |  | 1 |  |  | 1 | Ineligible   |
| 21 | 1993 | Mortality-discriminating power of some nutritional, sociodemographic, and diarrheal disease indices.                                               | American journal of epidemiology             | Bairagi R.                                         | - | + | + | - |  |  | 1 |  |  | 1 | Ineligible   |
| 22 | 1993 | Securing Our Future. Proceedings of the Conference on Children--Our Future (Kuala Lumpur, Malaysia, November 19-21, 1991).                         | -                                            | Chiam Ed.                                          | - | + | + | + |  |  | 1 |  |  | 1 | Ineligible   |
| 23 | 1993 | Children's nutritional status in female-headed households in the Dominican Republic.                                                               | Social Science & Medicine                    | Johnson FC.                                        | - | + | + | - |  |  | 1 |  |  | 1 | Ineligible   |
| 24 | 1993 | Teenage pregnancy and child health in the urban Sahel.                                                                                             | Studies in family planning                   | LeGrand, TK.                                       | - | + | - | + |  |  | 1 |  |  | 1 | Ineligible   |
| 25 | 1994 | Growth and nutrition patterns of infants associated with a nutrition education and supplementation programme in Gaza, 1987-92.                     | Bulletin of the World Health Organization    | Tulchinsky TH.                                     | + | + | + | - |  |  | 1 |  |  | 1 | Ineligible   |
| 26 | 1994 | Effect of prenatal marijuana exposure on the cognitive development of offspring at age three.                                                      | Neurotoxicology and Teratology               | Day NL.                                            | + | + | - | - |  |  | 1 |  |  | 1 | Ineligible   |
| 27 | 1994 | Economic Deprivation and Early Childhood Development                                                                                               | Child Development                            | Greg J.                                            | - | + | - | + |  |  | 1 |  |  | 1 | Ineligible   |
| 28 | 1994 | A reexamination of the association between HOME scores and income                                                                                  | Nursing Research                             | Bradley RH.                                        | + | + | - | - |  |  | 1 |  |  | 1 | Ineligible   |
| 29 | 1994 | Determinants of stunting and recovery from stunting in northwest Uganda.                                                                           | International journal of epidemiology        | Vella, V.                                          | + | - | + | + |  |  | 1 |  |  | 1 | Ineligible   |
| 30 | 1994 | Growth and nutrition patterns of infants associated with a nutrition education and supplementation programme in Gaza, 1987-92                      | Bulletin of the World Health Organization    | Tulchinsky, TH.                                    | + | + | + | - |  |  | 1 |  |  | 1 | Ineligible   |

|    |      |                                                                                                                                                    |                                                                                       |                             |   |   |   |   |   |  |   |   |   |   |                   |
|----|------|----------------------------------------------------------------------------------------------------------------------------------------------------|---------------------------------------------------------------------------------------|-----------------------------|---|---|---|---|---|--|---|---|---|---|-------------------|
| 31 | 1995 | Biochemical assessment of nutritional status in pre- and post-natal Turkish women and outcome of pregnancy                                         | European Journal of Clinical Nutrition                                                | Ackurt, F.                  | + | + | + | - |   |  | 1 |   |   | 1 | Ineligible        |
| 32 | 1995 | Cocaine-exposed children: follow-up through 30 months.                                                                                             | Journal of Developmental & Behavioral Pediatrics                                      | Hurt H.                     | + | + | + | - |   |  | 1 |   |   | 1 | Ineligible        |
| 33 | 1995 | Weight growth in infants born to mothers who smoked during pregnancy.                                                                              | BMJ (Clinical research ed.)                                                           | Conter, V.                  | + | + | + | - |   |  | 1 |   |   | 1 | Ineligible        |
| 34 | 1995 | Undernutrition among Bedouin Arab children: a follow-up of the Bedouin Infant Feeding Study.                                                       | The American journal of clinical nutrition                                            | Forman, MR.                 | + | + | + | - |   |  | 1 | 1 |   |   | Ineligible        |
| 35 | 1996 | Determinants of growth in body length from birth to 6 years of age: A longitudinal study of Lublin children.                                       | American journal of human biology : the official journal of the Human Biology Council | Hauspie, RC.                | + | + | + | + | 1 |  |   |   | 1 |   | Insufficient data |
| 36 | 1996 | Evaluation of a breastfeeding-support programme with health promoters' participation                                                               | Food and Nutrition Bulletin                                                           | Alvarado MR.                | * | + | + | - |   |  | 1 |   |   | 1 | Ineligible        |
| 37 | 1997 | How Does Schooling of Mothers Improve Child Health? Evidence from Morocco. Living Standards Measurement Study Working Paper No. 128.               | -                                                                                     | Glewwe, P.                  | - | * | + | + |   |  | 1 |   |   | 1 | Ineligible        |
| 38 | 1997 | Maternal Education and Its Influences on Child Growth and Cognitive Development in Rural Guatemala.                                                | -                                                                                     | Khandke, V.                 | - | + | - | + |   |  | 1 |   |   | 1 | Ineligible        |
| 39 | 1997 | Mothers' Working Models of Caregiving in the Context of Infant Feeding: Change through the First Year.                                             | -                                                                                     | Pridham, K.                 | + | + | + | - |   |  | 1 |   |   | 1 | Ineligible        |
| 40 | 1997 | Longitudinal study of nutrient and food intakes of infants aged 2 to 24 months                                                                     | Journal of the American Dietetic Association                                          | Skinner, JD.                | + | + | - | - |   |  | 1 |   |   | 1 | Ineligible        |
| 41 | 1997 | Age at introduction of complementary food and physical growth from 2 to 9 months in rural Senegal.                                                 | European journal of clinical nutrition                                                | Simondon, KB & Simondon, F. | + | + | + | - |   |  | 1 |   |   | 1 | Ineligible        |
| 42 | 1997 | Outcome of very low birth weight infants at 12 to 18 months of age in Soweto, South Africa.                                                        | Pediatrics                                                                            | Cooper, PA. & Sandler, DL.  | + | - | + | - |   |  | 1 |   |   | 1 | Ineligible        |
| 43 | 1997 | Postnatal growth patterns of full-term low birth weight infants in Northeast Brazil are related to socioeconomic status.                           | The Journal of nutrition                                                              | Ashworth, A.                | + | + | + | - |   |  | 1 |   |   | 1 | Ineligible        |
| 44 | 1997 | Maternal anthropometry and infant feeding practices in Israel in relation to growth in infancy: the North African Infant Feeding Study.            | The American journal of clinical nutrition                                            | Fawzi, WW.                  | + | + | + | - |   |  | 1 |   |   | 1 | Ineligible        |
| 45 | 1997 | Does intelligence account for the link between maternal literacy and child survival?                                                               | Social science & medicine (1982)                                                      | Sandiford, P.               | + | - | + | + |   |  | 1 |   |   | 1 | Ineligible        |
| 46 | 1997 | Nutrition and growth during infancy: The Copenhagen cohort study                                                                                   | Acta Paediatr Suppl.                                                                  | Michaelsen, KF.             | + | + | + | - |   |  | 1 |   |   | 1 | Ineligible        |
| 47 | 1998 | Socioeconomic stress, health and child nutritional status in Zimbabwe at a time of economic structural adjustment: a three year longitudinal study | -                                                                                     | Bijlmakers, LA.             | - | - | + | + |   |  | 1 |   |   | 1 | Ineligible        |
| 48 | 1998 | Social class differences in health until the age of seven years among the Finnish 1987 birth cohort                                                | Social Science & Medicine                                                             | Gissler, M.                 | + | + | - | + |   |  | 1 |   |   | 1 | Ineligible        |
| 49 | 1998 | Urbanization and child growth in Nepal.                                                                                                            | American journal of human biology                                                     | Moffat, T.                  | - | - | + | * |   |  | 1 | 1 |   |   | Ineligible        |

|    |      |                                                                                                                                                                          |                                                 |                           |   |   |   |   |   |  |   |   |   |   |                      |
|----|------|--------------------------------------------------------------------------------------------------------------------------------------------------------------------------|-------------------------------------------------|---------------------------|---|---|---|---|---|--|---|---|---|---|----------------------|
| 50 | 1998 | A longitudinal study of prolonged breastfeeding in relation to child undernutrition.                                                                                     | International journal of epidemiology           | Fawzi, WW.                | + | + | + | - |   |  | 1 |   |   | 1 | Ineligible           |
| 51 | 1998 | Growth in height and weight of South African urban infants from birth to five years: The Birth to Ten Study.                                                             | American journal of human biology               | Cameron, N.               | + | + | + | - |   |  | 1 |   |   | 1 | Ineligible           |
| 52 | 1999 | The Role of Maternal Literacy in Child Health and Cognitive Development in Rural Guatemala.                                                                              | -                                               | Khandke, V.               | + | + | - | + |   |  | 1 |   |   | 1 | Ineligible           |
| 53 | 1999 | Influence of socioeconomic conditions on growth in infancy: the 1921 Aberdeen birth cohort.                                                                              | Archives of disease in childhood                | Baxter-Jones, AD.         | + | + | + | - |   |  | 1 |   |   | 1 | Ineligible           |
| 54 | 1999 | Growth of children according to maternal and child HIV, immunological and disease characteristics: a prospective cohort study in Kinshasa, Democratic Republic of Congo. | International journal of epidemiology           | Bailey, RC.               | + | + | + | - |   |  | 1 |   |   | 1 | Ineligible           |
| 55 | 1999 | Influence of the home environment on the development of obesity in children.                                                                                             | Pediatrics                                      | Strauss, RS. & Knight, J. | + | - | + | + |   |  | 1 |   |   | 1 | Ineligible           |
| 56 | 1999 | [Growth of breastfed and bottle-fed infants up to 2 years of age: CLACYD (Lactation, Alimentation, Growth and Development) study 1993-1995].                             | Rev Panam Salud Publica                         | Agrelo, F. J              | + | + | + | - |   |  | 1 |   |   | 1 | Ineligible           |
| 57 | 2000 | Premature complementary feeding is associated with poorer growth of vietnamese children.                                                                                 | The Journal of nutrition                        | Hop, LT.                  | + | + | + | - |   |  | 1 |   |   | 1 | Ineligible           |
| 58 | 2000 | Parental risk factors for infant obesity.                                                                                                                                | The American journal of maternal child nursing  | Sowan, NA. & Stember, ML. | + | + | + | - |   |  | 1 |   |   | 1 | Ineligible           |
| 59 | 2000 | Modeling the effects of maternal nutritional status and socioeconomic variables on the anthropometric and psychological indicators of Kenyan infants from age 0-6 months | Am J Phys Anthropol                             | Bhargava, A.              | + | + | + | - |   |  | 1 |   |   | 1 | Ineligible           |
| 60 | 2000 | Risk factors for stunting and wasting at age six, twelve and twenty-four months for squatter children of Karachi, Pakistan.                                              | The Journal of the Pakistan Medical Association | Fikree, FF.               | + | + | + | + | 1 |  |   | 1 |   |   | Insufficient data    |
| 61 | 2000 | Sociodemographic characteristics, care, feeding practices, and growth of cohorts of children born to HIV-1 seropositive and seronegative mothers in Nairobi, Kenya.      | Tropical medicine & international health        | Sherry, B.                | + | + | + | - |   |  | 1 |   |   | 1 | Ineligible           |
| 62 | 2000 | Predictors of growth from 1 to 18 months among breast-fed Ghanaian infants                                                                                               | European Journal of Clinical Nutrition          | Lartey, A.                | + | + | + | + | 1 |  |   | 1 |   |   | Continuous Education |
| 63 | 2001 | Longevity determined by paternal ancestors' nutrition during their slow growth period.                                                                                   | Acta biotheoretica                              | Bygren, LO.               | + | - | + | - |   |  | 1 |   |   | 1 | Ineligible           |
| 64 | 2001 | Full breast-feeding for at least four months has differential effects on growth before and after six months of age among children in a Mexican community.                | The Journal of nutrition                        | Eckhardt, CL.             | + | + | + | - |   |  | 1 | 1 |   |   | Ineligible           |
| 65 | 2001 | Ethnicity and infant health in Southern Brazil. A birth cohort study.                                                                                                    | International journal of epidemiology           | Barros, FC.               | + | + | + | - |   |  | 1 |   |   | 1 | Ineligible           |
| 66 | 2001 | Breast-feeding is associated with improved growth in length, but not weight, in rural Senegalese toddlers.                                                               | The American journal of clinical nutrition      | Simondon, KB.             | + | + | + | - |   |  | 1 |   |   | 1 | Ineligible           |
| 67 | 2001 | Breastfeeding and complementary feeding practices in rural Malawi.                                                                                                       | Acta paediatrica                                | Vaahtera, MP.             | + | + | * | - |   |  | 1 |   |   | 1 | Ineligible           |
| 68 | 2001 | Inequalities in the health of newborns in the Czech Republic: Birth cohort 1994-1998                                                                                     | Acta Universitatis Carolinae, Geographica       | Dzúrová, D.               | + | - | - | + |   |  | 1 |   | 1 |   | Ineligible           |

|    |      |                                                                                                                                               |                                            |                              |   |   |   |   |   |  |   |   |   |                      |
|----|------|-----------------------------------------------------------------------------------------------------------------------------------------------|--------------------------------------------|------------------------------|---|---|---|---|---|--|---|---|---|----------------------|
| 69 | 2002 | Livelihoods, nutrition and health in Dhaka slums                                                                                              | Public Health Nutrition                    | Pryer, JA.                   | - | - | + | + |   |  | 1 |   | 1 | Ineligible           |
| 70 | 2002 | The treatment of parental height as a biological factor in studies of birth weight and childhood growth                                       | Archives of disease in childhood           | Spencer, NJ. & Logan, S.     | + | - | + | - |   |  | 1 |   | 1 | Ineligible           |
| 71 | 2002 | Weight and weight gain at 4 months (The Netherlands 1998): influences of nutritional practices, socio-economic and ethnic factors.            | Paediatric and perinatal epidemiology      | Bulk-Bunschoten AM.          | - | + | + | + |   |  | 1 | 1 |   | Ineligible           |
| 72 | 2002 | Determinants of linear growth and predictors of severe stunting during infancy in rural Malawi.                                               | Acta paediatrica (Oslo, Norway : 1992)     | Espo, M.                     | + | + | + | - |   |  | 1 |   | 1 | Ineligible           |
| 73 | 2003 | Effects of low income on infant health                                                                                                        | Canadian Medical Association Journal       | Seguin, L.                   | + | - | - | + |   |  | 1 |   | 1 | Ineligible           |
| 74 | 2003 | Social inequalities in infant feeding during the first year of life. The Longitudinal Study of Child Development in Québec (LSCDQ 1998-2002). | Public health nutrition                    | Dubois, L. & Girard, M.      | + | + | - | + |   |  | 1 | 1 |   | Ineligible           |
| 75 | 2003 | Maternal employment and overweight children.                                                                                                  | Journal of health economics                | Anderson, PM.                | + | - | + | + |   |  | 1 |   | 1 | Ineligible           |
| 76 | 2003 | Longitudinal growth patterns of Pakistani infants in a clinic based growth promotion program.                                                 | Indian pediatrics                          | Qazi, Sh. A.                 | + | + | + | - |   |  | 1 |   | 1 | Ineligible           |
| 77 | 2003 | Growth of very low birth weight infants to age 20 years.                                                                                      | Pediatrics                                 | Hack, M.                     | + | + | + | - |   |  | 1 |   | 1 | Ineligible           |
| 78 | 2003 | Postnatal depression and infant growth and development in low income countries: a cohort study from Goa, India.                               | Archives of disease in childhood           | Patel, V.                    | + | + | + | - |   |  | 1 | 1 |   | Ineligible           |
| 79 | 2003 | Obesity from cradle to grave.                                                                                                                 | International journal of obesity           | Eriksson, J.                 | + | + | + | - |   |  | 1 |   | 1 | Ineligible           |
| 80 | 2003 | The Influence of Nutritional and Genetic Factors on Growth and BMI until 5 Years of Age                                                       | Monatsschrift fur Kinderheilkunde          | Haschke, F. & Van't Hof, MA. | + | + | + | + | 1 |  |   | 1 |   | Continuous Education |
| 81 | 2004 | Failure to Thrive in the Term and Preterm Infants of Mothers Depressed in the Postnatal Period: A Population-Based Birth Cohort Study         | Journal of Child Psychology and Psychiatry | Drewett, R.                  | + | + | + | - |   |  | 1 |   | 1 | Ineligible           |
| 82 | 2004 | The WHO Multicentre Growth Reference Study: planning, study design, and methodology.                                                          | Food and nutrition bulletin                | de Onis, M.                  | - | + | + | + |   |  | 1 |   | 1 | Ineligible           |
| 83 | 2004 | Human immunodeficiency virus infection, diarrheal disease and sociodemographic predictors of child growth.                                    | Acta paediatrica (Oslo, Norway: 1992)      | Villamor, E.                 | - | + | + | + |   |  | 1 | 1 |   | Ineligible           |
| 84 | 2004 | Predictors of children's body mass index: a longitudinal study of diet and growth in children aged 2-8 y.                                     | International journal of obesity           | Skinner, J.                  | + | + | + | - |   |  | 1 |   | 1 | Ineligible           |
| 85 | 2004 | Do early infant feeding patterns relate to breast-feeding continuation and weight gain? Data from a longitudinal cohort study.                | European journal of clinical nutrition     | Casiday, RE.                 | + | + | - | + |   |  | 1 |   | 1 | Ineligible           |
| 86 | 2004 | Early environment and child-to-adult growth trajectories in the 1958 British birth cohort.                                                    | The American journal of clinical nutrition | Li, L.                       | + | + | + | - |   |  | 1 |   | 1 | Ineligible           |
| 87 | 2004 | Predicting preschooler obesity at birth: the role of maternal obesity in early pregnancy.                                                     | Pediatrics                                 | Whitaker, RC.                | + | - | + | + |   |  | 1 |   | 1 | Ineligible           |
| 88 | 2004 | Predictors of body size in the first 2 y of life: a high-risk study of human obesity.                                                         | International journal of obesity           | Stunkard, AJ.                | + | + | + | - |   |  | 1 |   | 1 | Ineligible           |
| 89 | 2004 | Family, socioeconomic and prenatal factors associated with failure to thrive in the Avon Longitudinal Study of Parents and Children (ALSPAC). | International journal of epidemiology      | Blair, PS.                   | + | + | + | - |   |  | 1 | 1 |   | Ineligible           |

|     |      |                                                                                                                                                                                                                        |                                                    |                                              |   |   |   |   |  |   |   |   |  |            |                      |
|-----|------|------------------------------------------------------------------------------------------------------------------------------------------------------------------------------------------------------------------------|----------------------------------------------------|----------------------------------------------|---|---|---|---|--|---|---|---|--|------------|----------------------|
| 90  | 2004 | Impact of maternal depression on infant nutritional status and illness: a cohort study.                                                                                                                                | Archives of general psychiatry                     | Rahman, A.                                   | + | + | + | + |  | 1 | 1 |   |  | Ineligible |                      |
| 91  | 2004 | Macro shocks and micro outcomes: Child nutrition during Indonesia's crisis                                                                                                                                             | Economics and Human Biology                        | Block, SA.                                   | - | * | + | * |  |   | 1 |   |  | 1          | Ineligible           |
| 92  | 2005 | Understanding the dimensions of socioeconomic status that influence toddlers' health: unique impact of lack of money for basic needs in Quebec's birth cohort                                                          | Journal of Epidemiology and Community Health       | Seguin, L.                                   | + | + | - | + |  |   | 1 |   |  | 1          | Ineligible           |
| 93  | 2005 | A young child feeding index is not associated with either height-for-age or height velocity in rural Senegalese children                                                                                               | Journal of Nutrition                               | Ntab, B.                                     | - | + | + | * |  |   | 1 |   |  | 1          | Ineligible           |
| 94  | 2005 | Dynamics of early childhood overweight                                                                                                                                                                                 | pediatrics                                         | Salsberry, P.J. & Reagan, PB.                | - | - | + | + |  |   | 1 |   |  | 1          | Ineligible           |
| 95  | 2005 | Truncal adiposity is present at birth and in early childhood in South Indian children.                                                                                                                                 | Indian pediatrics                                  | Krishnaveni, GV.                             | + | + | + | - |  |   | 1 |   |  | 1          | Ineligible           |
| 96  | 2005 | The effect of breastfeeding on weight gain in infants: results of a birth cohort study.                                                                                                                                | European journal of medical research               | Kalies, H.                                   | + | + | + | - |  |   | 1 |   |  | 1          | Ineligible           |
| 97  | 2005 | Prevalence and determinants of stunting and overweight in 3-year-old black South African children residing in the Central Region of Limpopo Province, South Africa.                                                    | Public health nutrition                            | Mamabolo, RL.                                | + | - | + | + |  |   | 1 |   |  | 1          | Ineligible           |
| 98  | 2005 | Growth trajectories are influenced by breast-feeding and infant health in an afro-colombian community.                                                                                                                 | The Journal of nutrition                           | Alvarado, BE.                                | * | + | + | * |  | 1 |   | 1 |  |            | Continuous Education |
| 99  | 2005 | The importance of slow weight gain in the first 2 months in identifying children who fail to thrive                                                                                                                    | Journal of Reproductive and Infant Psychology      | Drewett, R.                                  | + | + | + | - |  |   | 1 |   |  | 1          | Ineligible           |
| 100 | 2006 | Growth in the neonatal intensive care unit influences neurodevelopmental and growth outcomes of extremely low birth weight infants.                                                                                    | Pediatrics                                         | Ehrenkranz, RA.                              | + | + | + | - |  |   | 1 |   |  | 1          | Ineligible           |
| 101 | 2006 | Enrolment and baseline characteristics in the WHO Multicentre Growth Reference Study.                                                                                                                                  | Acta paediatrica (Oslo, Norway : 1992). Supplement | WHO Multicentre Growth Reference Study Group | * | * | + | - |  |   | 1 |   |  | 1          | Ineligible           |
| 102 | 2006 | The influence of maternal socioeconomic and emotional factors on infant weight gain and weight faltering (failure to thrive): data from a prospective birth cohort.                                                    | Archives of disease in childhood                   | Wright, C M.                                 | + | + | + | + |  | 1 |   | 1 |  |            | Ineligible           |
| 103 | 2006 | [Growth of full term low and adequate birth weight infants during the first two years of life].                                                                                                                        | Revista de saude publica                           | Eickmann, S H.                               | + | + | + | - |  |   | 1 |   |  | 1          | Ineligible           |
| 104 | 2006 | A fresh look at growth assessment of infants and young children in the Czech Republic in context of international developments.                                                                                        | Central European journal of public health          | Vignerová, J. & Lhotská, L.                  | * | * | + | - |  |   | 1 |   |  | 1          | Ineligible           |
| 105 | 2006 | Breastfeeding influences on growth and health at one year of age.                                                                                                                                                      | Breastfeeding review                               | Oddy, Wendy H.                               | + | + | + | - |  |   | 1 |   |  | 1          | Ineligible           |
| 106 | 2006 | Assessment of 24 years of infant growth monitoring in a rural area of Senegal (1969-1992)                                                                                                                              | Cahiers Sante                                      | Enel, C.                                     | * | + | + | - |  |   | 1 |   |  | 1          | Ineligible           |
| 107 | 2007 | Duration of poverty and child health in the Quebec Longitudinal Study of Child Development: longitudinal analysis of a birth cohort.                                                                                   | Pediatrics                                         | Seguin, L.                                   | + | + | + | - |  |   | 1 |   |  | 1          | Ineligible           |
| 108 | 2007 | Socio-economic, environmental, care, health and nutritional determinants in the aetiology of severe protein-energy malnutrition in Southern Ethiopia (Sidama) with emphasis on kwashiorkor: a one year prospective and | -                                                  | Dreschl-Bogale, S.                           | + | * | + | - |  |   | 1 |   |  | 1          | Ineligible           |

|     |      |                                                                                                                                                                                    |                                                                                 |                            |   |   |   |   |  |  |  |   |   |   |  |   |  |            |
|-----|------|------------------------------------------------------------------------------------------------------------------------------------------------------------------------------------|---------------------------------------------------------------------------------|----------------------------|---|---|---|---|--|--|--|---|---|---|--|---|--|------------|
|     |      | retrospective follow-up study to find out predisposing factors                                                                                                                     |                                                                                 |                            |   |   |   |   |  |  |  |   |   |   |  |   |  |            |
| 109 | 2007 | Immigrant generation, socioeconomic status, and economic development of countries of origin: a longitudinal study of body mass index among children                                | Social science & medicine                                                       | Van Hook, J.               | + | * | + | - |  |  |  | 1 |   |   |  | 1 |  | Ineligible |
| 110 | 2007 | Polymorphisms in the angiotensin converting enzyme gene and growth in the first year of life.                                                                                      | Annals of human genetics                                                        | Hindmarsh, PC.             | + | + | + | - |  |  |  | 1 |   |   |  | 1 |  | Ineligible |
| 111 | 2007 | Birth size and accelerated growth during infancy are associated with increased odds of childhood overweight in Mexican children.                                                   | Journal of the American Dietetic Association                                    | Jones-Smith, JC.           | + | + | + | - |  |  |  | 1 |   |   |  | 1 |  | Ineligible |
| 112 | 2007 | Ethnobotanical knowledge is associated with indices of child health in the Bolivian Amazon.                                                                                        | Proceedings of the National Academy of Sciences of the United States of America | McDade, T W.               | + | * | + | - |  |  |  | 1 |   |   |  | 1 |  | Ineligible |
| 113 | 2007 | Size at birth and growth trajectories to young adulthood.                                                                                                                          | American journal of human biology                                               | Adair, LS                  | + | + | * | - |  |  |  | 1 |   | 1 |  |   |  | Ineligible |
| 114 | 2007 | Complementary feeding practices in preterm infants: an observational study in a cohort of Italian infants.                                                                         | Journal of pediatric gastroenterology and nutrition                             | Fanaro, S.                 | + | + | - | + |  |  |  | 1 |   |   |  | 1 |  | Ineligible |
| 115 | 2008 | Schooling C, Cowling B, Leung S, Lam T, et al (2008) Are universal standards for optimal infant growth appropriate? Evidence from a Hong Kong Chinese birth cohort                 | Arch Dis Child                                                                  | Hui, L.                    | + | + | + | - |  |  |  | 1 | 1 |   |  |   |  | Ineligible |
| 116 | 2008 | Correlation of 4-month infant feeding modes with their growth and iron status in Beijing                                                                                           | Chinese Medical Journal                                                         | Yu-Hua, G.                 | + | + | + | - |  |  |  | 1 |   |   |  | 1 |  | Ineligible |
| 117 | 2008 | Maternal-child health in Pelotas, Rio Grande do Sul State, Brazil: major conclusions from comparisons of the 1982, 1993, and 2004 birth cohorts.                                   | Cadernos de saude publica                                                       | Barros, FC. & Victora, CG. | + | * | - | - |  |  |  | 1 |   |   |  | 1 |  | Ineligible |
| 118 | 2008 | Maternal labour supply and childhood obesity in Canada: Evidence from the NLSCY                                                                                                    | Canadian Journal of Economics                                                   | Chia, YF.                  | - | * | + | * |  |  |  | 1 |   |   |  | 1 |  | Ineligible |
| 119 | 2008 | Infant malnutrition and obesity in three population-based birth cohort studies in Southern Brazil: Trends and differences                                                          | Cadernos de Saude Publica                                                       | Barros, AJD.               | + | + | + | - |  |  |  | 1 |   |   |  | 1 |  | Ineligible |
| 120 | 2008 | Does son preference influence children's growth in height? A comparative study of Chinese and Filipino children                                                                    | Population Studies                                                              | Song, S.                   | - | * | + | * |  |  |  | 1 |   |   |  | 1 |  | Ineligible |
| 121 | 2008 | Birth weight, infant growth, and childhood body mass index: Hong Kong's children of 1997 birth cohort                                                                              | Archives of Pediatrics and Adolescent Medicine                                  | Hui, LL.                   | + | * | + | - |  |  |  | 1 |   |   |  | 1 |  | Ineligible |
| 122 | 2009 | Time-independent Maternal and Infant Factors and Time-dependent Infant Morbidities including HIV Infection, Contribute to Infant Growth Faltering during the First 2 Years of Life | Journal of Tropical Pediatrics                                                  | Webb, AL.                  | - | + | + | + |  |  |  | 1 |   |   |  | 1 |  | Ineligible |
| 123 | 2009 | Offspring consume a more obesogenic diet than mothers in response to changing socioeconomic status and urbanization in Cebu, Philippines.                                          | The international journal of behavioral nutrition and physical activity         | Kelles, A.                 | * | - | * | + |  |  |  | 1 | 1 |   |  |   |  | Ineligible |
| 124 | 2009 | Impact of infant feeding practices on childhood obesity.                                                                                                                           | The Journal of nutrition                                                        | Butte, NF.                 | * | - | + | + |  |  |  | 1 |   |   |  | 1 |  | Ineligible |
| 125 | 2009 | Food prices, access to food outlets and child weight.                                                                                                                              | Economics and human biology                                                     | Powell, LM.                | * | - | + | + |  |  |  | 1 |   |   |  | 1 |  | Ineligible |

|     |      |                                                                                                                                                                             |                                             |                               |   |   |   |   |  |  |   |   |   |                   |
|-----|------|-----------------------------------------------------------------------------------------------------------------------------------------------------------------------------|---------------------------------------------|-------------------------------|---|---|---|---|--|--|---|---|---|-------------------|
| 126 | 2009 | [WHO growth standards for infants and young children].                                                                                                                      | Archives de pediatrie                       | de Onis, M.                   | * | + | + | - |  |  | 1 |   | 1 | Ineligible        |
| 127 | 2009 | Child health and the income gradient: evidence from Australia.                                                                                                              | Journal of health economics                 | Khanam, R.                    | + | + | * | - |  |  | 1 |   | 1 | Ineligible        |
| 128 | 2009 | Effect of birth weight and postnatal weight gain on body composition in early infancy: The Generation R Study.                                                              | Early human development                     | Holzhauser S.                 | + | + | + | - |  |  | 1 |   | 1 | Ineligible        |
| 129 | 2009 | Maternal Behavior and Infant Weight Gain in the First Year                                                                                                                  | Journal of Nutrition Education and Behavior | Worobey J.                    | + | + | + | - |  |  | 1 |   | 1 | Ineligible        |
| 130 | 2009 | Period-specific growth, overweight and modification by breastfeeding in the GINI and LISA birth cohorts up to age 6 years                                                   | European Journal of Epidemiology            | Rzehak, P.                    | + | + | + | - |  |  | 1 |   | 1 | Ineligible        |
| 131 | 2009 | Mothers' community participation and child health                                                                                                                           | Journal of Health and Social Behavior       | Nobles, J. & Frankenber g, E. | - | * | * | * |  |  | 1 |   | 1 | Ineligible        |
| 132 | 2009 | Height, wealth, and health: An overview with new data from three longitudinal studies                                                                                       | Economics and Human Biology                 | Batty, GD.                    | - | * | * | - |  |  | 1 |   | 1 | Ineligible        |
| 133 | 2009 | Delayed lactogenesis and excess neonatal weight loss are common across ethnic and socioeconomic categories of primiparous women in Northern California                      | The FASEB Journal                           | Dewey, KG.                    | + | + | + | + |  |  | 1 |   | 1 | Insufficient data |
| 134 | 2010 | The early growth and development study: using the prospective adoption design to examine genotype-environment interplay. 2008.                                              | Behavior Genetics                           | Leve, LD.                     | + | + | - | - |  |  | 1 |   | 1 | Ineligible        |
| 135 | 2010 | Low Income, Mexican Mothers' Perception of Their Infants' Weight Status and Beliefs about Their Foods and Physical Activity                                                 | Child Psychiatry and Human Development      | Jimenez-Cruz, A.              | - | + | + | * |  |  | 1 |   | 1 | Ineligible        |
| 136 | 2010 | Unexpectedly high early prevalence of anaemia in 6-month-old breast-fed infants in rural Bangladesh.                                                                        | Public health nutrition                     | Shakur, YA.                   | + | + | + | - |  |  | 1 |   | 1 | Ineligible        |
| 137 | 2010 | A prospective study of the effect of delivery type on neonatal weight gain pattern in exclusively breastfed neonates born in Shiraz, Iran.                                  | International breastfeeding journal         | Saki, A.                      | + | + | + | - |  |  | 1 | 1 |   | Ineligible        |
| 138 | 2010 | Determinants of early ponderal and statural growth in full-term infants in the EDEN mother-child cohort study.                                                              | The American journal of clinical nutrition  | Regnault, N.                  | + | + | + | - |  |  | 1 |   | 1 | Ineligible        |
| 139 | 2010 | Maternal depressive symptoms not associated with reduced height in young children in a US prospective cohort study.                                                         | PLOS One                                    | Ertel, KA.                    | + | + | + | - |  |  | 1 |   | 1 | Ineligible        |
| 140 | 2010 | Children who recover from early stunting and children who are not stunted demonstrate similar levels of cognition.                                                          | The Journal of nutrition                    | Crookston, BT.                | + | - | + | + |  |  | 1 | 1 |   | Ineligible        |
| 141 | 2010 | Maternal postnatal depression and children's growth and behaviour during the early years of life: exploring the interaction between physical and mental health.             | Archives of disease in childhood            | Avan, B.                      | + | + | + | - |  |  | 1 |   | 1 | Ineligible        |
| 142 | 2010 | Infant growth disparity in the Khanh Hoa province in Vietnam: a follow-up study.                                                                                            | BMC pediatrics                              | Vaktskjold, A.                | + | * | + | - |  |  | 1 |   | 1 | Ineligible        |
| 143 | 2010 | Dynamics of obesity and chronic health conditions among children and youth                                                                                                  | Journal of the American Medical Association | Van Cleave, J.                | + | - | + | + |  |  | 1 |   | 1 | Ineligible        |
| 144 | 2010 | The Generation R Study: Design and cohort update 2010                                                                                                                       | European Journal of Epidemiology            | Jaddoe, VVW.                  | - | + | + | - |  |  | 1 |   | 1 | Ineligible        |
| 145 | 2010 | Weight gain in the first two years of life is an important predictor of schooling outcomes in pooled analyses from five birth cohorts from low- and middle-income countries | Journal of Nutrition                        | Martorell R.                  | - | + | + | - |  |  | 1 |   | 1 | Ineligible        |



|     |      |                                                                                                                                                              |                                                |                        |   |   |   |   |   |   |   |   |  |   |                      |
|-----|------|--------------------------------------------------------------------------------------------------------------------------------------------------------------|------------------------------------------------|------------------------|---|---|---|---|---|---|---|---|--|---|----------------------|
| 146 | 2010 | Feeding choices and morbidity and mortality among children born to HIV-1 infected mothers during the first 6 months of life in Bobo-Dioulasso (Burkina Faso) | Journal of Pediatric Infectious Diseases       | Nacro, B.              | + | + | - | - |   |   | 1 |   |  | 1 | Ineligible           |
| 147 | 2010 | Infant growth during the first year of life and subsequent hospitalization to 8 years of age                                                                 | Epidemiology                                   | Hui, LL.               | + | + | + | - |   |   | 1 |   |  | 1 | Ineligible           |
| 148 | 2010 | Parental education and child health: Evidence from a natural experiment in taiwan                                                                            | American Economic Journal: Applied Economics   | Chou, SY.              | + | * | - | * |   |   | 1 |   |  | 1 | Ineligible           |
| 149 | 2010 | Growth patterns in early childhood and final attained stature: Data from five birth cohorts from low-and middle-income countries                             | American Journal of Human Biology              | Stein, AD.             | + | + | * | - |   |   | 1 |   |  | 1 | Ineligible           |
| 150 | 2010 | Poverty and childhood undernutrition in developing countries: A multi-national cohort study                                                                  | Social Science and Medicine                    | Petrou, S. & Kupek, E. | + | + | + | - |   |   | 1 |   |  | 1 | Ineligible           |
| 151 | 2010 | Prolonged episodes of acute diarrhea reduce growth and increase risk of persistent diarrhea in children                                                      | Gastroenterology                               | Moore, SR.             | + | + | + | - |   |   | 1 |   |  | 1 | Ineligible           |
| 152 | 2010 | Efects of breastfeeding and maternal smoking during pregnancy on body mas index (BMI) trajectories among children in canada                                  | Paediatrics and Child Health                   | Wilk, P.               | * | + | + | - |   |   |   |   |  | 1 | Ineligible           |
| 153 | 2010 | The relation of fetal alcohol exposure to growth and body composition in Cape Town, south African children                                                   | Alcoholism: Clinical and Experimental Research | Carter, RC.            | + | + | + | - |   |   | 1 |   |  | 1 | Ineligible           |
| 154 | 2011 | Infant Nutrition and 12 and 18 Months Secure Base Behavior: An Exploratory Study                                                                             | Infancy                                        | Wachs, TD.             | + | + | + | + | 1 |   |   |   |  | 1 | Continuous Education |
| 155 | 2011 | Racial Gaps in Early Childhood: Socio-Emotional Health, Developmental, and Educational Outcomes among African-American Boys. Report                          | National Center for Children in Poverty        | Aratani, Y.            | + | + | - | - |   |   | 1 |   |  | 1 | Ineligible           |
| 156 | 2011 | Parental and offspring adiposity associations: Insights from the 1958 British birth cohort                                                                   | Annals of Human Biology                        | Power, Ch.             | + | - | + | + |   |   | 1 |   |  | 1 | Ineligible           |
| 157 | 2011 | Associations between severity of obesity in childhood and adolescence, obesity onset and parental BMI: a longitudinal cohort study                           | International Journal of Obesity               | Svensson, V.           | + | - | + | * |   |   | 1 |   |  | 1 | Ineligible           |
| 158 | 2011 | Maternal smoking during pregnancy and offspring growth in childhood: 1993 and 2004 Pelotas cohort studies.                                                   | Archives of disease in childhood               | Matijasevic h, A.      | + | + | + | - |   |   | 1 |   |  | 1 | Ineligible           |
| 159 | 2011 | Does maternal autonomy influence feeding practices and infant growth in rural India?                                                                         | Social science & medicine (1982)               | Shroff, MR.            | - | + | + | + |   |   | 1 |   |  | 1 | Ineligible           |
| 160 | 2011 | Prenatal lead exposure and weight of 0- to 5-year-old children in Mexico city.                                                                               | Environmental health perspectives              | Afeiche, M.            | + | + | + | - |   |   | 1 |   |  | 1 | Ineligible           |
| 161 | 2011 | [Nutritional characteristics of newborns of overweight and obese mothers].                                                                                   | Anales de pediatria (Barcelona, Spain : 2003)  | Ayerza Casas, A.       | + | + | + | - |   |   | 1 |   |  | 1 | Ineligible           |
| 162 | 2011 | The impact of in utero exposure to diabetes on childhood body mass index growth trajectories: the EPOCH study.                                               | The Journal of pediatrics                      | Crume, TL.             | + | + | + | + |   | 1 |   |   |  | 1 | Special group cohort |
| 163 | 2011 | Socioeconomic status and weight gain in early infancy.                                                                                                       | International journal of obesity (2005)        | Wijlaars LP            | + | + | + | - |   |   | 1 |   |  | 1 | Ineligible           |
| 164 | 2011 | Expression of CYP19 and CYP17 is associated with leg length, weight, and BMI.                                                                                | Obesity (Silver Spring, Md.)                   | Yousefi, M.            | + | * | + | - |   |   | 1 | 1 |  |   | Ineligible           |

|     |      |                                                                                                                                                                                      |                                                   |                             |   |   |   |   |  |   |   |   |   |   |                      |
|-----|------|--------------------------------------------------------------------------------------------------------------------------------------------------------------------------------------|---------------------------------------------------|-----------------------------|---|---|---|---|--|---|---|---|---|---|----------------------|
| 165 | 2011 | Effects of prenatal and early life malnutrition: Evidence from the Greek famine                                                                                                      | Journal of Health Economics                       | Neelsen, S. & Stratmann, T. | + | + | - | * |  |   | 1 |   |   | 1 | Ineligible           |
| 166 | 2011 | Civil war, crop failure, and child stunting in Rwanda                                                                                                                                | Economic Development and Cultural Change          | Akresh, R.                  | * | * | + | - |  |   | 1 |   |   | 1 | Ineligible           |
| 167 | 2011 | Child care subsidies and childhood obesity                                                                                                                                           | Review of Economics of the Household              | Herbst, C M. & Tekin, E.    | + | * | + | - |  |   | 1 |   |   | 1 | Ineligible           |
| 168 | 2011 | Is the influence of early maternal menarche on offspring's rapid growth modified during in-utero? Finding from a population-based cohort of 57,296 child mother pairs in South China | Obesity                                           | Min, J.                     | + | + | + | - |  |   | 1 |   |   | 1 | Ineligible           |
| 169 | 2011 | Infant's growth through the first year of life and maternal pre-pregnancy body mass index                                                                                            | Annals of Nutrition and Metabolism                | Giovannini, M.              | + | + | + | - |  |   | 1 |   |   | 1 | Ineligible           |
| 170 | 2011 | Nutritional characteristics of infants from overweight and obese mothers                                                                                                             | International Journal of Obesity                  | Rodríguez Martínez, G.      | + | + | + | - |  |   | 1 |   |   | 1 | Ineligible           |
| 171 | 2011 | Effects of prenatal exposure to modern pesticides on birth weight, growth and body composition in childhood; Interactions with maternal smoking and PON1 gene-polymorphisms          | Hormone Research in Paediatrics                   | Wohlfahrt- Veje, C.         | + | + | + | - |  |   | 1 |   |   | 1 | Ineligible           |
| 172 | 2011 | The relationship between vitamin D, otitis media, and weight                                                                                                                         | Otolaryngology - Head and Neck Surgery            | Weinreich, H. & Daly, K.    | + | + | + | - |  |   | 1 | 1 |   |   | Ineligible           |
| 173 | 2011 | Factors influencing high rates of catch up growth after early childhood stunting in children of urban slums of southern India: A cohort study                                        | American Journal of Tropical Medicine and Hygiene | Lal, A.                     | + | + | + | - |  |   | 1 |   |   | 1 | Ineligible           |
| 174 | 2011 | Introduction to the IDEFICS study - obesity prevalence in European children                                                                                                          | International Journal of Obesity                  | Ahrens, W.                  | + | + | + | - |  |   | 1 |   |   | 1 | Ineligible           |
| 175 | 2011 | Impact of malaria in pregnancy on gestational age, birthweight and infant growth: A cohort study in Uganda                                                                           | Tropical Medicine and International Health        | De Beaudrap, P.             | + | + | + | + |  | 1 |   | 1 |   |   | Special group cohort |
| 176 | 2011 | Child care: Implications for overweight/obesity in Canadian children?                                                                                                                | Canadian Journal of Diabetes                      | McLaren, L.                 | * | - | + | * |  |   | 1 |   |   | 1 | Ineligible           |
| 177 | 2011 | Associations between the home and school environments and child body mass index                                                                                                      | Social Science and Medicine                       | Miller, DP.                 | + | - | + | * |  |   | 1 |   |   | 1 | Ineligible           |
| 178 | 2011 | The mothers and children's environmental health study (a multicenter longitudinal study in Korea)                                                                                    | Epidemiology                                      | Ha, EH.                     | + | + | * | - |  |   | 1 |   |   | 1 | Ineligible           |
| 179 | 2011 | Pointers to childhood obesity from a longitudinal study                                                                                                                              | Journal of Diabetes                               | Voss, LD.                   | + | * | + | - |  |   | 1 |   |   | 1 | Ineligible           |
| 180 | 2011 | Idefics study-obesity prevalence and risk factors in European children                                                                                                               | American Journal of Epidemiology                  | Ahrens, W. & Pigeot, I.     | * | - | + | + |  |   | 1 |   |   | 1 | Ineligible           |
| 181 | 2012 | Early Maternal Employment and Childhood Obesity among Economically Disadvantaged Families in the USA                                                                                 | Early Child Development and Care                  | Coley, RL.                  | + | - | + | * |  |   | 1 |   |   | 1 | Ineligible           |
| 182 | 2012 | Determinants of linear growth from infancy to school-aged years: a population-based follow-up study in urban Amazonian children                                                      | BMC Public Health                                 | Lourenco, BH.               | - | + | + | + |  | 1 |   |   | 1 |   | Ineligible           |
| 183 | 2012 | Maternal unemployment and childhood overweight: is there a relationship?                                                                                                             | Journal of Epidemiology and Community Health      | Stewart, L.                 | * | - | + | - |  |   | 1 |   |   | 1 | Ineligible           |

|     |      |                                                                                                                                                                                 |                                                                    |                         |   |   |   |   |  |   |   |   |   |                                  |
|-----|------|---------------------------------------------------------------------------------------------------------------------------------------------------------------------------------|--------------------------------------------------------------------|-------------------------|---|---|---|---|--|---|---|---|---|----------------------------------|
| 184 | 2012 | Using the WHO 2006 child growth standard to assess the growth and nutritional status of rural south Indian infants                                                              | Annals of Human Biology                                            | Johnson, W.             | - | + | + | + |  |   | 1 |   | 1 | Ineligible                       |
| 185 | 2012 | Maternal antecedents of infants with abnormal head sizes in southwest Nigeria: A community-based study.                                                                         | Journal of family & community medicine                             | Olusanya, BO.           | - | * | + | + |  |   | 1 |   | 1 | Ineligible                       |
| 186 | 2012 | Postnatal Growth Patterns in a Chilean Cohort: The Role of SES and Family Environment.                                                                                          | International journal of pediatrics                                | Kang Sim, D E.          | + | + | + | - |  |   | 1 |   | 1 | Ineligible                       |
| 187 | 2012 | Breastfeeding in HIV exposed infants significantly improves child health: a prospective study.                                                                                  | Maternal and child health journal                                  | Kindra, G.              | + | * | + | - |  |   | 1 |   | 1 | Ineligible                       |
| 188 | 2012 | Safety of tenofovir use during pregnancy: early growth outcomes in HIV-exposed uninfected infants.                                                                              | AIDS (London, England)                                             | Siberry, GK.            | + | + | + | - |  |   | 1 |   | 1 | Ineligible                       |
| 189 | 2012 | The association between early childhood overweight and maternal factors.                                                                                                        | Childhood obesity (Print)                                          | Barroso, CS.            | - | + | + | + |  |   | 1 |   | 1 | Ineligible                       |
| 190 | 2012 | Immigrant-native differences in child health: does maternal education narrow or widen the gap?                                                                                  | Child Development                                                  | Jackson, MI.            | + | - | * | * |  |   | 1 |   | 1 | Ineligible                       |
| 191 | 2012 | Race/Ethnic and Nativity Disparities in Child Overweight in the United States and England.                                                                                      | The Annals of the American Academy of Political and Social Science | Martinson, ML.          | + | - | + | + |  |   | 1 |   | 1 | Ineligible                       |
| 192 | 2012 | Social inequalities in height: persisting differences today depend upon height of the parents.                                                                                  | PLOS One                                                           | Galobardes, B.          | + | + | + | + |  | 1 |   |   | 1 | Duplication reference population |
| 193 | 2012 | Maternal experiences of racial discrimination and child weight status in the first 3 years of life.                                                                             | Journal of developmental origins of health and disease             | Dixon, B.               | + | + | + | - |  |   | 1 |   | 1 | Ineligible                       |
| 194 | 2012 | Growth parameters of NICU admitted low birth weight preterm neonates at corrected ages of 6 and 12 month.                                                                       | Iranian journal of reproductive medicine                           | Islami, Z.              | + | + | + | - |  |   | 1 |   | 1 | Ineligible                       |
| 195 | 2012 | Maternal depression and infant growth and development in British Pakistani women: a cohort study.                                                                               | BMJ open                                                           | Husain, N.              | + | + | + | - |  |   | 1 |   | 1 | Ineligible                       |
| 196 | 2012 | Physical growth during the first year of life. A longitudinal study in rural and urban areas of Hanoi, Vietnam.                                                                 | BMC pediatrics                                                     | Nguyen, HT.             | + | + | + | - |  |   | 1 | 1 |   | Ineligible                       |
| 197 | 2012 | Head circumference of infants born to mothers with different educational levels; the Generation R Study.                                                                        | PLOS One                                                           | Bouthoorn, SH.          | + | + | + | - |  |   | 1 |   | 1 | Ineligible                       |
| 198 | 2012 | A longitudinal study of food insecurity on obesity in preschool children.                                                                                                       | Journal of the Academy of Nutrition and Dietetics                  | Metallinos-Katsaras, E. | + | - | + | + |  |   | 1 |   | 1 | Ineligible                       |
| 199 | 2012 | The geographic accessibility of child care subsidies and evidence on the impact of subsidy receipt on childhood obesity                                                         | Journal of Urban Economics                                         | Herbst, CM. & Tekin, E. | + | * | + | - |  |   | 1 |   | 1 | Ineligible                       |
| 200 | 2012 | How parents' income, time and job quality affect children's health and development                                                                                              | Australian Journal of Social Issues                                | Nicholson, J M.         | * | * | - | + |  |   | 1 |   | 1 | Ineligible                       |
| 201 | 2012 | Trends in socioeconomic inequalities in anthropometric status in a population undergoing the nutritional transition: Data from 1982, 1993 and 2004 pelotas birth cohort studies | BMC Public Health                                                  | Matijasevic h, A.       | + | + | + | - |  |   | 1 |   | 1 | Ineligible                       |
| 202 | 2012 | Maternal smoking during pregnancy and effects on neonatal anthropometry: A prospective study                                                                                    | Turkish Journal of Medical Sciences                                | Bolat, F.               | + | - | + | * |  |   | 1 |   | 1 | Ineligible                       |
| 203 | 2012 | Wars and child health: Evidence from the Eritrean-Ethiopian conflict                                                                                                            | Journal of Development Economics                                   | Akresh, R.              | - | * | + | * |  |   | 1 |   | 1 | Ineligible                       |

|     |      |                                                                                                                                                                          |                                                   |                              |   |   |   |   |   |  |   |  |  |   |                   |
|-----|------|--------------------------------------------------------------------------------------------------------------------------------------------------------------------------|---------------------------------------------------|------------------------------|---|---|---|---|---|--|---|--|--|---|-------------------|
| 204 | 2012 | Elevated insulin concentrations at birth and at prepubescent age are associated with an altered BMI course during childhood-results of the ulm birth cohort study (UBCS) | Hormone Research in Paediatrics                   | Brandt, S.                   | + | * | + | - |   |  | 1 |  |  | 1 | Ineligible        |
| 205 | 2012 | Lessons learned from a secular trend of diarrheal diseases, risk factors and nutritional status in cohort studies of children in northeast of Brazil                     | American Journal of Tropical Medicine and Hygiene | Lima, AA.                    | + | * | + | - |   |  | 1 |  |  | 1 | Ineligible        |
| 206 | 2012 | Brief introduction of the collaboration work process and introduction and findings of birth cohort study from Moceh, Korea                                               | Epidemiology                                      | Ha, EH.                      | + | + | + | - |   |  | 1 |  |  | 1 | Ineligible        |
| 207 | 2012 | Socioeconomic disparities in trajectories of overweight in infancy and early childhood                                                                                   | Obesity Facts                                     | Schmidt Morgen, C.           | + | - | + | + |   |  | 1 |  |  | 1 | Ineligible        |
| 208 | 2012 | Rheumatoid arthritis disease activity during pregnancy affects the postnatal catch-up growth of the child                                                                | Arthritis and Rheumatism                          | de Steenwinke I FD           | + | + | + | - |   |  | 1 |  |  | 1 | Ineligible        |
| 209 | 2012 | Mercury levels in maternal and cord blood and attained weight through the 24months of life                                                                               | Epidemiology                                      | Kim, BM.                     | + | + | + | - |   |  | 1 |  |  | 1 | Ineligible        |
| 210 | 2012 | A fetal vocs exposure related to postnatal growth and neurobehavioral development in mothers and children's environmental health (MOCEH) study                           | Epidemiology                                      | Chang, M..                   | + | + | + | - |   |  | 1 |  |  | 1 | Ineligible        |
| 211 | 2012 | Bmi trajectories in minnesota: An analysis of a 35-year birth cohort                                                                                                     | American Journal of Epidemiology                  | Andrade, KE.                 | + | - | + | + |   |  | 1 |  |  | 1 | Ineligible        |
| 212 | 2012 | Maternal depression and child BMI: Longitudinal findings from a US sample                                                                                                | Pediatric Obesity                                 | Duarte, CS.                  | * | * | + | - |   |  | 1 |  |  | 1 | Ineligible        |
| 213 | 2012 | Health of children born to older mothers in the uk                                                                                                                       | Archives of Disease in Childhood                  | Sutcliffe, A.                | + | + | + | - |   |  | 1 |  |  | 1 | Ineligible        |
| 214 | 2012 | Sociodemographic factors as determinants of body mass index trajectories in childhood                                                                                    | Obesity Facts                                     | Kautiainen, S.               | + | + | + | + |   |  | 1 |  |  | 1 | Insufficient data |
| 215 | 2012 | Maternal Height and child growth: Intergenerational perspectives                                                                                                         | FASEB Journal                                     | Addo, OY.                    | + | + | + | - |   |  | 1 |  |  | 1 | Ineligible        |
| 216 | 2013 | Low maternal education is associated with increased growth velocity in the first year of life and in early childhood: the ABCD study                                     | European Journal of Pediatrics                    | den Berg, G.                 | + | + | + | + | 1 |  |   |  |  | 1 | Weight gain       |
| 217 | 2013 | Family Structure and Obesity among U.S. Children                                                                                                                         | Journal of Applied Research on Children           | Augustine, JM. & Kimbro, RT. | + | - | + | + |   |  | 1 |  |  | 1 | Ineligible        |
| 218 | 2013 | Socioeconomic status and trajectory of obesity from birth childhood: The early childhood longitudinal study-birth cohort.                                                | American Journal of Epidemiology                  | Jones-Smith, J.              | + | + | + | - |   |  | 1 |  |  | 1 | Ineligible        |
| 219 | 2013 | Stronger influence of maternal than paternal obesity on infant and early childhood body mass index: the Fels Longitudinal Study                                          | Pediatric Obesity                                 | Linabery, AM.                | + | + | + | - |   |  | 1 |  |  | 1 | Ineligible        |
| 220 | 2013 | Child and Adolescent Obesity and Employment Sector in Urban China                                                                                                        | Asian Population Studies                          | Li, Y.                       | * | * | + | - |   |  | 1 |  |  | 1 | Ineligible        |
| 221 | 2013 | Dollars and pounds: the impact of family income on childhood weight                                                                                                      | Applied Economics                                 | Chia, YF.                    | * | - | + | + |   |  | 1 |  |  | 1 | Ineligible        |
| 222 | 2013 | Breastfeeding duration, age of starting solids and high BMI risk and adiposity in Indian children.                                                                       | Maternal & child nutrition                        | Caleyachetty, A.             | + | * | + | - |   |  | 1 |  |  | 1 | Ineligible        |
| 223 | 2013 | Timing of solid food introduction and obesity: Hong Kong's "children of 1997" birth cohort.                                                                              | Pediatrics                                        | Lin, Sh. L.                  | + | + | + | - |   |  | 1 |  |  | 1 | Ineligible        |

|     |      |                                                                                                                                       |                                                    |                            |   |   |   |   |  |   |   |   |   |            |
|-----|------|---------------------------------------------------------------------------------------------------------------------------------------|----------------------------------------------------|----------------------------|---|---|---|---|--|---|---|---|---|------------|
| 224 | 2013 | Periods of child growth up to age 8 years in Ethiopia, India, Peru and Vietnam: key distal household and community factors.           | Social science & medicine (1982)                   | Schott, WB.                | + | + | - | * |  | 1 |   |   | 1 | Ineligible |
| 225 | 2013 | Relationship of exclusive breast feeding for 6 mo to linear growth up to 18 mo of age.                                                | Indian journal of pediatrics                       | Agarwal, KN.               | + | + | + | - |  |   | 1 |   | 1 | Ineligible |
| 226 | 2013 | The critical period of infant feeding for the development of early disparities in obesity.                                            | Social science & medicine (1982)                   | Thompson, AL.              | + | + | + | - |  |   | 1 |   | 1 | Ineligible |
| 227 | 2013 | Infant feeding practices and children's weight status.                                                                                | Canadian journal of dietetic practice and research | Rossiter, MD. & Evers, SE. | + | + | - | + |  |   | 1 |   | 1 | Ineligible |
| 228 | 2013 | Factors associated with morbidities among infants in three sub centre areas of belgaum district of South India: a longitudinal study. | Indian journal of community medicine               | Joseph N.                  | + | + | + | - |  |   | 1 |   | 1 | Ineligible |
| 229 | 2013 | Maternal HIV infection and other factors associated with growth outcomes of HIV-uninfected infants in Entebbe, Uganda.                | Public health nutrition                            | Muhangi L.                 | - | + | + | + |  |   | 1 |   | 1 | Ineligible |
| 230 | 2013 | Child Health, Maternal Marital and Socioeconomic Factors, and Maternal Health.                                                        | Journal of family issues                           | Garbarski, D. & Witt, WP.  | + | * | - | * |  |   | 1 | 1 |   | Ineligible |
| 231 | 2013 | Trajectories of socioeconomic inequalities in health, behaviours and academic achievement across childhood and adolescence.           | Journal of epidemiology and community health       | Howe, LD.                  | + | - | + | + |  |   | 1 | 1 |   | Ineligible |
| 232 | 2013 | Grandparental education, parental education and child height: evidence from Hong Kong's "Children of 1997" birth cohort.              | Annals of epidemiology                             | Kwok, MK.                  | + | + | - | + |  |   | 1 |   | 1 | Ineligible |
| 233 | 2013 | Trajectories of BMI from early childhood through early adolescence: SES and psychosocial predictors.                                  | British journal of health psychology               | Lane, SP.                  | + | + | + | - |  |   | 1 |   | 1 | Ineligible |
| 234 | 2013 | Critical windows for nutritional interventions against stunting                                                                       | American Journal of Clinical Nutrition             | Prentice, AM.              | - | + | + | * |  |   | 1 |   | 1 | Ineligible |
| 235 | 2013 | Factors predicting severe childhood obesity in kindergarteners                                                                        | International Journal of Obesity                   | Flores, G. & Lin, H.       | + | + | + | - |  |   | 1 |   | 1 | Ineligible |
| 236 | 2013 | The effect of breastfeeding in body composition of young children                                                                     | Journal of Human Growth and Development            | Corona, LP. & Conde, WL.   | - | + | + | * |  |   | 1 |   | 1 | Ineligible |
| 237 | 2013 | Unhealthy conditions? A longitudinal analysis of the health of children in one- and two-parent households                             | Comparative Population Studies                     | Brockmann, H.              | * | * | - | * |  |   | 1 |   | 1 | Ineligible |
| 238 | 2013 | Determinants of severe malnutrition of children and obstacles of its management at ouagadougou (Burkina faso)                         | Annals of Nutrition and Metabolism                 | Compaore, EWR.             | + | + | + | - |  |   | 1 |   | 1 | Ineligible |
| 239 | 2013 | Infant and young child feeding practices in rural India: A community based formative research                                         | FASEB Journal                                      | Anwar, F.                  | + | + | + | - |  |   | 1 |   | 1 | Ineligible |
| 240 | 2013 | Breast milk adiponectin is associated with maternal dietary intake and infant growth                                                  | Annals of Nutrition and Metabolism                 | Jan Mohamed, H J.          | + | + | + | - |  |   | 1 |   | 1 | Ineligible |
| 241 | 2013 | Family sociodemographic factors at birth as determinants of body mass index development of the offspring until 7 years of age         | European Journal of Epidemiology                   | Lehtinen-Jacks, S.         | + | + | + | - |  |   | 1 |   | 1 | Ineligible |
| 242 | 2013 | Fecundability in women born preterm                                                                                                   | American Journal of Epidemiology                   | Wildenschild, C.           | * | * | * | - |  |   | 1 |   | 1 | Ineligible |
| 243 | 2013 | When obesity begins: Anthropometric and demographic characteristics of California WIC child participants                              | FASEB Journal                                      | Papathakis, PC.            | + | + | + | - |  |   | 1 |   | 1 | Ineligible |

|     |      |                                                                                                                                                                                                   |                                                                  |                          |   |   |   |   |   |  |   |  |  |   |                      |
|-----|------|---------------------------------------------------------------------------------------------------------------------------------------------------------------------------------------------------|------------------------------------------------------------------|--------------------------|---|---|---|---|---|--|---|--|--|---|----------------------|
| 244 | 2013 | Impact of assisted reproduction techniques (ART) on the health of newborns. Preliminary results of the spanish group of assisted reproduction tecniques and the health of newborn group (trasarn) | Journal of Neonatal-Perinatal Medicine                           | López-Azorín, M.         | + | + | * | - |   |  | 1 |  |  | 1 | Ineligible           |
| 245 | 2013 | Parental feeding practices and their association with growth trajectories in a Portuguese Birth Cohort during the first years of life                                                             | European Journal of Epidemiology                                 | Severo, M.               | + | + | + | - |   |  | 1 |  |  | 1 | Ineligible           |
| 246 | 2013 | Unpredicted growth from ages 1 to 5 and 5 to 8 years in Ethiopia, India, Peru and Vietnam: Key distal household and community factors                                                             | FASEB Journal                                                    | Crookston, BT.           | + | + | + | - |   |  | 1 |  |  | 1 | Ineligible           |
| 247 | 2013 | Relapses from acute malnutrition in a community-based management program in burkina-faso                                                                                                          | Annals of Nutrition and Metabolism                               | Somasse, YE.             | + | * | + | - |   |  | 1 |  |  | 1 | Ineligible           |
| 248 | 2013 | Impact of maternal depressive symptoms and infant temperament on early infant growth and motor development: Results from a population based study in bangladesh                                   | Archives of Women's Mental Health                                | Nasreen, HE.             | + | + | + | + | 1 |  |   |  |  | 1 | Continuous Education |
| 249 | 2013 | Hospital support for malnourished children                                                                                                                                                        | Annals of Nutrition and Metabolism                               | Ousmane, O.              | * | * | + | - |   |  | 1 |  |  | 1 | Ineligible           |
| 250 | 2013 | Adiposity of healthy, full-term breast-fed and formula-fed infants: A prospective cohort study                                                                                                    | Archives of Disease in Childhood: Education and Practice Edition | Gale, C.                 | + | + | + | - |   |  | 1 |  |  | 1 | Ineligible           |
| 251 | 2013 | Impact of perinatal different intrauterine environments on child growth and development in the first six months of life-ivapsa birth cohort                                                       | Annals of Nutrition and Metabolism                               | Bernardi JR.             | + | + | * | - |   |  | 1 |  |  | 1 | Ineligible           |
| 252 | 2013 | Trajectories and predictors of developmental skills in healthy twins up to 24 months of age                                                                                                       | Infant Behavior & Development                                    | Nan, C.                  | + | * | + | - |   |  | 1 |  |  | 1 | Ineligible           |
| 253 | 2013 | Intergenerational and socioeconomic gradients of child obesity                                                                                                                                    | Social Science & Medicine                                        | Costa-Font, J.           | - | - | + | + |   |  | 1 |  |  | 1 | Ineligible           |
| 254 | 2013 | Influence of feeding, parental anthropometry, socio-cultural and perinatal aspects on infant body size in spain                                                                                   | Annals of Nutrition and Metabolism                               | Oves, B.                 | + | + | + | + |   |  | 1 |  |  | 1 | Insufficient data    |
| 255 | 2013 | Maternal smoking and the impact on infant weight at 9 months                                                                                                                                      | Journal of Women's Health                                        | Braid, S.                | + | + | + | - |   |  | 1 |  |  | 1 | Ineligible           |
| 256 | 2013 | Child's sleep problems and risk of childhood overweight: A longitudinal study                                                                                                                     | American Journal of Epidemiology                                 | Wang, L. & Alamian, A.   | + | + | + | - |   |  | 1 |  |  | 1 | Ineligible           |
| 257 | 2014 | Association between socioeconomic household level and z-score of BMI in children: results of a longitudinal study (624.14)                                                                        | The FASEB Journal                                                | Liria, M.                | + | - | + | + |   |  | 1 |  |  | 1 | Ineligible           |
| 258 | 2014 | Socioeconomic status and trajectory of overweight from birth to mid-childhood: the early childhood longitudinal study-birth cohort                                                                | PLOS One                                                         | Jones-Smith, JC.         | + | + | + | - |   |  | 1 |  |  | 1 | Ineligible           |
| 259 | 2014 | Breastfeeding offers protection against obesity in children of recently immigrated Latina women.                                                                                                  | Journal of community health                                      | Verstraete, SG.          | + | - | + | + |   |  | 1 |  |  | 1 | Ineligible           |
| 260 | 2014 | Maternal HIV is associated with reduced growth in the first year of life among infants in the Eastern region of Ghana: the Research to Improve Infant Nutrition and Growth (RIING) Project.       | Maternal & child nutrition                                       | Lartey, A.               | + | + | + | - |   |  | 1 |  |  | 1 | Ineligible           |
| 261 | 2014 | Diet and growth in infancy: relationship to socioeconomic background and to health and development in the Avon Longitudinal Study of Parents and Children.                                        | Nutrition reviews                                                | Emmett, PM. & Jones, LR. | + | + | + | - |   |  | 1 |  |  | 1 | Ineligible           |
| 262 | 2014 | Socioeconomic differences in childhood length/height trajectories in a middle-income country: a cohort study.                                                                                     | BMC public health                                                | Patel, R.                | - | + | + | + | 1 |  |   |  |  | 1 | Ineligible           |

|     |      |                                                                                                                                                                |                                        |                            |   |   |   |   |   |  |   |   |   |                      |
|-----|------|----------------------------------------------------------------------------------------------------------------------------------------------------------------|----------------------------------------|----------------------------|---|---|---|---|---|--|---|---|---|----------------------|
| 263 | 2014 | Socioeconomic status, infant feeding practices and early childhood obesity.                                                                                    | Pediatric obesity                      | Gibbs, BG. & Forste, R.    | + | + | + | - |   |  | 1 |   | 1 | Ineligible           |
| 264 | 2014 | Effect of tobacco smoke exposure during pregnancy and preschool age on growth from birth to adolescence: a cohort study.                                       | BMC pediatrics                         | Muraro, AP.                | + | - | + | + |   |  | 1 |   | 1 | Ineligible           |
| 265 | 2014 | Determinants of infant formula use and relation with growth in the first 4 months.                                                                             | Maternal & child nutrition             | Betoko A.                  | + | + | + | - |   |  | 1 |   | 1 | Ineligible           |
| 266 | 2014 | Neighbourhood deprivation, individual-level familial and socio-demographic factors and diagnosed childhood obesity: a nationwide multilevel study from Sweden. | Obesity facts                          | Li, X.                     | + | - | + | + |   |  | 1 |   | 1 | Ineligible           |
| 267 | 2014 | PREVALENCE OF ACUTE MALNUTRITION IN PRE-SCHOOL CHILDREN IN A RURAL AREA OF NORTHERN SUDAN.                                                                     | East African medical journal           | Mohamed, S. & Hussein, MD. | - | * | + | * |   |  | 1 |   | 1 | Ineligible           |
| 268 | 2014 | The MAL-ED cohort study in Mirpur, Bangladesh.                                                                                                                 | Clinical infectious diseases           | Ahmed T.                   | - | * | + | - |   |  | 1 |   | 1 | Ineligible           |
| 269 | 2014 | How resource dynamics explain accumulating developmental and health disparities for teen parents' children.                                                    | Demography                             | Mollborn, S.               | + | * | - | + |   |  | 1 |   | 1 | Ineligible           |
| 270 | 2014 | Socioeconomic determinants of infant growth: The Perspective Cohort Study of Thai Children.                                                                    | Japan journal of nursing science       | Phuphaibul, R.             | + | + | + | + | 1 |  |   |   | 1 | Continuous Education |
| 271 | 2014 | [Nutritional deficit in children in a major city of the interior of the state of Bahia, Brazil].                                                               | Ciencia & saude coletiva               | de Jesus, GM.              | + | - | + | * |   |  | 1 |   | 1 | Ineligible           |
| 272 | 2014 | Dietary diversity at 6 months of age is associated with subsequent growth and mediates the effect of maternal education on infant growth in urban Zambia.      | The Journal of nutrition               | Mallard, SR.               | - | + | + | + |   |  | 1 |   | 1 | Ineligible           |
| 273 | 2014 | Overweight in infancy: which pre- and perinatal factors determine overweight persistence or reduction? A birth cohort followed for 11 years.                   | Annals of nutrition & metabolism       | van Rossem, L.             | + | - | + | + |   |  | 1 |   | 1 | Ineligible           |
| 274 | 2014 | The role of early life factors in the development of ethnic differences in growth and overweight in preschool children: a prospective birth cohort.            | BMC public health                      | van Rossem, L.             | + | - | + | * |   |  | 1 |   | 1 | Ineligible           |
| 275 | 2014 | Height-for-age z scores increase despite increasing height deficits among children in 5 developing countries                                                   | American Journal of Clinical Nutrition | Lundeen, EA.               | + | + | + | - |   |  | 1 |   | 1 | Ineligible           |
| 276 | 2014 | Associations between infant feeding and the size, tempo and velocity of infant weight gain: SITAR analysis of the Gemini twin birth cohort                     | International Journal of Obesity       | Johnson, L.                | + | + | + | - |   |  | 1 | 1 |   | Ineligible           |
| 277 | 2014 | Effect of breastfeeding on childhood BMI and obesity: The China family panel studies                                                                           | Medicine (United States)               | Jing, H.                   | * | * | + | - |   |  | 1 |   | 1 | Ineligible           |
| 278 | 2014 | Is breast truly best? Estimating the effects of breastfeeding on long-term child health and wellbeing in the United States using sibling comparisons           | Social Science and Medicine            | Colen, CG. & Ramey, DM.    | * | - | - | * |   |  | 1 |   | 1 | Ineligible           |
| 279 | 2014 | The causal effect of family income on child health in the UK                                                                                                   | Journal of Health Economics            | Kuehnle, D.                | + | * | - | * |   |  | 1 |   | 1 | Ineligible           |
| 280 | 2014 | Important periods of weight development in childhood: A population-based longitudinal study                                                                    | BMC Public Health                      | Glavin, K.                 | + | * | - | - |   |  | 1 |   | 1 | Ineligible           |
| 281 | 2014 | Prenatal influences on size, velocity and tempo of infant growth: Findings from three contemporary cohorts                                                     | PLOS One                               | Pizzi, C.                  | + | + | + | - |   |  | 1 |   | 1 | Ineligible           |
| 282 | 2014 | Modeling environmental influences on child growth in the MAL-ED cohort study: Opportunities and challenges                                                     | Clinical Infectious Diseases           | Richard SA.                | + | + | + | - |   |  | 1 |   | 1 | Ineligible           |
| 283 | 2014 | Longitudinal study of alcohol-exposed infants and toddlers in south African communities                                                                        | Alcoholism: Clinical and               | Kalberg, WO.               | * | + | + | * |   |  | 1 |   | 1 | Special group cohort |

|            |      |                                                                                                                                                                                           |                                                        |                          |   |   |   |   |   |   |   |   |  |  |   |  |                      |
|------------|------|-------------------------------------------------------------------------------------------------------------------------------------------------------------------------------------------|--------------------------------------------------------|--------------------------|---|---|---|---|---|---|---|---|--|--|---|--|----------------------|
|            |      |                                                                                                                                                                                           | Experimental Research                                  |                          |   |   |   |   |   |   |   |   |  |  |   |  |                      |
| <b>284</b> | 2014 | Prevalence of weight for age > 90th percentile and z-score > 2 for healthy children ages 6 months to 2 years in a pediatric clinic                                                        | Journal of Investigative Medicine                      | Petty, M.                | * | + | + | - |   |   | 1 |   |  |  | 1 |  | Ineligible           |
| <b>285</b> | 2014 | The role of maternal vitamin d status in fetal and neonatal growth                                                                                                                        | Reproductive Sciences                                  | Salari, K.               | + | + | + | - |   |   | 1 |   |  |  | 1 |  | Ineligible           |
| <b>286</b> | 2014 | What money can buy: Family income and childhood obesity                                                                                                                                   | Economics and Human Biology                            | Jo, Y.                   | * | * | + | - |   |   | 1 |   |  |  | 1 |  | Ineligible           |
| <b>287</b> | 2014 | Body Mass Index Development from Birth to Early Adolescence; Effect of Perinatal Characteristics and Maternal Migration Background in a Swedish Cohort                                    | PLOS ONE                                               | Pour, MB.                | + | + | + | - |   |   | 1 |   |  |  | 1 |  | Ineligible           |
| <b>288</b> | 2014 | Changes in family income status and the development of overweight and obesity from 2 to 15 years: a longitudinal study                                                                    | BMC Public Health                                      | Demment, MM.             | + | + | + | - |   |   | 1 |   |  |  | 1 |  | Ineligible           |
| <b>289</b> | 2014 | Beverage Intake in Early Childhood and Change in Body Fat from Preschool to Adolescence                                                                                                   | Childhood obesity                                      | Hasnain, SR.             | + | * | + | - |   |   | 1 |   |  |  | 1 |  | Ineligible           |
| <b>290</b> | 2014 | IVF conceived children Health: A retrospective growth study                                                                                                                               | Human Reproduction                                     | Boyer Gervoise, M.       | + | + | + | - |   |   | 1 |   |  |  | 1 |  | Ineligible           |
| <b>291</b> | 2014 | Caesarean delivery, caesarean delivery on maternal request and childhood overweight: A Chinese birth cohort study of 181380 children                                                      | Pediatric Obesity                                      | Li, H.                   | + | - | + | + |   |   | 1 |   |  |  | 1 |  | Ineligible           |
| <b>292</b> | 2014 | Postnatal growth patterns of preterm and late term infants, and differences in this according to maternal education                                                                       | Journal of Paediatrics and Child Health                | Howe, LD.                | + | * | + | + |   |   | 1 |   |  |  | 1 |  | Insufficient data    |
| <b>293</b> | 2015 | Association between maternal age at childbirth and child and adult outcomes in the off spring: a prospective study in five low-income and middle-income countries (COHORTS collaboration) | The Lancet. Global health                              | Fall CH.                 | + | + | + | + | 1 |   |   |   |  |  | 1 |  | Insufficient data    |
| <b>294</b> | 2015 | Determinants of Weight Gain during the First Two Years of Life-The GECKO Drenthe Birth Cohort                                                                                             | PLOS ONE                                               | Küpers LK.               | + | + | + | + | 1 |   |   | 1 |  |  |   |  | Insufficient data    |
| <b>295</b> | 2015 | Longitudinal relations between children's sleep and body mass index: the moderating role of socioeconomic risk                                                                            | Sleep Health: Journal of the National Sleep Foundation | Bagley, EJ.              | * | - | + | * |   |   | 1 |   |  |  | 1 |  | Ineligible           |
| <b>296</b> | 2015 | Influence of early life factors on body mass index trajectory during childhood: a population-based longitudinal analysis in the Western Brazilian Amazon                                  | Maternal & Child Nutrition                             | Lourenço BH.             | + | + | + | - |   |   | 1 |   |  |  | 1 |  | Ineligible           |
| <b>297</b> | 2015 | Associations between gestational anthropometry, maternal HIV, and fetal and early infancy growth in a prospective rural/semi-rural Tanzanian cohort, 2012-13.                             | BMC pregnancy and childbirth                           | Wilkinson, AL.           | + | + | + | + |   | 1 |   |   |  |  | 1 |  | Special group cohort |
| <b>298</b> | 2015 | Child Weight Growth Chart and Its Associated Factors in Birth Cohort of Maku Using a Growth Curve Model and LMS Method.                                                                   | Global journal of health science                       | Ayatollahi, SMT          | + | + | + | - |   |   | 1 |   |  |  | 1 |  | Ineligible           |
| <b>299</b> | 2015 | Maternal obesity and offspring dietary patterns at 9 months of age.                                                                                                                       | European journal of clinical nutrition                 | Andersen, LBB.           | + | + | + | - |   |   | 1 |   |  |  | 1 |  | Ineligible           |
| <b>300</b> | 2015 | The association of exposure to the 2009 south war with the physical, psychological, and family well-being of Saudi children.                                                              | Saudi medical journal                                  | El Hatw, MM.             | + | - | + | * |   |   | 1 |   |  |  | 1 |  | Ineligible           |
| <b>301</b> | 2015 | Maternal ratings of child health and child obesity, variations by mother's race/ethnicity and nativity.                                                                                   | Maternal and child health journal                      | Baker, EH. & Altman, CE. | + | * | + | - |   |   | 1 |   |  |  | 1 |  | Ineligible           |



|     |      |                                                                                                                                                                         |                                                     |                         |   |   |   |   |  |   |   |  |  |   |                   |
|-----|------|-------------------------------------------------------------------------------------------------------------------------------------------------------------------------|-----------------------------------------------------|-------------------------|---|---|---|---|--|---|---|--|--|---|-------------------|
| 302 | 2015 | Body mass index trajectories from ages 1 to 20: Results from two nationally representative canadian longitudinal cohorts.                                               | Obesity (Silver Spring, Md.)                        | Tu, AW.                 | * | - | + | * |  |   | 1 |  |  | 1 | Ineligible        |
| 303 | 2015 | The Relationship Between Maternal Education and Child Health Outcomes in Urban Australian Children in the First 12 Months of Life.                                      | Maternal and child health journal                   | Davey, TM.              | + | + | - | + |  |   | 1 |  |  | 1 | Ineligible        |
| 304 | 2015 | Ethnic differences in risk factors for obesity in New Zealand infants.                                                                                                  | Journal of epidemiology and community health        | Howe, LD.               | + | + | + | - |  |   | 1 |  |  | 1 | Ineligible        |
| 305 | 2015 | Breastfeeding duration and weight gain trajectory in infancy.                                                                                                           | Pediatrics                                          | Carling, SJ.            | + | + | + | + |  | 1 |   |  |  | 1 | Growth trajectory |
| 306 | 2015 | Parental weight changes as key predictors of child weight changes.                                                                                                      | BMC public health                                   | Andriani, H.            | + | + | + | - |  |   | 1 |  |  | 1 | Ineligible        |
| 307 | 2015 | Early child care and obesity at 12 months of age in the Danish National Birth Cohort                                                                                    | International Journal of Obesity                    | Benjamin N.             | + | + | + | - |  |   | 1 |  |  | 1 | Ineligible        |
| 308 | 2015 | Short-term and long-term associations between household wealth and physical growth: A cross-comparative analysis of children from four low- and middle-income countries | Global Health Action                                | Krishna, A.             | + | + | + | - |  |   | 1 |  |  | 1 | Ineligible        |
| 309 | 2015 | Overweight/obesity and human capital formation from infancy to adolescence: Evidence from two large US cohorts                                                          | Journal of Biosocial Science                        | Murasko, JE.            | + | + | - | * |  |   | 1 |  |  | 1 | Ineligible        |
| 310 | 2015 | Maternal mental health, and child growth and development, in four low-income and middle-income countries                                                                | Journal of Epidemiology and Community Health        | Bennett, IM.            | + | + | + | - |  |   | 1 |  |  | 1 | Ineligible        |
| 311 | 2015 | The optimal postnatal growth trajectory for term small for gestational age babies: A prospective cohort study                                                           | Journal of Pediatrics                               | Lei, X.                 | + | + | + | - |  |   | 1 |  |  | 1 | Ineligible        |
| 312 | 2015 | Growth patterns in the first year of life differ in infants born to perinatally vs. Nonperinatally HIV-infected women                                                   | AIDS                                                | Jao, J.                 | + | + | + | - |  |   | 1 |  |  | 1 | Ineligible        |
| 313 | 2015 | Growth of Indonesian infants compared with world health organization growth standards                                                                                   | Journal of Pediatric Gastroenterology and Nutrition | Dwipoerwanto, PG.       | + | + | + | - |  |   | 1 |  |  | 1 | Ineligible        |
| 314 | 2015 | Internal migration, international migration, and physical growth of left-behind children: A study of two settings                                                       | Health and Place                                    | Lu, Y                   | - | * | + | * |  |   | 1 |  |  | 1 | Ineligible        |
| 315 | 2015 | Impact of maternal obesity, gestational diabetes, gestational weight gain, and breastfeeding on childhood obesity at age 2 years                                        | Diabetes                                            | Bider, Z.               | + | + | + | - |  |   | 1 |  |  | 1 | Ineligible        |
| 316 | 2015 | Cardiovascular disease risk factors and obesity modelling among indian children: Findings from two ethnic groups of India                                               | Atherosclerosis                                     | Bhasin, P. & Kapoor, S. | * | + | + | - |  |   | 1 |  |  | 1 | Ineligible        |
| 317 | 2015 | A survival analysis approach to assess the association between maternal prepregnancy overweight and childhood overweight: Results of the ulm birth cohort study (UBCS)  | Hormone Research in Paediatrics                     | Brandt, S.              | + | + | + | - |  |   | 1 |  |  | 1 | Ineligible        |
| 318 | 2015 | Effect of air pollution on children's growth over the follow-up period of 24-Å months: Mothers and childreng's environmental health study                               | European Journal of Epidemiology                    | Kim, E.                 | + | + | + | - |  |   | 1 |  |  | 1 | Ineligible        |
| 319 | 2015 | Not weight status but parental education and perception of weight and health are related to health related quality of life in children and adolescents                  | Obesity Facts                                       | Ligthart, KA.           | + | + | * | - |  |   | 1 |  |  | 1 | Ineligible        |
| 320 | 2015 | Prenatal Exposure to Traffic Pollution: Associations with Reduced Fetal Growth and Rapid Infant Weight Gain                                                             | Epidemiology                                        | Fleisch, AF.            | + | + | + | - |  |   | 1 |  |  | 1 | Ineligible        |
| 321 | 2015 | Maternal Cultural Orientation and Child Growth in New Zealand Pacific Families                                                                                          | Childhood Obesity                                   | Tseng, M.               | + | + | + | - |  |   | 1 |  |  | 1 | Ineligible        |

|     |      |                                                                                                                                                    |                                                 |                       |   |   |   |   |   |   |   |   |  |   |                      |
|-----|------|----------------------------------------------------------------------------------------------------------------------------------------------------|-------------------------------------------------|-----------------------|---|---|---|---|---|---|---|---|--|---|----------------------|
| 322 | 2015 | Variation in Child Body Mass Index Patterns by Race/Ethnicity and Maternal Nativity Status in the United States and England                        | Maternal and Child Health Journal               | Martinson, ML.        | + | - | + | + |   |   | 1 |   |  | 1 | Ineligible           |
| 323 | 2015 | The role of maternal education in child health: Evidence from a compulsory schooling law                                                           | Economics of Education Review                   | Guenes, PM.           | - | * | + | + |   |   | 1 |   |  | 1 | Ineligible           |
| 324 | 2015 | Early Changes in Socioeconomic Status Do Not Predict Changes in Body Mass in the First Decade of Life                                              | Annals of Behavioral Medicine                   | Starkey, L.           | + | - | + | + |   |   | 1 |   |  | 1 | Ineligible           |
| 325 | 2015 | Association between parental socioeconomic status with underweight and obesity in children from two Spanish birth cohorts: a changing relationship | Annals of Behavioral Medicine                   | Martinez-Vizcaino, V. | * | - | + | + |   |   | 1 |   |  | 1 | Ineligible           |
| 326 | 2016 | Causal pathways between socioeconomic disadvantage and growth in the Scottish Longitudinal Study, 1991-2001                                        | PLOS One                                        | Silverwood, RJ.       | + | - | + | + |   |   | 1 |   |  | 1 | Ineligible           |
| 327 | 2016 | Mediating Pathways in the Socio-Economic Gradient of Child Development: Evidence from Children 6-42 Months in Bogota                               | International Journal of Behavioral Development | Rubio-Codina, M.      | * | + | - | + |   |   | 1 |   |  | 1 | Ineligible           |
| 328 | 2016 | Disentangling the longitudinal relations of race, sex, and socioeconomic status, for childhood body mass index trajectories                        | Journal of pediatric psychology                 | Banks, GG.            | + | - | + | - |   |   | 1 |   |  | 1 | Ineligible           |
| 329 | 2016 | [Research on the social determinants of malnutrition among children under the age of 5 in China].                                                  | Beijing Da Xue Xue Bao Yi Xue Ban.              | Man, S Lm. & Guo, Y.  | * | - | + | + |   |   | 1 |   |  | 1 | Ineligible           |
| 330 | 2016 | The Linked CENTURY Study: linking three decades of clinical and public health data to examine disparities in childhood obesity.                    | BMC pediatrics                                  | Hawkins, SSh.         | * | + | - | - |   |   | 1 |   |  | 1 | Ineligible           |
| 331 | 2016 | Early growth in preterm infants after hospital discharge in rural Kenya: longitudinal study.                                                       | The Pan African medical journal                 | Sammy, DM.            | + | + | + | + |   | 1 |   |   |  | 1 | Special group cohort |
| 332 | 2016 | Development of a New Growth Standard for Breastfed Chinese Infants: What Is the Difference from the WHO Growth Standards?                          | PLOS One                                        | Huang, X.             | + | + | + | - |   |   | 1 |   |  | 1 | Ineligible           |
| 333 | 2016 | Patterns and Determinants of Double-Burden of Malnutrition among Rural Children: Evidence from China.                                              | PLOS One                                        | Zhang, N.             | + | - | + | + |   |   | 1 |   |  | 1 | Ineligible           |
| 334 | 2016 | Brief Report: Maternal Age of Menarche and Adiposity: Evidence from Hong Kong's "Children of 1997" Birth Cohort.                                   | Epidemiology (Cambridge, Mass.)                 | Lai, TCh.             | + | * | + | - |   |   | 1 |   |  | 1 | Ineligible           |
| 335 | 2016 | INTERGENERATIONAL EDUCATIONAL ATTAINMENT, FAMILY CHARACTERISTICS AND CHILD OBESITY.                                                                | Journal of biosocial science                    | Jones, A.             | * | - | + | * |   |   | 1 |   |  | 1 | Ineligible           |
| 336 | 2016 | Influence of early-life and parental factors on childhood overweight and obesity.                                                                  | Journal of endocrinological investigation       | Parrino, C.           | - | - | + | + |   |   | 1 |   |  | 1 | Ineligible           |
| 337 | 2016 | Protein and Micronutrient Intakes Are Associated with Child Growth and Morbidity from Infancy to Adulthood in the Philippines.                     | The Journal of nutrition                        | Bhargava, A.          | + | + | + | + | 1 |   |   |   |  | 1 | Continuous Education |
| 338 | 2016 | Stunted at 10 Years. Linear Growth Trajectories and Stunting from Birth to Pre-Adolescence in a Rural Bangladeshi Cohort.                          | PLOS One                                        | Svefors, P.           | + | - | + | + |   |   | 1 | 1 |  |   | Ineligible           |
| 339 | 2016 | The Independent and Cumulative Effect of Early Life Risk Factors on Child Growth: A Preliminary Report.                                            | Childhood obesity (Print)                       | Musaad, SMA.          | + | + | + | + |   | 1 |   | 1 |  |   | Growth trajectory    |
| 340 | 2016 | Linear growth trajectories in Zimbabwean infants.                                                                                                  | The American journal of clinical nutrition      | Gough, EK.            | + | + | + | + |   | 1 |   |   |  | 1 | Growth trajectory    |
| 341 | 2016 | Comparison of Obesity Rates in Early Childhood (4 to 80 months) by Parental Socioeconomic Status Using National Cohort Dataset in Korea.           | Asian nursing research                          | Lee, I.               | + | + | + | - |   |   | 1 |   |  | 1 | Ineligible           |

|     |      |                                                                                                                                                                                                                  |                                                              |                                |   |   |   |   |  |  |   |  |   |   |            |
|-----|------|------------------------------------------------------------------------------------------------------------------------------------------------------------------------------------------------------------------|--------------------------------------------------------------|--------------------------------|---|---|---|---|--|--|---|--|---|---|------------|
| 342 | 2016 | Growth and obesity through the first 7 y of life in association with levels of maternal glycemia during pregnancy: a prospective cohort study.                                                                   | The American journal of clinical nutrition                   | Zhu Y.                         | + | + | + | - |  |  | 1 |  |   | 1 | Ineligible |
| 343 | 2016 | Predominantly nighttime feeding and weight outcomes in infants.                                                                                                                                                  | The American journal of clinical nutrition                   | Cheng TS.                      | + | + | + | - |  |  | 1 |  | 1 |   | Ineligible |
| 344 | 2016 | Early childhood obesity: Association with healthcare expenditure in Australia.                                                                                                                                   | Obesity (Silver Spring, Md.)                                 | Hayes, A.                      | + | + | + | - |  |  | 1 |  |   | 1 | Ineligible |
| 345 | 2016 | Feeding practices and nutritional status of HIV-exposed and HIV-unexposed infants in the Western Cape.                                                                                                           | Southern African journal of HIV medicine                     | Rossouw, ME.                   | + | + | + | - |  |  | 1 |  |   | 1 | Ineligible |
| 346 | 2016 | Infertility treatment and children's longitudinal growth between birth and 3 years of age.                                                                                                                       | Human reproduction (Oxford, England)                         | Yeung, EH.                     | + | + | + | - |  |  | 1 |  |   | 1 | Ineligible |
| 347 | 2016 | Rural–Urban Child Height for Age Trajectories and Their Heterogeneous Determinants in Four Developing Countries                                                                                                  | Population Research and Policy Review                        | Nolan, LB.                     | * | - | + | - |  |  | 1 |  |   | 1 | Ineligible |
| 348 | 2016 | Short- and long-run associations between birth weight and children's height                                                                                                                                      | Economics and Human Biology                                  | Krishna, A.                    | + | + | + | - |  |  | 1 |  |   | 1 | Ineligible |
| 349 | 2016 | Social protection for all ages? Impacts of Ethiopia's Productive Safety Net Program on child nutrition                                                                                                           | Social Science and Medicine                                  | Porter, C. & Goyal, R.         | * | * | + | - |  |  | 1 |  |   | 1 | Ineligible |
| 350 | 2016 | Maternal Education and Investments in Children's Health                                                                                                                                                          | Journal of Marriage and Family                               | Prickett, KC. & Augustine, JM. | + | + | - | + |  |  | 1 |  |   | 1 | Ineligible |
| 351 | 2016 | Growth and development in children born very low birthweight                                                                                                                                                     | Archives of Disease in Childhood: Fetal and Neonatal Edition | Scharf, RJ.                    | + | + | + | - |  |  | 1 |  |   | 1 | Ineligible |
| 352 | 2016 | Growth references of preschool children based on the Taiwan Birth Cohort Study and compared to World Health Organization growth standards                                                                        | Pediatrics and Neonatology                                   | Li, YF.                        | * | + | + | - |  |  | 1 |  |   | 1 | Ineligible |
| 353 | 2016 | Assessing the impact of maternal exposure to drought on child growth                                                                                                                                             | Journal of Pediatric Gastroenterology and Nutrition          | Phiri, TE.                     | + | * | + | - |  |  | 1 |  |   | 1 | Ineligible |
| 354 | 2016 | BMI and food behavior in a cohort of Russian young children aged 12-35 months                                                                                                                                    | Journal of Pediatric Gastroenterology and Nutrition          | Surzhik, A.                    | + | + | + | - |  |  | 1 |  |   | 1 | Ineligible |
| 355 | 2016 | Predictors of improved HAZ in rural Egyptian children                                                                                                                                                            | FASEB Journal                                                | Winham, DM.                    | + | + | + | - |  |  | 1 |  |   | 1 | Ineligible |
| 356 | 2016 | Is there an association between growth trajectory or season of birth with Tourette syndrome (TS) or chronic tic disorder (CT)? findings from the avon longitudinal study of parents and children (ALSPAC) cohort | Developmental Medicine and Child Neurology                   | Rattihalli, RR.                | + | + | + | - |  |  | 1 |  |   | 1 | Ineligible |
| 357 | 2016 | The impact of cord blood leptin levels on growth in early infancy                                                                                                                                                | Placenta                                                     | McDonald, E.                   | + | + | + | - |  |  | 1 |  |   | 1 | Ineligible |
| 358 | 2016 | Risk and resilience related to nutritional, social and lifestyle factors in children prenatally exposed to alcohol                                                                                               | Alcoholism: Clinical and Experimental Research               | Chambers, CD. & Coles, CD      | + | + | * | - |  |  | 1 |  |   | 1 | Ineligible |

|     |      |                                                                                                                                                                                                              |                                                   |                                   |   |   |   |   |  |  |   |  |   |            |
|-----|------|--------------------------------------------------------------------------------------------------------------------------------------------------------------------------------------------------------------|---------------------------------------------------|-----------------------------------|---|---|---|---|--|--|---|--|---|------------|
| 359 | 2016 | Protein intake, breastfeeding frequency and breastfeeding duration affect BMI from infancy to mid-childhood                                                                                                  | FASEB Journal                                     | Wright, M.                        | + | + | + | - |  |  | 1 |  | 1 | Ineligible |
| 360 | 2016 | Can vaginal delivery reduce the intergenerational transmission of overweight and obesity? findings from the boston birth cohort                                                                              | Circulation                                       | Mueller, NT.                      | + | + | + | - |  |  | 1 |  | 1 | Ineligible |
| 361 | 2016 | Differential eating behavior patterns in children with prenatal alcohol exposure are related to postnatal growth trajectories                                                                                | Alcoholism: Clinical and Experimental Research    | Chambers, CD.                     | + | + | + | - |  |  | 1 |  | 1 | Ineligible |
| 362 | 2016 | Effects of family disposable income on development of height and BMI from birth up to eight years of age                                                                                                     | Obesity Facts                                     | Bramsved, R.                      | + | + | + | - |  |  | 1 |  | 1 | Ineligible |
| 363 | 2016 | Association of maternal menarcheal age with anthropometric dimensions and blood pressure in children from Greater Bilbao                                                                                     | Annals of Human Biology                           | Jelenkovic, A.                    | * | + | + | - |  |  | 1 |  | 1 | Ineligible |
| 364 | 2016 | Childhood obesity and the income gradient: evidence from Australia                                                                                                                                           | Applied Economics                                 | Nghiem, S. & Khanam, R.           | + | - | + | + |  |  | 1 |  | 1 | Ineligible |
| 365 | 2016 | Skipping breakfast in early childhood and its associations with maternal and child BMI: a study of 2-5-year-old Australian children                                                                          | European Journal of Clinical Nutrition            | Alsharairi, NA. & Somerset, SM.   | + | * | + | - |  |  | 1 |  | 1 | Ineligible |
| 366 | 2016 | Inappropriate Feeding Behavior: One of the Important Causes of Malnutrition in 6-to 36-Month-Old Children in Myanmar                                                                                         | American Journal of Tropical Medicine and Hygiene | Zhao, A.                          | * | + | + | - |  |  | 1 |  | 1 | Ineligible |
| 367 | 2016 | FACTORS ASSOCIATED WITH CHILDREN'S HEIGHT AND BODY MASS INDEX IN LITHUANIA, 1990-2008                                                                                                                        | Journal of Biosocial Science                      | Suchomlino v, A. & Tutkuvienė, J. | + | + | + | - |  |  | 1 |  | 1 | Ineligible |
| 368 | 2016 | Impact of Food Assistance Programs on Obesity in Mothers and Children: A Prospective Cohort Study in Peru                                                                                                    | American Journal of Public Health                 | Carrillo-Larco, RM.               | * | - | + | * |  |  | 1 |  | 1 | Ineligible |
| 369 | 2016 | Early Childhood Disadvantage for Sons of Mexican Immigrants: Body Mass Index Across Ages 2-5                                                                                                                 | American Journal of Health Promotion              | Lawrence, E.                      | + | - | + | * |  |  | 1 |  | 1 | Ineligible |
| 370 | 2016 | Early life factors predicting change in childhood body mass index                                                                                                                                            | Obesity Facts                                     | Kerr, JA.                         | + | * | + | - |  |  | 1 |  | 1 | Ineligible |
| 371 | 2017 | Disparities in children's vocabulary and height in relation to household wealth and parental schooling: A longitudinal study in four low-and middle-income countries. SSM Popul Health. 2017 Dec; 3: 767-786 | -                                                 | Reynolds, SA.                     | + | + | + | - |  |  | 1 |  | 1 | Ineligible |
| 372 | 2017 | Growth of HIV-exposed uninfected, compared with HIV-unexposed, Zambian children: a longitudinal analysis from infancy to school age.                                                                         | BMC pediatrics                                    | Rosala-Hallas, A.                 | + | + | + | - |  |  | 1 |  | 1 | Ineligible |
| 373 | 2017 | Childhood obesity and maternal education in Ireland.                                                                                                                                                         | Economics and human biology                       | Madden, D.                        | + | - | + | + |  |  | 1 |  | 1 | Ineligible |
| 374 | 2017 | Catch-up growth in stunted children: Definitions and predictors.                                                                                                                                             | PLOS One                                          | Desmond, Ch. & Casale, D.         | + | - | + | + |  |  | 1 |  | 1 | Ineligible |
| 375 | 2017 | The impact of maternal employment on children's adiposity: Evidence from China's labor policy reform.                                                                                                        | Health economics                                  | Jo, Y. & Wang, Q.                 | * | - | + | + |  |  | 1 |  | 1 | Ineligible |
| 376 | 2017 | Does vaginal delivery mitigate or strengthen the intergenerational association of overweight and obesity? Findings from the Boston Birth Cohort.                                                             | International journal of obesity (2005)           | Mueller, NT.                      | + | * | + | - |  |  | 1 |  | 1 | Ineligible |

|     |      |                                                                                                                                                                                            |                                                                   |                              |   |   |   |   |   |   |   |   |  |   |                      |
|-----|------|--------------------------------------------------------------------------------------------------------------------------------------------------------------------------------------------|-------------------------------------------------------------------|------------------------------|---|---|---|---|---|---|---|---|--|---|----------------------|
| 377 | 2017 | Status of High Body Weight Among Nurse-Family Partnership Children.                                                                                                                        | MCN. The American journal of maternal child nursing               | Thorland, W.                 | + | + | + | - |   |   | 1 |   |  | 1 | Ineligible           |
| 378 | 2017 | The associations of large-for-gestational-age and infant feeding practices with children's body mass index z-score trajectories: the Early Childhood Longitudinal Study, Birth Cohort.     | Clinical obesity                                                  | Salahuddin, M.               | + | + | + | - |   |   | 1 |   |  | 1 | Ineligible           |
| 379 | 2017 | Association between Sleep and Body Weight: A Panel Data Model Based on a Retrospective Longitudinal Cohort of Chinese Infants.                                                             | International journal of environmental research and public health | Sha, T.                      | + | + | + | * | 1 |   |   | 1 |  |   | Continuous Education |
| 380 | 2017 | Longitudinal associations between maternal feeding and overweight in low-income toddlers.                                                                                                  | Appetite                                                          | Lumeng, J.C.                 | + | + | + | - |   |   | 1 |   |  | 1 | Ineligible           |
| 381 | 2017 | Childhood stunting in relation to the pre- and postnatal environment during the first 2 years of life: The MAL-ED longitudinal birth cohort study.                                         | PLoS medicine                                                     | MAL-ED Network Investigators | + | + | + | - |   |   | 1 |   |  | 1 | Ineligible           |
| 382 | 2017 | Acculturation and weight change in Asian-American children: Evidence from the ECLS-K:2011.                                                                                                 | Preventive medicine                                               | Diep, C.S.                   | * | - | + | + |   |   | 1 |   |  | 1 | Ineligible           |
| 383 | 2017 | Access to Obstetric Care and Children's Health, Growth and Cognitive Development in Vietnam: Evidence from Young Lives                                                                     | Maternal and Child Health Journal                                 | Lavin, T.                    | + | + | + | - |   |   | 1 |   |  | 1 | Ineligible           |
| 384 | 2017 | Increase in weight in low birth weight and very low birth weight infants fed fortified breast milk versus formula milk: A retrospective cohort study                                       | Nutrients                                                         | Lok, KYW.                    | + | + | + | - |   |   | 1 |   |  | 1 | Ineligible           |
| 385 | 2017 | Association between parental socio-demographic factors and declined linear growth of young children in Jakarta                                                                             | Medical Journal of Indonesia                                      | Gunardi, H.                  | + | + | - | + |   | 1 |   | 1 |  |   | Growth trajectory    |
| 386 | 2017 | The influence of breastfeeding duration and introduction of animal source foods, fruit juice and vegetables on the risk of weight gain in Thai children                                    | Sri Lanka Journal of Child Health                                 | Hong, S.A.                   | + | + | + | - |   |   | 1 | 1 |  |   | Ineligible           |
| 387 | 2017 | The Simultaneous Effects of Socioeconomic Disadvantage and Child Health on Children's Cognitive Development                                                                                | Demography                                                        | Lee, D. & Jackson, M.        | * | * | - | + |   |   | 1 |   |  | 1 | Ineligible           |
| 388 | 2017 | Evidence that children born at early term (37-38 6/7 weeks) are at increased risk for diabetes and obesity-related disorders                                                               | American Journal of Obstetrics and Gynecology                     | Paz Levy, D.                 | + | * | + | - |   |   | 1 |   |  | 1 | Ineligible           |
| 389 | 2017 | Studying Impact of Nutrition on Growth (SING): A prospective cohort for comparing the health outcomes of young children with the dietary quality score                                     | BMJ Open                                                          | Lee, A.                      | + | + | + | - |   |   | 1 |   |  | 1 | Ineligible           |
| 390 | 2017 | Children with access to improved sanitation but not improved water are at lower risk of stunting compared to children without access: a cohort study in Ethiopia, India, Peru, and Vietnam | BMC Public Health                                                 | Dearden, K.A.                | + | + | + | - |   |   | 1 |   |  | 1 | Ineligible           |
| 391 | 2017 | The relationship between family characteristics and height in Sardinia at the turn of the twentieth century                                                                                | History of the Family                                             | Mazzoni, S.                  | * | - | + | * |   |   | 1 |   |  | 1 | Ineligible           |
| 392 | 2017 | Childhood Health and Prenatal Exposure to Seasonal Food Scarcity in Ethiopia                                                                                                               | World Development                                                 | Miller, R.                   | + | + | + | - |   |   | 1 |   |  | 1 | Ineligible           |
| 393 | 2017 | Effects of socioeconomic position and social mobility on linear growth from early childhood until adolescence                                                                              | Revista Brasileira de Epidemiologia                               | Muraro, AP.                  | + | - | + | + |   |   | 1 |   |  | 1 | Ineligible           |
| 394 | 2017 | Aflatoxin exposure during the first 36 months of life was not associated with impaired growth in Nepalese children: An extension of the MAL-ED study                                       | PLOS One                                                          | Mitchell, NJ.                | + | + | + | - |   |   | 1 |   |  | 1 | Ineligible           |

|     |      |                                                                                                                                                       |                                                   |                |   |   |   |   |  |  |   |   |   |            |
|-----|------|-------------------------------------------------------------------------------------------------------------------------------------------------------|---------------------------------------------------|----------------|---|---|---|---|--|--|---|---|---|------------|
| 395 | 2017 | Prenatal care and child growth and schooling in four low- and medium-income countries                                                                 | PLOS One                                          | Liu, X.        | - | + | + | - |  |  | 1 |   | 1 | Ineligible |
| 396 | 2017 | Predicting Undernutrition at Age 2 Years with Early Attained Weight and Length Compared with Weight and Length Velocity                               | Journal of Pediatrics                             | Schwinger, C.  | + | + | + | - |  |  | 1 |   | 1 | Ineligible |
| 397 | 2017 | The impact of gestational endocrine disorders of breast milk fat characteristics and infant growth                                                    | FASEB Journal                                     | Ellsworth, L.  | + | + | + | - |  |  | 1 |   | 1 | Ineligible |
| 398 | 2017 | Associations of delivery mode and labor with measures of childhood adiposity: Findings from Project Viva                                              | FASEB Journal                                     | Mueller, NT.   | + | * | + | - |  |  | 1 |   | 1 | Ineligible |
| 399 | 2017 | Maternal generation and overweight and obesity in 2-11 year old children: Evidence from birth cohort of the longitudinal study of Australian children | Obesity Facts                                     | Zulfqar, T.    | * | * | + | - |  |  | 1 |   | 1 | Ineligible |
| 400 | 2017 | Impact of maternal sth infection on infant height and weight gains at 24 months of age                                                                | Tropical Medicine and International Health        | Gyorkos, TW.   | + | + | + | - |  |  | 1 | 1 |   | Ineligible |
| 401 | 2017 | Causal analysis of under-nutrition in jeju and melka belo districts of Oromia region of Ethiopia                                                      | Annals of Nutrition and Metabolism                | Asamo, FM.     | * | + | + | - |  |  | 1 |   | 1 | Ineligible |
| 402 | 2017 | The association between Helicobacter pylori and growth in children less than 18 months of age                                                         | Helicobacter                                      | Dror, G.       | + | + | + | - |  |  | 1 | 1 |   | Ineligible |
| 403 | 2017 | Prevalence of hospital malnutrition in children under five years of age in a hospital of reference                                                    | Annals of Nutrition and Metabolism                | Peralta M.     | * | + | + | - |  |  | 1 |   | 1 | Ineligible |
| 404 | 2017 | Neuropsychological outcomes in a two year african-based pediatric observational study                                                                 | Topics in Antiviral Medicine                      | Boivin, MJ.    | * | * | + | - |  |  | 1 |   | 1 | Ineligible |
| 405 | 2017 | Growth changes from infancy to childhood and glucose tolerance in late adolescence: Evidence from hong kong's "children of 1997" birth cohort         | Annals of Nutrition and Metabolism                | Cheng, TS.     | + | * | * | - |  |  | 1 |   | 1 | Ineligible |
| 406 | 2017 | Stunting in extreme nutritional vulnerability: Eastern of Democratic Republic of Congo crisis case                                                    | Tropical Medicine and International Health        | Bisimwa, B.    | + | + | + | - |  |  | 1 | 1 |   | Ineligible |
| 407 | 2017 | Early childhood stunting among HIV-exposed, uninfected infants in Kenya; the impact of maternal and infant diarrhea                                   | American Journal of Tropical Medicine and Hygiene | Deichsel, EL.  | + | + | + | - |  |  | 1 |   | 1 | Ineligible |
| 408 | 2017 | Early life factors and childhood habits influencing excess body weight in a Spanish multicultural cohort (calina cohort)                              | Annals of Nutrition and Metabolism                | Rodríguez, G.  | + | + | + | - |  |  | 1 |   | 1 | Ineligible |
| 409 | 2017 | Health-Related Parenting Among US Families and Young Children's Physical Health                                                                       | JOURNAL OF MARRIAGE AND FAMILY                    | Augustine, JM. | + | * | + | - |  |  | 1 |   | 1 | Ineligible |
| 410 | 2017 | Risk factors for childhood obesity: Do the birth weight, type of delivery, and mother's overweight have an implication on current weight status?      | WORLD JOURNAL OF PEDIATRICS                       | Vehapoglu, A.  | * | - | + | + |  |  | 1 |   | 1 | Ineligible |
| 411 | 2017 | Breastfeeding duration and its relation to weight gain, eating behaviours and positive maternal feeding practices in infancy                          | APPETITE                                          | Rogers, SL.    | + | + | + | - |  |  | 1 | 1 |   | Ineligible |
| 412 | 2017 | The Longitudinal Association Between Early Childhood Obesity and Fathers' Involvement in Caregiving and Decision-Making                               | OBESITY                                           | Wong, MS.      | + | + | + | - |  |  | 1 |   | 1 | Ineligible |
| 413 | 2017 | Maternal and infant factors had a significant impact on birthweight and longitudinal growth in a South African birth cohort                           | ACTA PAEDIATRICA                                  | Budree, S.     | + | + | + | - |  |  | 1 |   | 1 | Ineligible |
| 414 | 2017 | Intergrowth 21 st project: What is new for newborn anthropometric assessment?                                                                         | Annals of Nutrition and Metabolism                | Medina, M.     | * | + | + | - |  |  | 1 |   | 1 | Ineligible |

|     |      |                                                                                                                                                                          |                                                       |                            |   |   |   |   |   |  |   |   |   |                      |
|-----|------|--------------------------------------------------------------------------------------------------------------------------------------------------------------------------|-------------------------------------------------------|----------------------------|---|---|---|---|---|--|---|---|---|----------------------|
| 415 | 2017 | Becoming malnourished children, one year after nutrition education in kaya (burkina faso)                                                                                | Annals of Nutrition and Metabolism                    | Garanet, F.                | + | * | + | - |   |  | 1 |   | 1 | Ineligible           |
| 416 | 2018 | Growth patterns from birth to 24 months in Chinese children: a birth cohorts study across China.                                                                         | BMC pediatrics                                        | Ouyang, F.                 | + | + | + | - |   |  | 1 |   | 1 | Ineligible           |
| 417 | 2018 | Socioeconomic status, and health during childhood: A longitudinal examination of racial/ethnic differences in parental socioeconomic timing and child obesity risk       | Int J Environ Res Public Health                       | Race Jones, A. & Jones, A. | + | - | + | + |   |  | 1 |   | 1 | Ineligible           |
| 418 | 2018 | The Effect of Paternal Education on Child Health in South Africa: A Longitudinal Analysis                                                                                |                                                       | Pillay, SR.                | - | + | + | + |   |  | 1 |   | 1 | Ineligible           |
| 419 | 2018 | Micronutrient adequacy is poor, but not associated with stunting between 12-24 months of age: A cohort study findings from a slum area of Bangladesh.                    | PLOS One                                              | Sanin, KI.                 | + | + | + | + | 1 |  |   |   | 1 | Continuous Education |
| 420 | 2018 | Comparative Models of Biological and Social Pathways to Predict Child Growth through Age 2 Years from Birth Cohorts in Brazil, India, the Philippines, and South Africa. | The Journal of nutrition                              | Richter, LM.               | * | + | + | - |   |  | 1 |   | 1 | Ineligible           |
| 421 | 2018 | Prospective associations between social vulnerabilities and children's weight status. Results from the IDEFICS study.                                                    | International journal of obesity (2005)               | Iguacel, I.                | * | - | + | + |   |  | 1 |   | 1 | Ineligible           |
| 422 | 2018 | Enteroggregative Escherichia coli Subclinical Infection and Coinfections and Impaired Child Growth in the MAL-ED Cohort Study.                                           | Journal of pediatric gastroenterology and nutrition   | Lima AAM.                  | + | + | + | - |   |  | 1 | 1 |   | Ineligible           |
| 423 | 2018 | Role of maternal preconception nutrition on offspring growth and risk of stunting across the first 1000 days in Vietnam: A prospective cohort study.                     | PLOS One                                              | Young, MF.                 | + | + | + | + | 1 |  |   |   | 1 | Ineligible           |
| 424 | 2018 | Prenatal risk factors influencing childhood BMI and overweight independent of birth weight and infancy BMI: a path analysis within the Danish National Birth Cohort.     | International journal of obesity (2005)               | Morgen, CS.                | + | - | + | + |   |  | 1 |   | 1 | Ineligible           |
| 425 | 2018 | Physical and psychosocial development of Mapuche and nonindigenous Chilean toddlers: A modest role of ethnicity.                                                         | Development and psychopathology                       | Navarrete, MA.             | + | - | + | + |   |  | 1 |   | 1 | Ineligible           |
| 426 | 2018 | [Early childhood development and risk factors in rural China: a cohort study].                                                                                           | Zhonghua er ke za zhi = Chinese journal of pediatrics | Cui, Y.                    | + | + | - | * |   |  | 1 |   | 1 | Ineligible           |
| 427 | 2018 | Association of maternal depression with dietary intake, growth, and development of preterm infants: a cohort study in Beijing, China.                                    | Frontiers of medicine                                 | Wang, H.                   | + | + | + | - |   |  | 1 |   | 1 | Ineligible           |
| 428 | 2018 | Infectious Morbidity, Mortality and Nutrition in HIV-exposed, Uninfected, Formula-fed Infants: Results From the HPTN 040/PACTG 1043 Trial.                               | The Pediatric infectious disease journal              | Yeganeh, N.                | * | + | + | - |   |  | 1 |   | 1 | Ineligible           |
| 429 | 2018 | Racial and Ethnic Disparities in Early Childhood Obesity.                                                                                                                | Pediatrics                                            | Isong, IA.                 | + | - | + | + |   |  | 1 |   | 1 | Ineligible           |
| 430 | 2018 | Does Village Chicken-Keeping Contribute to Young Children's Diets and Growth? A Longitudinal Observational Study in Rural Tanzania.                                      | Nutrients                                             | de Bruyn, J.               | + | - | + | * |   |  | 1 | 1 |   | Ineligible           |
| 431 | 2018 | The role of fathers in overweight prevention: an analysis of a Caribbean cohort.                                                                                         | Global health, epidemiology and genomics              | Smith, JA.                 | - | + | + | + | 1 |  |   |   | 1 | Ineligible           |
| 432 | 2018 | Picky eating, pressuring feeding, and growth in toddlers.                                                                                                                | Appetite                                              | Lumeng, JC.                | + | + | + | - |   |  | 1 |   | 1 | Ineligible           |
| 433 | 2018 | Association of Elective and Emergency Cesarean Delivery With Early Childhood Overweight at 12 Months of Age.                                                             | JAMA network open                                     | Cai, M.                    | + | + | + | - |   |  | 1 |   | 1 | Ineligible           |

|     |      |                                                                                                                                                                                             |                                                                   |                    |   |   |   |   |   |   |   |   |   |   |                      |
|-----|------|---------------------------------------------------------------------------------------------------------------------------------------------------------------------------------------------|-------------------------------------------------------------------|--------------------|---|---|---|---|---|---|---|---|---|---|----------------------|
| 434 | 2018 | Maternal preconception weight trajectories, pregnancy complications and offspring's childhood physical and cognitive development.                                                           | Journal of developmental origins of health and disease            | Adane, AA.         | + | * | - | * |   |   | 1 |   |   | 1 | Ineligible           |
| 435 | 2018 | Early maternal perceived stress and children's BMI: longitudinal impact and influencing factors.                                                                                            | BMC public health                                                 | Leppert, B.        | + | + | + | - |   |   | 1 |   |   | 1 | Ineligible           |
| 436 | 2018 | Causal Effect of Parental Schooling on Early Childhood Undernutrition: Quasi-Experimental Evidence From Zimbabwe.                                                                           | American journal of epidemiology                                  | De Neve, JW.       | - | + | + | + |   |   | 1 |   |   | 1 | Ineligible           |
| 437 | 2018 | Body Mass Index Changes in Early Childhood.                                                                                                                                                 | The Journal of pediatrics                                         | Jabakhanji, SB.    | + | + | + | - |   |   | 1 |   |   | 1 | Ineligible           |
| 438 | 2018 | Somatic growth from birth to 6 months in low birth weight, in Bukavu, South Kivu, Democratic Republic of the Congo.                                                                         | Revue d'epidemiologie et de sante publique                        | Mbusa-Kambale, R.  | + | + | + | - |   |   | 1 |   |   | 1 | Ineligible           |
| 439 | 2018 | Parental Socioeconomic Instability and Child Obesity.                                                                                                                                       | Biodemography and social biology                                  | Jones, A.          | + | - | + | + |   |   | 1 |   |   | 1 | Ineligible           |
| 440 | 2018 | Fetal vitamin D concentration and growth, adiposity and neurodevelopment during infancy.                                                                                                    | European journal of clinical nutrition                            | Wang, H.           | + | + | + | - |   |   | 1 |   |   | 1 | Ineligible           |
| 441 | 2018 | Prenatal exposure to preeclampsia is associated with accelerated height gain in early childhood.                                                                                            | PLOS One                                                          | Gunnarsdot tir, J. | + | + | + | - |   |   | 1 |   |   | 1 | Ineligible           |
| 442 | 2018 | The Associations of Breast Feeding with Infant Growth and Body Mass Index to 16 years: 'Children of 1997'.                                                                                  | Paediatric and perinatal epidemiology                             | Cheng, TS          | + | + | + | - |   |   | 1 |   | 1 |   | Ineligible           |
| 443 | 2018 | Duration of Breastfeeding, but Not Timing of Solid Food, Reduces the Risk of Overweight and Obesity in Children Aged 24 to 36 Months: Findings from an Australian Cohort Study.             | International journal of environmental research and public health | Bell, S.           | + | - | + | + |   |   | 1 |   |   | 1 | Ineligible           |
| 444 | 2018 | Estimating the pathways through which maternal education affects stunting: evidence from an urban cohort in South Africa.                                                                   | Public health nutrition                                           | Casale, D.         | + | + | + | + | 1 |   |   |   |   | 1 | Continuous Education |
| 445 | 2018 | Social vulnerabilities as determinants of overweight in 2-, 4- and 6-year-old Spanish children.                                                                                             | European journal of public health                                 | Iguacel, I.        | + | - | + | + |   |   | 1 |   |   | 1 | Ineligible           |
| 446 | 2018 | Socioeconomic differences in childhood BMI trajectories in Belarus.                                                                                                                         | International journal of obesity (2005)                           | Patel, R.          | - | + | + | + |   | 1 |   | 1 |   |   | Ineligible           |
| 447 | 2018 | Parental education and family income affect birthweight, early longitudinal growth and body mass index development differently.                                                             | Acta paediatrica (Oslo, Norway : 1992)                            | Bramsved, R.       | + | + | + | - |   |   | 1 |   |   | 1 | Ineligible           |
| 448 | 2018 | Association of maternal gestational weight gain with their offspring's anthropometric outcomes at late infancy and 6 years old: mediating roles of birth weight and breastfeeding duration. | International journal of obesity (2005)                           | Liu, JX.           | + | + | + | - |   |   | 1 |   |   | 1 | Ineligible           |
| 449 | 2018 | Sociodemographic factors and overweight in children participating in a government program for fortified milk distribution                                                                   | Journal of Human Growth and Development                           | Escaldelai, FMD.   | + | + | + | - |   |   | 1 | 1 |   |   | Ineligible           |
| 450 | 2018 | Exclusive breastfeeding and partial breastfeeding reduce the risk of overweight in childhood: A nationwide longitudinal study in Korea                                                      | Obesity Research and Clinical Practice                            | Park, SJ.          | + | + | + | - |   |   | 1 |   |   | 1 | Ineligible           |
| 451 | 2018 | Regional variation in weight-for-height z-scores and surface area/body mass ratio of Chilean children from birth to 3 years of age                                                          | American Journal of Physical Anthropology                         | Retamal, R.        | + | + | + | - |   |   | 1 |   |   | 1 | Ineligible           |



|     |      |                                                                                                                                                                                          |                                             |                       |   |   |   |   |   |   |   |   |  |   |                      |
|-----|------|------------------------------------------------------------------------------------------------------------------------------------------------------------------------------------------|---------------------------------------------|-----------------------|---|---|---|---|---|---|---|---|--|---|----------------------|
| 452 | 2018 | Adolescent mothers' anthropometrics and grandmothers' schooling predict infant anthropometrics in Ethiopia, India, Peru, and Vietnam                                                     | Annals of the New York Academy of Sciences  | Schott, W.            | + | - | + | * |   |   | 1 |   |  | 1 | Ineligible           |
| 453 | 2018 | Growth and biochemical markers of preterm newborns up to six months of corrected age                                                                                                     | Journal of Human Growth and Development     | Barreto, GMS.         | + | + | + | - |   |   | 1 |   |  | 1 | Ineligible           |
| 454 | 2018 | FRAGILE ENVIRONMENT, SEASONALITY AND MATERNAL AND CHILDHOOD UNDERNUTRITION IN BANGLADESH                                                                                                 | Journal of Biosocial Science                | Mohsena, M.           | * | * | + | - |   |   | 1 |   |  | 1 | Ineligible           |
| 455 | 2018 | The impact of maternal mental health shocks on child health: Estimates from fixed-effects instrumental variables models for two cohorts of Australian children                           | American Journal of Health Economics        | Le, HT. & Nguyen, HT. | + | + | + | - |   |   | 1 |   |  | 1 | Ineligible           |
| 456 | 2018 | Body composition during early infancy and developmental progression from 1 to 5 years of age: the Infant Anthropometry and Body Composition (iABC) cohort study among Ethiopian children | British Journal of Nutrition                | Abera, M.             | + | * | - | - |   |   | 1 | 1 |  |   | Ineligible           |
| 457 | 2018 | Family size effects on childhood obesity: Evidence on the quantity-quality trade-off using the NLSY                                                                                      | Economics & Human Biology                   | Dasgupta, K.          | * | * | + | - |   |   | 1 |   |  | 1 | Ineligible           |
| 458 | 2018 | The Influence of Ethnicity on Exclusively Breast-Fed Infants' Anthropometry in a Multiethnic Asian Population                                                                            | Annals of the Academy of Medicine Singapore | Huang, JG.            | + | + | + | - |   |   | 1 |   |  | 1 | Ineligible           |
| 459 | 2018 | Prenatal stress exposure and early childhood BMI: Exploring associations in a New Zealand context                                                                                        | American Journal of Human Biology           | Farewell, ChV.        | + | + | + | + | 1 |   |   | 1 |  |   | Continuous Education |
| 460 | 2018 | The Associations of Breast Feeding with Infant Growth and Body Mass Index to 16years: ``Children of 1997'                                                                                | Paediatric and Perinatal Epidemiology       | Cheng, TS.            | + | + | + | - |   |   | 1 |   |  | 1 | Ineligible           |
| 461 | 2018 | Relationship between socioeconomic status and weight gain during infancy: The BeeBOFT study                                                                                              | PLOS ONE                                    | Wang, L.              | - | + | + | + |   | 1 |   |   |  | 1 | Ineligible           |
| 462 | 2018 | Parents with overweight children two and five years of age did not perceive them as weighing too much                                                                                    | Acta Paediatrica                            | Berggren, S.          | + | + | + | - |   |   | 1 |   |  | 1 | Ineligible           |
| 463 | 2018 | Household Food Insecurity and Early Childhood Health and Cognitive Development Among Children of Immigrants                                                                              | Journal of Family Issues                    | Huang, Y.             | + | * | - | - |   |   | 1 |   |  | 1 | Ineligible           |
| 464 | 2018 | Associations among High-Quality Protein and Energy Intake, Serum Transthyretin, Serum Amino Acids and Linear Growth of Children in Ethiopia                                              | Nutrients                                   | Tessema, M.           | - | + | + | + |   | 1 |   |   |  | 1 | Ineligible           |
| 465 | 2019 | Associations of less healthy snack food consumption with infantweight-for-length Z-score trajectories: Findings from the nurture cohort study                                            | Nutrients                                   | Moore, AM.            | + | + | + | - |   |   | 1 |   |  | 1 | Ineligible           |
| 466 | 2019 | Relative importance of prenatal and postnatal determinants of stunting: data mining approaches to the MINIMat cohort, Bangladesh.                                                        | BMJ open                                    | Svefors, P.           | - | + | + | + |   | 1 |   |   |  | 1 | Ineligible           |
| 467 | 2019 | Western Australian pregnancy cohort (Raine) Study: Generation 1.                                                                                                                         | BMJ open                                    | Dontje, ML.           | + | * | - | - |   |   | 1 |   |  | 1 | Ineligible           |
| 468 | 2019 | Infant nutrition and growth: trends and inequalities in four population-based birth cohorts in Pelotas, Brazil, 1982-2015.                                                               | International journal of epidemiology       | Gonçalves, H.         | + | + | + | - |   |   | 1 |   |  | 1 | Ineligible           |
| 469 | 2019 | The relationship between responsive caregiving and child outcomes: evidence from direct observations of mother-child dyads in Pakistan.                                                  | BMC public health                           | Scherer, E.           | + | * | + | - |   |   | 1 |   |  | 1 | Ineligible           |
| 470 | 2019 | Sex effect on growth faltering in an indigenous ethnic minority population of infants in Israel.                                                                                         | Public health nutrition                     | Bilenko, N.           | + | + | + | - |   |   | 1 |   |  | 1 | Ineligible           |
| 471 | 2019 | The role of offspring's birthweight on the association between pre-pregnancy obesity and offspring's childhood anthropometrics: a mediation analysis.                                    | Journal of developmental                    | Adane, AA.            | + | - | + | * |   |   | 1 |   |  | 1 | Ineligible           |

|     |      |                                                                                                                                                                                                                                             |                                                                         |                              |   |   |   |   |   |  |   |   |  |  |   |  |  |             |
|-----|------|---------------------------------------------------------------------------------------------------------------------------------------------------------------------------------------------------------------------------------------------|-------------------------------------------------------------------------|------------------------------|---|---|---|---|---|--|---|---|--|--|---|--|--|-------------|
|     |      |                                                                                                                                                                                                                                             | origins of health and disease                                           |                              |   |   |   |   |   |  |   |   |  |  |   |  |  |             |
| 472 | 2019 | Long work hours of mothers and fathers are linked to increased risk for overweight and obesity among preschool children: longitudinal evidence from Germany.                                                                                | Journal of epidemiology and community health                            | Li, J.                       | + | - | + | + |   |  | 1 |   |  |  | 1 |  |  | Ineligible  |
| 473 | 2019 | Analysing child linear growth trajectories among under-5 children in two Nairobi informal settlements.                                                                                                                                      | Public health nutrition                                                 | Faye, ChM.                   | + | - | + | * |   |  | 1 |   |  |  | 1 |  |  | Ineligible  |
| 474 | 2019 | The double burden of malnutrition among youth: Trajectories and inequalities in four emerging economies.                                                                                                                                    | Economics and human biology                                             | Schott, W.                   | * | - | + | + |   |  | 1 |   |  |  | 1 |  |  | Ineligible  |
| 475 | 2019 | Adolescent pregnancy and linear growth of infants: a birth cohort study in rural Ethiopia.                                                                                                                                                  | Nutrition journal                                                       | Workicho, A.                 | + | + | + | + | 1 |  |   | 1 |  |  |   |  |  | Height gain |
| 476 | 2019 | BMI trajectories and risk factors among 2-11-year-old children by their immigrant status: evidence from the Longitudinal Study of Australian Children.                                                                                      | BMJ open                                                                | Zulfikar, T.                 | + | + | + | - |   |  | 1 |   |  |  | 1 |  |  | Ineligible  |
| 477 | 2019 | Antibiotic use in early childhood and risk of obesity: longitudinal analysis of a national cohort.                                                                                                                                          | World journal of pediatrics                                             | Kelly, D.                    | + | - | + | + |   |  | 1 |   |  |  | 1 |  |  | Ineligible  |
| 478 | 2019 | The association between antibiotics in the first year of life and child growth trajectory.                                                                                                                                                  | BMC pediatrics                                                          | Dawson-Hahn, EE. & Rhee, KE. | + | - | + | - |   |  | 1 |   |  |  | 1 |  |  | Ineligible  |
| 479 | 2019 | Factors associated with the evolution of weight of children in a supplementary feeding program.                                                                                                                                             | Revista brasileira de epidemiologia = Brazilian journal of epidemiology | Ortelan, N.                  | + | - | + | + |   |  | 1 |   |  |  | 1 |  |  | Ineligible  |
| 480 | 2019 | Undernutrition of HEU infants in their first 1000 days of life: A case in the urban-low resource setting of Mukuru Slum, Nairobi, Kenya.                                                                                                    | Heliyon                                                                 | Wambura, JN. & Marnane, B.   | + | + | + | - |   |  | 1 |   |  |  | 1 |  |  | Ineligible  |
| 481 | 2019 | Low head circumference during early childhood and its predictors in a semi-urban settlement of Vellore, Southern India.                                                                                                                     | BMC pediatrics                                                          | Sindhu KN.                   | + | + | - | + |   |  | 1 |   |  |  | 1 |  |  | Ineligible  |
| 482 | 2019 | Provision of low-iron micronutrient powders on alternate days is associated with lower prevalence of anaemia, stunting, and improved motor milestone acquisition in the first year of life: A retrospective cohort study in rural Ethiopia. | Maternal & child nutrition                                              | Geletu, A.                   | + | + | + | - |   |  | 1 |   |  |  | 1 |  |  | Ineligible  |
| 483 | 2019 | Effects of infant feeding practices and maternal characteristics on early childhood obesity.                                                                                                                                                | Archivos argentinos de pediatria                                        | Ardic, C.                    | + | - | + | + |   |  | 1 |   |  |  | 1 |  |  | Ineligible  |
| 484 | 2019 | Factors associated with catch-up growth in early infancy in rural Pakistan: A longitudinal analysis of the women's work and nutrition study.                                                                                                | Maternal & child nutrition                                              | Pradeilles R.                | + | + | + | + | 1 |  |   | 1 |  |  |   |  |  | Height gain |
| 485 | 2019 | Stunting trajectories from post-infancy to adolescence in Ethiopia, India, Peru, and Vietnam                                                                                                                                                | Maternal and Child Nutrition                                            |                              | + | + | + | - |   |  | 1 |   |  |  | 1 |  |  | Ineligible  |
| 486 | 2019 | High Maternal Circulating Cotinine during Pregnancy is Associated with Persistently Shorter Stature from Birth to Five Years in an Asian Cohort                                                                                             | Nicotine and Tobacco Research                                           | Ng, S.                       | + | + | + | - |   |  | 1 |   |  |  | 1 |  |  | Ineligible  |
| 487 | 2019 | Haemophilus influenzae type b vaccination and anthropometric, cognitive, and schooling outcomes among Indian children                                                                                                                       | Annals of the New York Academy of Sciences                              | Nandi A.                     | + | + | + | - |   |  | 1 |   |  |  | 1 |  |  | Ineligible  |
| 488 | 2019 | Correction: Examining the relationship between socio-economic status, WASH practices and wasting (PLOS One (2017) 12: 3 (e0172134) DOI: 10.1371/journal.pone.0172134)                                                                       | PLOS One                                                                | Raihan MJ.                   | - | + | + | - |   |  | 1 |   |  |  | 1 |  |  | Ineligible  |

|     |      |                                                                                                                                                                                        |                                                     |                         |   |   |   |   |  |  |   |   |   |                   |
|-----|------|----------------------------------------------------------------------------------------------------------------------------------------------------------------------------------------|-----------------------------------------------------|-------------------------|---|---|---|---|--|--|---|---|---|-------------------|
| 489 | 2019 | Childhood Obesity Differences in Single-Father and Single-Mother Families                                                                                                              | Sociological Focus                                  | Noonan, M. & Turchi, J. | * | - | + | * |  |  | 1 |   | 1 | Ineligible        |
| 490 | 2019 | Lifetime economic impact of the burden of childhood stunting attributable to maternal psychosocial risk factors in 137 low/middle-income countries                                     | BMJ Global Health                                   | Smith Fawzi, MC.        | - | * | + | + |  |  | 1 |   | 1 | Ineligible        |
| 491 | 2019 | The relationship between wasting and stunting: A retrospective cohort analysis of longitudinal data in Gambian children from 1976 to 2016                                              | American Journal of Clinical Nutrition              | Schoenbuehner, SM.      | + | + | + | - |  |  | 1 |   | 1 | Ineligible        |
| 492 | 2019 | Postnatal depression and infant growth in an urban area of Bangladesh                                                                                                                  | Midwifery                                           | Sharmin, KN.            | + | * | + | - |  |  | 1 |   | 1 | Ineligible        |
| 493 | 2019 | Labor migration in Indonesia and the health of children left behind                                                                                                                    | IZA Journal of Development and Migration            | Ng, J.                  | - | * | + | - |  |  | 1 |   | 1 | Ineligible        |
| 494 | 2019 | Malnutrition in children of northern Mozambique: Only a small picture of a global reality!                                                                                             | European Journal of Pediatrics                      | Santos, JC.             | * | + | + | - |  |  | 1 |   | 1 | Ineligible        |
| 495 | 2019 | Growth in children conceived by assisted reproductive technologies: The Norwegian Mother and Child Cohort Study                                                                        | Norsk Epidemiologi                                  | Magnus, MC.             | + | + | + | - |  |  | 1 |   | 1 | Ineligible        |
| 496 | 2019 | Validity of LATCH Score in predicting exclusive breast feeding and weight velocity at 6 weeks in healthy term Indian infants                                                           | Journal of Pediatric Gastroenterology and Nutrition | Shah, MH.               | + | + | + | - |  |  | 1 |   | 1 | Ineligible        |
| 497 | 2019 | Early life exposure to cigarettes is associated with adverse long-term health outcomes in a large, multicentre cohort                                                                  | Journal of Cystic Fibrosis                          | Rosenfeld, M..          | + | * | + | - |  |  | 1 |   | 1 | Ineligible        |
| 498 | 2019 | DNA methylation biomarkers of early life exposures and subsequent obesity: Findings from the Newcastle Thousand Families Study and the Avon Longitudinal Study of Parents and Children | Mutagenesis                                         | Robinson, N.            | + | + | + | - |  |  | 1 |   | 1 | Ineligible        |
| 499 | 2019 | The influence of age-appropriate feeding practices on the growth of Cambodian children: A longitudinal study                                                                           | Annals of Nutrition and Metabolism                  | Hondru, G.              | + | + | + | - |  |  | 1 |   | 1 | Ineligible        |
| 500 | 2019 | Prevalence of stunting among Malaysian infants aged 6 months and its associated factors                                                                                                | Annals of Nutrition and Metabolism                  | Shazali, FH.            | + | + | + | - |  |  | 1 | 1 |   | Insufficient data |
| 501 | 2019 | Comparative Study of Growth and Development in Children with Cleft Lip and Palate Versus Children without Cleft                                                                        | Journal of Oral and Maxillofacial Surgery           | Cordero, E.             | + | + | + | - |  |  | 1 |   | 1 | Ineligible        |
| 502 | 2019 | Small intestine bacterial overgrowth is associated with linear growth delay in a longitudinal analysis of Bangladeshi children                                                         | American Journal of Tropical Medicine and Hygiene   | Donowitz, J.            | + | + | + | - |  |  | 1 |   | 1 | Ineligible        |
| 503 | 2019 | The relationship between socioeconomic status and obesity in Korean children: Analysis from the Korean national survey (2007-2015)                                                     | Journal of Pediatric Gastroenterology and Nutrition | Lee, HJ. & Lee, JH.     | * | - | + | + |  |  | 1 |   | 1 | Ineligible        |
| 504 | 2019 | Associations of growth from birth to puberty with glycemic indicators at similar to 17.5years: Evidence from Hong Kong's "Children of 1997" birth cohort                               | PEDIATRIC DIABETES                                  | Cheng, TS.              | + | + | + | - |  |  | 1 | 1 |   | Ineligible        |
| 505 | 2019 | Infant nutrition and growth: trends and inequalities in four population-based birth cohorts in Pelotas, Brazil, 1982-2015                                                              | International Journal of Epidemiology               | Gonçalves H.            | + | + | + | - |  |  | 1 |   | 1 | Ineligible        |
| 506 | 2019 | Mother and Infant Predictors of Rapid Infant Weight Gain                                                                                                                               | Clinical Pediatrics                                 | Pesch, MH.              | + | + | + | - |  |  | 1 |   | 1 | Ineligible        |
| 507 | 2019 | Factors associated with recovery from stunting among under-five children in two Nairobi informal settlements                                                                           | PLOS One                                            | Faye, ChM.              | + | - | + | * |  |  | 1 |   | 1 | Ineligible        |

|     |      |                                                                                                                                                                           |                                                                   |                                  |   |   |   |   |  |   |   |   |  |   |            |
|-----|------|---------------------------------------------------------------------------------------------------------------------------------------------------------------------------|-------------------------------------------------------------------|----------------------------------|---|---|---|---|--|---|---|---|--|---|------------|
| 508 | 2020 | DIRECT AND INDIRECT CAUSES OF STUNTING AT FIVE SUB-DISTRICT IN CENTRAL BOGOR DISTRICT, BOGOR CITY (A QUALITATIVE STUDY OF CHILD DEVELOPMENT COHORT, 2019)                 | Buletin Penelitian Sistem Kesehatan                               | Rosha, BCh.                      | + | + | + | - |  |   | 1 |   |  | 1 | Ineligible |
| 509 | 2020 | Pathways to inflammation in adolescence through early adversity, childhood depressive symptoms, and body mass index: A prospective longitudinal study of Chilean infants. | Brain, behavior, and immunity                                     | Reid, BM.                        | + | * | * | - |  |   | 1 |   |  | 1 | Ineligible |
| 510 | 2020 | Are Household Expenditures on Food Groups Associated with Children's Future Heights in Ethiopia, India, Peru, and Vietnam?                                                | International journal of environmental research and public health | Weingarten, SE.                  | + | - | + | * |  |   | 1 |   |  | 1 | Ineligible |
| 511 | 2020 | BMI mobility and obesity transitions among children in Ireland.                                                                                                           | Economics and human biology                                       | Madden, D.                       | + | - | + | + |  |   | 1 |   |  | 1 | Ineligible |
| 512 | 2020 | Prenatal anxiety, breastfeeding and child growth and puberty: linking evolutionary models with human cohort studies.                                                      | Annals of human biology                                           | English, S.                      | + | * | + | - |  |   | 1 |   |  | 1 | Ineligible |
| 513 | 2020 | Baseline Characteristics of Study Participants in the Early Life Interventions for Childhood Growth and Development in Tanzania (ELICIT) Trial.                           | The American journal of tropical medicine and hygiene             | Parpia TC.                       | - | + | + | + |  | 1 |   |   |  | 1 | Ineligible |
| 514 | 2020 | [A new examination of the determinants of weight in early childhood].                                                                                                     | Revista chilena de pediatria                                      | Salinas, V. & Goldsmith Weil, J. | - | + | + | + |  |   | 1 |   |  | 1 | Ineligible |
| 515 | 2020 | Factors associated with early childhood stunted growth in a 2012-2015 birth cohort monitored in the rural Msambweni area of coastal Kenya: a cross-sectional study.       | BMC pediatrics                                                    | Martin, Sh.                      | + | + | + | - |  |   | 1 |   |  | 1 | Ineligible |
| 516 | 2020 | [The LIFE Child study: A cohort study investigating Child Development in changing environmental conditions].                                                              | Zeitschrift fur Psychosomatische Medizin und Psychotherapie       | Poulain, T.                      | + | * | * | - |  |   | 1 |   |  | 1 | Ineligible |
| 517 | 2020 | Prenatal exposure to traffic and ambient air pollution and infant weight and adiposity: The Healthy Start study.                                                          | Environmental research                                            | Starling, AnP.                   | + | + | - | + |  |   | 1 |   |  | 1 | Ineligible |
| 518 | 2020 | Associations between growth from birth to 18 years, intelligence, and schooling in a Brazilian cohort.                                                                    | The American journal of clinical nutrition                        | Baptista M.                      | + | + | + | - |  |   | 1 |   |  | 1 | Ineligible |
| 519 | 2020 | Factors associated with head circumference and indices of cognitive development in early childhood.                                                                       | BMJ global health                                                 | Nicolaou, L.                     | + | + | - | - |  |   | 1 |   |  | 1 | Ineligible |
| 520 | 2020 | Maternal nutritional status mediates the linkage between household food insecurity and mid-infancy size in rural Bangladesh.                                              | The British journal of nutrition                                  | Na, M.                           | - | + | + | + |  |   | 1 |   |  | 1 | Ineligible |
| 521 | 2020 | Sociodemographic predictors of early postnatal growth: evidence from a Chilean infancy cohort.                                                                            | BMJ open                                                          | Von Holle, A.                    | - | + | + | + |  | 1 |   | 1 |  |   | Ineligible |
| 522 | 2020 | Maternal Socioeconomic Factors and Racial/Ethnic Differences in Neonatal Anthropometry.                                                                                   | International journal of environmental research and public health | Lambert, C.                      | + | - | + | + |  |   | 1 |   |  | 1 | Ineligible |
| 523 | 2020 | Social determinants of overweight and obesity in the mother-child binomial: evidences from Mexico.                                                                        | Archives of public health = Archives belges de sante publique     | Arredondo, A.                    | + | * | - | + |  |   | 1 |   |  | 1 | Ineligible |

|     |      |                                                                                                                                                                      |                                         |                             |   |   |   |   |  |   |   |   |  |   |            |
|-----|------|----------------------------------------------------------------------------------------------------------------------------------------------------------------------|-----------------------------------------|-----------------------------|---|---|---|---|--|---|---|---|--|---|------------|
| 524 | 2020 | Social and economic factors, maternal behaviours in pregnancy and neonatal adiposity in the PANDORA cohort.                                                          | Diabetes research and clinical practice | Longmore, DK.               | + | - | + | + |  |   | 1 |   |  | 1 | Ineligible |
| 525 | 2020 | Determinants of infant and young complementary feeding practices among children 6-23 months of age in urban Pakistan: a multicenter longitudinal study.              | BMC nutrition                           | Ariff, Sh.                  | + | + | - | + |  |   | 1 | 1 |  |   | Ineligible |
| 526 | 2020 | Can shorter mothers have taller children? Nutritional mobility, health equity and the intergenerational transmission of relative height                              | Economics and Human Biology             | Finaret, AB. & Masters, WA. | - | * | + | * |  |   | 1 |   |  | 1 | Ineligible |
| 527 | 2020 | Early Child Care and Weight Status in a Cohort of Predominantly Black Infants in the Southeastern United States                                                      | Childhood Obesity                       | Benjamin-Neelon, SE.        | + | + | + | - |  |   | 1 |   |  | 1 | Ineligible |
| 528 | 2020 | Machine learning model demonstrates stunting at birth and systemic inflammatory biomarkers as predictors of subsequent infant growth – a four-year prospective study | BMC Pediatrics                          | Harrison, E.                | + | + | + | - |  |   | 1 |   |  | 1 | Ineligible |
| 529 | 2020 | Dynamics of stunting from childhood to youthhood in Ethiopia: Evidence from the Young Lives panel data                                                               | PLOS One                                | Astatkie, A.                | * | - | + | * |  |   | 1 | 1 |  |   | Ineligible |
| 530 | 2020 | Nutrition in Pregnancy and Growth in Southwest China (NPGSC) cohort: Design, implementation, and characteristics                                                     | Paediatric and Perinatal Epidemiology   | Zhang, X.                   | * | + | * | - |  |   | 1 |   |  | 1 | Ineligible |
| 531 | 2020 | Association of plasma total cysteine and anthropometric status in 6–30 months old indian children                                                                    | Nutrients                               | Schwinger, C.               | + | + | + | - |  |   | 1 |   |  | 1 | Ineligible |
| 532 | 2020 | Genetic and environmental influences on human height from infancy through adulthood at different levels of parental education                                        | Scientific Reports                      | Jelenkovic A.               | - | + | + | - |  |   | 1 | 1 |  |   | Ineligible |
| 533 | 2020 | Stunting prevalence and its relationship to birth length of 18–23 months old infants in Indonesia                                                                    | Enfermeria Clinica                      | Hastuti                     | + | + | + | - |  |   | 1 |   |  | 1 | Ineligible |
| 534 | 2020 | Trajectory of inequality of opportunity in child height growth: Evidence from the Young Lives study                                                                  | Demographic Research                    | Aizawa, T.                  | * | + | + | - |  |   | 1 |   |  | 1 | Ineligible |
| 535 | 2020 | Environment-wide association study on childhood obesity in the U.S.                                                                                                  | Environmental Research                  | Uche, UI.                   | * | + | + | - |  |   | 1 |   |  | 1 | Ineligible |
| 536 | 2020 | Prenatal air pollution exposure and growth and cardio-metabolic risk in preschoolers                                                                                 | Environment International               | Fossati, S.                 | + | + | + | - |  |   | 1 |   |  | 1 | Ineligible |
| 537 | 2020 | Age-appropriate feeding practices in cambodia and the possible influence on the growth of the children: A longitudinal study                                         | Nutrients                               | Hondru, G.                  | * | - | + | + |  | 1 |   | 1 |  |   | Ineligible |
| 538 | 2020 | A biocultural examination of home food production and child growth in highland Peru                                                                                  | American Journal of Human Biology       | Hoke, MK.                   | * | + | + | - |  |   | 1 |   |  | 1 | Ineligible |
| 539 | 2020 | Association of Risperidone Treatment and Change in BMI in Children Under 5 Years Old: A Retrospective Cohort Study                                                   | Biological Psychiatry                   | Avrahami, M.                | + | * | + | - |  |   | 1 |   |  | 1 | Ineligible |
| 540 | 2020 | Malnutrition in HIV-exposed uninfected children in long-term observational follow-up                                                                                 | Topics in Antiviral Medicine            | Stranix-Chibanda, L.        | + | * | + | - |  |   | 1 |   |  | 1 | Ineligible |
| 541 | 2020 | BMI from birth to age 10 years by types of maternal diabetes during pregnancy                                                                                        | Diabetes                                | Sidell, MA.                 | + | + | + | - |  |   | 1 |   |  | 1 | Ineligible |
| 542 | 2020 | Early Infant Feeding and BMI Trajectories in the First 5 Years of Life                                                                                               | Obesity                                 | Zheng, M.                   | + | + | + | - |  |   | 1 |   |  | 1 | Ineligible |
| 543 | 2020 | Using longitudinal data to understand nutrition and health interactions in rural Gambia                                                                              | Annals of Human Biology                 | Moore, SE.                  | + | * | * | - |  |   | 1 |   |  | 1 | Ineligible |
| 544 | 2020 | Why Who Marries Whom Matters: Effects of Educational Assortative Mating on Infant Health in the United States 1969-1994                                              | Social Forces                           | Rauscher, E.                | + | + | - | + |  |   | 1 | 1 |  |   | Ineligible |
| 545 | 2021 | The excess weight of 0 to 7 year-old children. Risk factors                                                                                                          | Obesity Facts                           | Pereda-Pereda, E.           | + | + | + | - |  |   | 1 |   |  | 1 | Ineligible |

|     |      |                                                                                                                                                                       |                                         |                        |   |   |   |   |  |  |   |  |  |   |                      |
|-----|------|-----------------------------------------------------------------------------------------------------------------------------------------------------------------------|-----------------------------------------|------------------------|---|---|---|---|--|--|---|--|--|---|----------------------|
| 546 | 2021 | 1019 Socioeconomic inequities in 5-year weight trajectories in association with baseline weight-related perceptions: a longitudinal study                             | International Journal of Epidemiology   | Feng, X. & Wilson, A.  | + | * | + | - |  |  | 1 |  |  | 1 | Ineligible           |
| 547 | 2021 | Poor weight gain and its predictors among preterm neonates admitted at Muhimbili National Hospital in Dar-es-salaam, Tanzania: a prospective cohort study             | BMC Pediatrics                          | Ndembo, VP.            | + | + | + | + |  |  | 1 |  |  | 1 | Special group cohort |
| 548 | 2021 | Cord blood metabolic signatures predictive of childhood overweight and rapid growth                                                                                   | International Journal of Obesity        | Handakas E.            | + | + | + | - |  |  | 1 |  |  | 1 | Ineligible           |
| 549 | 2021 | The Biological and Social Determinants of Childhood Obesity: Comparison of 2 Cohorts 50 Years Apart                                                                   | Journal of Pediatrics                   | Robinson, N.           | * | + | + | - |  |  | 1 |  |  | 1 | Ineligible           |
| 550 | 2021 | Linear Growth Trajectories in Early Childhood and Adult Cognitive and Socioemotional Functioning in a Guatemalan Cohort                                               | Journal of Nutrition                    | Ramírez-Luzuriaga, MJ. | + | - | * | * |  |  | 1 |  |  | 1 | Ineligible           |
| 551 | 2021 | Association between perinatal factors, genetic susceptibility to obesity and age at adiposity rebound in children of the EDEN mother-child cohort                     | International Journal of Obesity        | Cisse, AH.             | + | - | + | * |  |  | 1 |  |  | 1 | Ineligible           |
| 552 | 2021 | Are there birth cohort effects in disparities in child obesity by maternal education?                                                                                 | International Journal of Obesity        | Le-Scherban, F.        | * | + | + | + |  |  | 1 |  |  | 1 | Insufficient data    |
| 553 | 2021 | Associations between maternal obesity, gestational cytokine levels and child obesity in the NEST cohort.                                                              | Pediatric obesity                       | Maguire, RL.           | + | * | + | - |  |  | 1 |  |  | 1 | Ineligible           |
| 554 | 2021 | Longitudinal analysis of growth trajectories in young children of Chinese-born immigrant mothers compared with Australian-born mothers living in Victoria, Australia. | BMJ open                                | Bolton, KA.            | + | + | + | - |  |  | 1 |  |  | 1 | Ineligible           |
| 555 | 2021 | Longitudinal outcomes of body mass index in overweight and obese children with chronic kidney disease.                                                                | Pediatric nephrology (Berlin, Germany)  | Rodig, NM.             | + | - | + | + |  |  | 1 |  |  | 1 | Ineligible           |
| 556 | 2021 | Factors affecting the growth of children till the age of three years with overweight whose mothers have diabetes mellitus: A population-based cohort study.           | BMC pediatrics                          | Huang, YD.             | + | + | + | - |  |  | 1 |  |  | 1 | Ineligible           |
| 557 | 2021 | Diarrheal Pathogens Associated with Growth and Neurodevelopment.                                                                                                      | Clinical infectious diseases            | Donowitz JR.           | + | + | + | - |  |  | 1 |  |  | 1 | Ineligible           |
| 558 | 2021 | Maternal and infant prediction of the child BMI trajectories; studies across two generations of Northern Finland birth cohorts.                                       | International journal of obesity (2005) | Nedelec, R.            | + | * | + | - |  |  | 1 |  |  | 1 | Ineligible           |
| 559 | 2021 | Anthropometrics of Estonian children in relation to family disruption: Thrifty phenotype and Trivers-Willard effects.                                                 | Evolution, medicine, and public health  | Valge, M.              | + | * | + | - |  |  | 1 |  |  | 1 | Ineligible           |
| 560 | 2021 | Early childhood weight gain: Latent patterns and body composition outcomes.                                                                                           | Paediatric and perinatal epidemiology   | Norris, T.             | + | + | + | + |  |  | 1 |  |  | 1 | Growth trajectory    |
| 561 | 2021 | Socioeconomic disparities and infancy growth trajectory: a population-based and longitudinal study.                                                                   | BMC pediatrics                          | Shao, ZY.              | + | + | + | + |  |  | 1 |  |  | 1 | Growth trajectory    |
| 562 | 2021 | Maternal Tobacco and Alcohol Use in Relation to Child Malnutrition in Gauteng, South Africa: A Retrospective Analysis.                                                | Children (Basel, Switzerland)           | Modjadji, P.           | - | + | + | * |  |  | 1 |  |  | 1 | Ineligible           |
| 563 | 2021 | Exploring the relationships between wasting and stunting among a cohort of children under two years of age in Niger.                                                  | BMC public health                       | Kohlmann, K.           | - | + | + | + |  |  | 1 |  |  | 1 | Ineligible           |
| 564 | 2021 | Prenatal exposure to ambient air pollutants and early infant growth and adiposity in the Southern California Mother's Milk Study.                                     | Environmental health                    | Patterson, WB.         | + | + | + | - |  |  | 1 |  |  | 1 | Ineligible           |
| 565 | 2021 | Influences on catch-up growth using relative versus absolute metrics: evidence from the MAL-ED cohort study.                                                          | BMC public health                       | Richard, SA.           | + | + | + | - |  |  | 1 |  |  | 1 | Ineligible           |

|     |      |                                                                                                                                                                                                             |                                                                   |                                |   |   |   |   |  |   |   |  |   |                      |
|-----|------|-------------------------------------------------------------------------------------------------------------------------------------------------------------------------------------------------------------|-------------------------------------------------------------------|--------------------------------|---|---|---|---|--|---|---|--|---|----------------------|
| 566 | 2021 | Growth patterns and their contributing factors among HIV-exposed uninfected infants.                                                                                                                        | Maternal & child nutrition                                        | Ndiaye, A.                     | + | * | + | * |  | 1 |   |  | 1 | Special group cohort |
| 567 | 2021 | Off the Charts: Identifying and Visualizing Body Mass Index Trajectories of Rural, Poor Youth.                                                                                                              | The Journal of pediatrics                                         | Rollins, BY.                   | + | + | + | * |  | 1 |   |  | 1 | Growth trajectory    |
| 568 | 2021 | Long-term growth in offspring of infertile parents: A 20-year follow-up study.                                                                                                                              | Acta obstetrica et gynecologica Scandinavica                      | Hinchely Ebdrup, N.            | + | * | + | - |  | 1 |   |  | 1 | Ineligible           |
| 569 | 2021 | High sugar content and body mass index: modelling pathways around the first 1000 d of life, BRISA cohort.                                                                                                   | Public health nutrition                                           | Pinto, DAS.                    | + | + | + | - |  | 1 |   |  | 1 | Ineligible           |
| 570 | 2021 | Spatial Variation of Child Stunting and Maternal Malnutrition after Controlling for Known Risk Factors in a Drought-Prone Rural Community in Southern Ethiopia.                                             | Annals of global health                                           | Belayneh, M.                   | + | - | + | * |  | 1 |   |  | 1 | Ineligible           |
| 571 | 2021 | Gestational weight gain and childhood body mass index across three generations: Results from the 1993 Pelotas (Brazil) Birth Cohort.                                                                        | Pediatric obesity                                                 | Schneider, BC.                 | + | * | + | - |  | 1 |   |  | 1 | Ineligible           |
| 572 | 2021 | Associations between the Mediterranean Diet Pattern and Weight Status and Cognitive Development in Preschool Children.                                                                                      | Nutrients                                                         | Granziera, F.                  | * | - | + | * |  | 1 |   |  | 1 | Ineligible           |
| 573 | 2021 | Common Determinants of Dental Caries and Obesity in Children: A Multi-Ethnic Nested Birth Cohort Study in the United Kingdom.                                                                               | International journal of environmental research and public health | Uerlich, MF.                   | + | + | + | - |  | 1 |   |  | 1 | Ineligible           |
| 574 | 2021 | Complementary Feeding Habits in Children Under the Age of 2 Years Living in the City of Adama in the Oromia Region in Central Ethiopia: Traditional Ethiopian Food Study.                                   | Frontiers in nutrition                                            | Gudeta, AN.                    | + | + | - | - |  | 1 | 1 |  |   | Ineligible           |
| 575 | 2021 | Maternal Smoking During Pregnancy and Offspring Head Growth in Comparison to Height and Weight Growth Up to 6 Years of Age: A Longitudinal Study.                                                           | Clinical epidemiology                                             | Karvonen, M.                   | + | + | + | - |  | 1 |   |  | 1 | Ineligible           |
| 576 | 2021 | Association between parental socioeconomic status and offspring overweight/obesity from the China Family Panel Studies: a longitudinal survey.                                                              | BMJ open                                                          | Ding, S.                       | - | * | + | + |  | 1 |   |  | 1 | Ineligible           |
| 577 | 2021 | Sexual dimorphism in growth pattern among the infants with respect to weight during the first year of life: A longitudinal study                                                                            | Sri Lanka Journal of Child Health                                 | Sinha, NK.                     | + | + | + | - |  | 1 |   |  | 1 | Ineligible           |
| 578 | 2021 | Prenatal exposure to air pollutants and early childhood growth trajectories: A population-based prospective birth cohort study                                                                              | Environmental Research                                            | Tan, Y.                        | + | + | + | + |  | 1 |   |  | 1 | Growth trajectory    |
| 579 | 2021 | Relationship between maternal employment and 9-12 month-old infants' growth indexes in ahwaz (2017)                                                                                                         | Iranian Journal of Epidemiology                                   | Najibi, S.                     | + | + | + | + |  | 1 | 1 |  |   | Growth trajectory    |
| 580 | 2021 | Trajectory of Body Mass Index from Ages 2 to 7 Years and Age at Peak Height Velocity in Boys and Girls                                                                                                      | Journal of Pediatrics                                             | Chen, LK.                      | + | - | + | * |  | 1 |   |  | 1 | Ineligible           |
| 581 | 2021 | Association of maternal depression, family composition and poverty with maternal care and physical health of children in the first year of life                                                             | Journal of Human Growth and Development                           | Scherrer, IRS. & Alves, CRL.   | + | + | - | + |  | 1 |   |  | 1 | Ineligible           |
| 582 | 2021 | Comparison of Postnatal Growth Charts of Singleton Preterm and Term Infants Using World Health Organization Standards at 40–160 Weeks Postmenstrual Age: A Chinese Single-Center Retrospective Cohort Study | Frontiers in Pediatrics                                           | Zhang, L.                      | + | + | + | - |  | 1 |   |  | 1 | Ineligible           |
| 583 | 2021 | Agricultural production diversity and child nutrition in Ethiopia                                                                                                                                           | Food Security                                                     | Bakhtsiyara va, M. & Grace, K. | - | - | + | * |  | 1 |   |  | 1 | Ineligible           |

|     |      |                                                                                                                                                                                                         |                                                                   |                        |   |   |   |   |  |  |   |   |  |   |            |
|-----|------|---------------------------------------------------------------------------------------------------------------------------------------------------------------------------------------------------------|-------------------------------------------------------------------|------------------------|---|---|---|---|--|--|---|---|--|---|------------|
| 584 | 2021 | Childhood growth of term singletons born after frozen compared with fresh embryo transfer                                                                                                               | Reproductive BioMedicine Online                                   | Terho, AM.             | + | + | + | - |  |  | 1 |   |  | 1 | Ineligible |
| 585 | 2021 | Feeding patterns and BMI trajectories during infancy: a multi-ethnic, prospective birth cohort                                                                                                          | BMC Pediatrics                                                    | Sirkka, O.             | + | + | + | - |  |  | 1 |   |  | 1 | Ineligible |
| 586 | 2021 | Weight gain in early years and subsequent body mass index trajectories across birth weight groups: A prospective longitudinal study                                                                     | European Journal of Public Health                                 | Lu, Y.                 | + | + | + | - |  |  | 1 |   |  | 1 | Ineligible |
| 587 | 2021 | The relationship between wasting and stunting in Cambodian children: Secondary analysis of longitudinal data of children below 24 months of age followed up until the age of 59 months                  | PLOS One                                                          | Mutunga, M.            | + | - | + | + |  |  | 1 | 1 |  |   | Ineligible |
| 588 | 2021 | Longitudinal associations between intake of fruit and vegetables and height attainment from preschool to school entry                                                                                   | International Journal of Environmental Research and Public Health | Rosário, R.            | + | - | + | * |  |  | 1 |   |  | 1 | Ineligible |
| 589 | 2021 | Sociodemographic, biological and cultural factors affecting morbidities among infants: A longitudinal study in rural Karnataka                                                                          | Clinical Epidemiology and Global Health                           | Mathad, V.             | + | + | - | + |  |  | 1 |   |  | 1 | Ineligible |
| 590 | 2021 | Infant feeding and growth trajectories in early childhood: the application and comparison of two longitudinal modelling approaches                                                                      | International Journal of Obesity                                  | Zheng, M.              | + | + | + | - |  |  | 1 |   |  | 1 | Ineligible |
| 591 | 2021 | Aflatoxin exposure was not associated with childhood stunting: Results from a birth cohort study in a resource-poor setting of Dhaka, Bangladesh                                                        | Public Health Nutrition                                           | Mahfuz, M.             | + | + | + | - |  |  | 1 |   |  | 1 | Ineligible |
| 592 | 2021 | Effect of Birth Interval on Foetal and Postnatal Child Growth                                                                                                                                           | Scientifica                                                       | Saaka, M. & Aggrey, B. | + | + | + | - |  |  | 1 |   |  | 1 | Ineligible |
| 593 | 2021 | Prenatal dietary diversity may influence underweight in infants in a Ugandan birth-cohort                                                                                                               | Maternal and Child Nutrition                                      | Madzorera I..          | + | + | + | - |  |  | 1 |   |  | 1 | Ineligible |
| 594 | 2021 | Body composition trajectories in HIV-exposed uninfected and HIV-unexposed uninfected infants in Western Kenya                                                                                           | Paediatric and Perinatal Epidemiology                             | Rickman, R.            | + | + | + | - |  |  | 1 |   |  | 1 | Ineligible |
| 595 | 2021 | The effect of blood lipid profiles during pregnancy on longitudinal offspring health                                                                                                                    | Obesity Facts                                                     | Yelverton, C.          | + | + | + | - |  |  | 1 | 1 |  |   | Ineligible |
| 596 | 2021 | RISK FACTORS for MORBIDITY and MORTALITY in VERY LOW BIRTH WEIGHT INFANTS from RURAL VERSUS URBAN COMMUNITIES                                                                                           | Journal of Investigative Medicine                                 | Ondusko, DS.           | + | * | * | - |  |  | 1 |   |  | 1 | Ineligible |
| 597 | 2021 | Cord blood Leptin as a predictor of age at adiposity rebound-the EDEN mother-child cohort                                                                                                               | Obesity Facts                                                     | Cisse, A.              | + | + | + | - |  |  | 1 |   |  | 1 | Ineligible |
| 598 | 2021 | Egyptian Mother's Breast Milk: Protein and Lipid Content in Correlation with Growth of Their Newborns                                                                                                   | QJM                                                               | Shaaban, SY.           | + | + | + | - |  |  | 1 |   |  | 1 | Ineligible |
| 599 | 2021 | Exclusivity of breastfeeding and body composition: learnings from the Baby-bod study                                                                                                                    | International Breastfeeding Journal                               | Jayasinghe, S.         | + | + | + | - |  |  | 1 |   |  | 1 | Ineligible |
| 600 | 2021 | A longitudinal analysis of the effect of maternal region-of-birth on transitions in children's bodyweight status from early childhood to late adolescence in Australia: A population-based cohort study | Preventive Medicine                                               | Hartono, S.            | + | * | + | - |  |  | 1 |   |  | 1 | Ineligible |
| 601 | 2022 | Associations of maternal non-nutritive sweetener intake during pregnancy with offspring body mass index and body fat from birth to adolescence                                                          | International Journal of Obesity                                  | Plows, JF.             | + | + | + | - |  |  | 1 |   |  | 1 | Ineligible |
| 602 | 2022 | Play & Grow: prospective observational cohort of toddlers to inform obesity prevention, Columbus, Ohio, USA.                                                                                            | BMJ open                                                          | Parrott, A.            | + | * | * | - |  |  | 1 |   |  | 1 | Ineligible |



|     |      |                                                                                                                                                                                                                             |                                          |                      |   |   |   |   |  |  |   |  |   |                   |
|-----|------|-----------------------------------------------------------------------------------------------------------------------------------------------------------------------------------------------------------------------------|------------------------------------------|----------------------|---|---|---|---|--|--|---|--|---|-------------------|
| 603 | 2022 | COVID-19-Related Life Experiences, Outdoor Play, and Long-term Adiposity Changes Among Preschool- and School-Aged Children in Singapore 1 Year After Lockdown.                                                              | JAMA pediatrics                          | Sum KK, CS.          | + | + | + | - |  |  | 1 |  | 1 | Ineligible        |
| 604 | 2022 | Association of early migration with child growth, cognition and behaviour in South Africa.                                                                                                                                  | Tropical medicine & international health | Christodoulou J.     | + | * | + | - |  |  | 1 |  | 1 | Ineligible        |
| 605 | 2022 | Influence of Maternal Childhood Trauma on Perinatal Depression, Observed Mother-Infant Interactions, and Child Growth.                                                                                                      | Matern Child Health J.                   | Choi KW.             | + | + | + | - |  |  | 1 |  | 1 | Ineligible        |
| 606 | 2022 | Trends in Weight Gain Among Breastfed Infants Versus Bottle-Fed Infants at a Tertiary Care Hospital in Karachi, Pakistan.                                                                                                   | Cureus.                                  | Bai G                | + | + | + | - |  |  | 1 |  | 1 | Ineligible        |
| 607 | 2022 | Cesarean section and body mass index in children: is there a causal effect?                                                                                                                                                 | Cad Saude Publica.                       | Cavalcante LFP.      | + | + | + | - |  |  | 1 |  | 1 | Ineligible        |
| 608 | 2022 | Mediators of differences by parental education in weight-related outcomes in childhood and adolescence in Norway.                                                                                                           | Sci Rep.                                 | Mekonnen T.          | + | + | + | - |  |  | 1 |  | 1 | Ineligible        |
| 609 | 2022 | Early-life determinants of excessive weight gain among low-income children: Examining the adherence of theoretical frameworks to empirical data using structural equation modelling.                                        | Pediatr Obes.                            | Dourado BLLFS        | + | + | + | + |  |  | 1 |  | 1 | Weight gain       |
| 610 | 2022 | Potentially modifiable mediators for socioeconomic disparities in childhood obesity in the United States.                                                                                                                   | Obesity (Silver Spring)                  | Wen X                | + | - | + | + |  |  | 1 |  | 1 | Ineligible        |
| 611 | 2022 | Linkage Between 2 Information Systems: Combined Live Births and Food and Nutrition Surveillance as a Public Health Tool for Investigation of the Determinants of Obesity Among Children and Adolescents in Southern Brazil. | Food Nutr Bull.                          | Mariante Giesta J    | + | - | + | + |  |  | 1 |  | 1 | Ineligible        |
| 612 | 2022 | Association between hyperglycaemia in pregnancy and growth of offspring in early childhood: The PANDORA study.                                                                                                              | Pediatr Obes.                            | Titmuss A            | + | + | + | - |  |  | 1 |  | 1 | Ineligible        |
| 613 | 2022 | Secular Growth Trends in Early Childhood-Evidence from Two Low-Income Birth Cohorts Recruited over a Decade in Vellore, India.                                                                                              | Am J Trop Med Hyg.                       | Koshy B.             | + | - | + | - |  |  | 1 |  | 1 | Ineligible        |
| 614 | 2022 | Child feeding indexes measuring adherence to New Zealand nutrition guidelines: Development and assessment.                                                                                                                  | Matern Child Nutr.                       | Gontijo de Castro T. | + | + | + | - |  |  | 1 |  | 1 | Ineligible        |
| 615 | 2022 | National, longitudinal NASCITA birth cohort study to investigate the health of Italian children and potential influencing factors.                                                                                          | BMJ Open.                                | Pandolfini C.        | + | + | + | - |  |  | 1 |  | 1 | Ineligible        |
| 616 | 2022 | Socio-economic determinants of child nutrition and growth: a longitudinal study in India.                                                                                                                                   | IASSI-Quarterly                          | Gunjan G.            | - | + | + | + |  |  | 1 |  | 1 | Ineligible        |
| 617 | 2022 | The associations between stunting and wasting at 12 months of age and developmental milestones delays in a cohort of Cambodian children                                                                                     | Scientific Reports                       | Van Beekum M.        | + | + | - | - |  |  | 1 |  | 1 | Ineligible        |
| 618 | 2022 | Longitudinal Study of Growth Variation and Its Determinants in Body Weight of Children Aged 1-15 Years in Ethiopia                                                                                                          | IRANIAN JOURNAL OF PEDIATRICS            | Wake S.              | - | + | + | + |  |  | 1 |  | 1 | Ineligible        |
| 619 | 2022 | Factors Associated With Stunting of Children at 24 Months in the AMANHI Pakistan Study                                                                                                                                      | Current Developments in Nutrition        | Khan DS              | + | + | + | + |  |  | 1 |  | 1 | Insufficient data |
| 620 | 2022 | Factors Associated with Malnutrition among Children Aged Six Months to Five Years in a Semi-Rural Area of the Western Cape, South Africa                                                                                    | Child Care in Practice                   | Loots R.             | - | + | + | + |  |  | 1 |  | 1 | Ineligible        |

|     |      |                                                                                                                                          |                                         |                    |   |   |   |   |  |  |   |  |  |   |                      |
|-----|------|------------------------------------------------------------------------------------------------------------------------------------------|-----------------------------------------|--------------------|---|---|---|---|--|--|---|--|--|---|----------------------|
| 621 | 2022 | A LOGISTIC REGRESSION ANALYSIS OF DETERMINANTS OF CHILD MALNUTRITION IN UTTAR PRADESH, INDIA                                             | Journal of Community Positive Practices | Kumari R.          | - | + | + | + |  |  | 1 |  |  | 1 | Ineligible           |
| 622 | 2022 | Infant appetite and weight gain in early infancy: Moderating effects of controlling feeding styles                                       | Appetite                                | Shriver LH.        | + | - | + | + |  |  | 1 |  |  | 1 | Ineligible¶          |
| 623 | 2023 | Parental determinants associated with early growth after the first year of life by race and ethnicity.                                   | Front Pediatr.                          | Aguayo L.          | + | + | + | + |  |  | 1 |  |  | 1 | Insufficient data    |
| 624 | 2023 | Linking infant size and early growth with maternal lifestyle and breastfeeding - the first year of life in the CRIBS cohort.             | Ann Hum Biol.                           | Šarac J            | + | + | + | + |  |  | 1 |  |  | 1 | Continuous Education |
| 625 | 2023 | Association of Maternal Education With Nutritional Outcomes of Poor Children With Stunting in Indonesia.                                 | Asia Pac J Public Health.               | Handayani NS       | + | - | + | + |  |  | 1 |  |  | 1 | Ineligible           |
| 626 | 2023 | Mapping Concurrent Wasting and Stunting Among Children Under Five in India: A Multilevel Analysis.                                       | Int J Public Health.                    | Khura B.           | - | + | + | + |  |  | 1 |  |  | 1 | Ineligible           |
| 627 | 2023 | Associations between primary healthcare and infant health outcomes: a cohort analysis of low-income mothers in Rio de Janeiro, Brazil.   | Lancet Reg Health Am.                   | Hone T.            | + | + | - | - |  |  | 1 |  |  | 1 | Ineligible           |
| 628 | 2023 | Maternal depressiveness and infant growth outcomes: Findings from the MAASTHI cohort study in India.                                     | J Psychosom Res.                        | Shriyan P.         | + | + | + | - |  |  | 1 |  |  | 1 | Ineligible           |
| 629 | 2023 | Longitudinal trends and determinants of stunting among children aged 1-15 years.                                                         | Arch Public Health.                     | Wake SK            | + | - | + | + |  |  | 1 |  |  | 1 | Ineligible           |
| 630 | 2023 | African American mothers' perceptions of infant body size are prospectively associated with infant growth and BMI.                       | Am J Hum Biol.                          | Rothman J.         | + | + | + | - |  |  | 1 |  |  | 1 | Ineligible           |
| 631 | 2023 | National, longitudinal NASCITA birth cohort study: prevalence of overweight at 12 months of age in children born healthy.                | BMJ Paediatr Open.                      | Clavenna A.        | + | + | + | - |  |  | 1 |  |  | 1 | Ineligible           |
| 632 | 2023 | Influence of maternal age on birth and infant outcomes at 6 months: a cohort study with quantitative bias analysis.                      | Int J Epidemiol.                        | Gebreegzia bher E. | + | + | + | - |  |  | 1 |  |  | 1 | Ineligible           |
| 633 | 2023 | Cardiometabolic risk profile among children with migrant parents and role of parental education: the IDEFICS/I.Family cohort.            | Int J Obes (Lond)                       | Lindblad A.        | + | + | + | - |  |  | 1 |  |  | 1 | Ineligible           |
| 634 | 2023 | Association between sleep duration and latency, nocturnal awakenings, and body mass index among infants.                                 | Rev Paul Pediatr.                       | Oliveira PMB       | + | + | + | - |  |  | 1 |  |  | 1 | Ineligible           |
| 635 | 2023 | Ultra-Processed Food as Mediator of the Association between Birthweight and Childhood Body Weight Outcomes: A Retrospective Cohort Study | Nutrients                               | Hou M.             | + | - | + | + |  |  | 1 |  |  | 1 | Ineligible           |
| 636 | 2023 | Relationship between Birth Order and Postnatal Growth until 4 Years of Age: The Japan Environment and Children's Study                   | Children                                | Yoshida A.         | + | + | + | - |  |  | 1 |  |  | 1 | Ineligible           |
| 637 | 2023 | Infant body composition at 6 and 24 months: what are the driving factors?                                                                | European Journal of Clinical Nutrition  | Santos IS.         | + | + | + | - |  |  | 1 |  |  | 1 | Ineligible           |
| 638 | 2023 | Association between Meal Frequency and Weight Status in Spanish Children: A Prospective Cohort Study                                     | Nutrients                               | Juton C.           | + | + | + | - |  |  | 1 |  |  | 1 | Ineligible           |
| 639 | 2023 | Association and potential mediators between socioeconomic status and childhood obesity in China: findings from a national cohort study   | Global Health Journal                   | Zhou H.            | + | - | + | + |  |  | 1 |  |  | 1 | Ineligible           |
| 640 | 2024 | Obesity Prevention in Early Life (OPEL) study: linking longitudinal data to capture obesity risk in the first 1000 days                  | BMJ NUTRITION, PREVENTION & HEALTH      | Cheng E.           | + | + | + | - |  |  | 1 |  |  | 1 | Ineligible           |

\*I: Include; B: Borderline; E: Exclude.

¶ The authors calculated rapid weight gain between birth and various child ages (ranging from 6 to 11 months), employing a methodology similar to that of cross-sectional studies.
