# Supplementary material for: Maternal education and its influence on child growth and nutritional status during the first two years of life: a systematic review and meta-analysis
Source: PubMed Central journal article supplement (PMC11001623; doi:10.1016/j.eclinm.2024.102574), 2024-04-04
Supplement: mmc5.pdf [file mmc5.pdf]

Supplementary 5. Quality assessment of included studies using Newcastle-Ottawa scale adapted for cohort studies.

| Indicator   | Author            | Selection                                   |                                        |                              |                                                                             | Comparability                                                      |                          | Outcome                                            |                                     | Quality |
|-------------|-------------------|---------------------------------------------|----------------------------------------|------------------------------|-----------------------------------------------------------------------------|--------------------------------------------------------------------|--------------------------|----------------------------------------------------|-------------------------------------|---------|
|             |                   | 1. Representativeness of the exposed cohort | 2. Selection of the non-exposed cohort | 3. Ascertainment of exposure | 4. Demonstration that outcome of interest was not present at start of study | 1. Comparability of cohorts on the basis of the design or analysis | 1. Assessment of outcome | 2. Was follow up long enough for outcomes to occur | 3. Adequacy of follow up of cohorts |         |
| WAZ*        | Grjibovski AM     | 1                                           | 1                                      | 1                            | 1                                                                           | 2                                                                  | 1                        | 1                                                  | 1                                   | good    |
|             | Mesman I          | 1                                           | 1                                      | 0                            | 0                                                                           | 0                                                                  | 1                        | 1                                                  | 0                                   | poor    |
|             | Hui LL            | 1                                           | 1                                      | 0                            | 0                                                                           | 2                                                                  | 2                        | 1                                                  | 1                                   | good    |
|             | van Rossem L      | 1                                           | 1                                      | 1                            | 0                                                                           | 0                                                                  | 1                        | 1                                                  | 0                                   | poor    |
|             | Chen YJ           | 1                                           | 1                                      | 1                            | 1                                                                           | 2                                                                  | 1                        | 1                                                  | 0                                   | good    |
|             | Hong SA           | 1                                           | 1                                      | 1                            | 0                                                                           | 1                                                                  | 1                        | 1                                                  | 1                                   | good    |
|             | Kachi Y,2001      | 1                                           | 1                                      | 0                            | 0                                                                           | 0                                                                  | 1                        | 1                                                  | 0                                   | poor    |
|             | Kachi Y,2011      | 1                                           | 1                                      | 0                            | 0                                                                           | 0                                                                  | 1                        | 1                                                  | 0                                   | poor    |
|             | Ballon M          | 1                                           | 1                                      | 0                            | 0                                                                           | 1                                                                  | 1                        | 1                                                  | 1                                   | fair    |
|             | Mekonnen T        | 1                                           | 1                                      | 0                            | 0                                                                           | 2                                                                  | 1                        | 1                                                  | 0                                   | fair    |
| HAZ*        | Grjibovski AM     | 1                                           | 1                                      | 1                            | 1                                                                           | 2                                                                  | 1                        | 1                                                  | 1                                   | good    |
|             | Mesman I          | 1                                           | 1                                      | 0                            | 0                                                                           | 2                                                                  | 1                        | 1                                                  | 0                                   | good    |
|             | van Rossem L      | 1                                           | 1                                      | 1                            | 0                                                                           | 0                                                                  | 1                        | 1                                                  | 0                                   | poor    |
|             | Matijasevich A    | 1                                           | 1                                      | 1                            | 1                                                                           | 0                                                                  | 1                        | 1                                                  | 1                                   | poor    |
|             | Howe LD           | 1                                           | 1                                      | 0                            | 0                                                                           | 0                                                                  | 1                        | 1                                                  | 1                                   | poor    |
|             | Silva LM          | 1                                           | 1                                      | 1                            | 0                                                                           | 2                                                                  | 1                        | 1                                                  | 0                                   | good    |
|             | Chen YJ           | 1                                           | 1                                      | 1                            | 1                                                                           | 2                                                                  | 1                        | 1                                                  | 1                                   | good    |
|             | Hong SA           | 1                                           | 1                                      | 1                            | 0                                                                           | 1                                                                  | 1                        | 1                                                  | 1                                   | good    |
|             | Ballon M          | 1                                           | 1                                      | 0                            | 0                                                                           | 1                                                                  | 1                        | 1                                                  | 1                                   | fair    |
|             | Dal Bom JP        | 1                                           | 1                                      | 1                            | 0                                                                           | 1                                                                  | 1                        | 1                                                  | 0                                   | fair    |
|             | Mekonnen T        | 1                                           | 1                                      | 0                            | 0                                                                           | 2                                                                  | 1                        | 1                                                  | 0                                   | fair    |
|             | Diana A           | 1                                           | 1                                      | 1                            | 1                                                                           | 2                                                                  | 1                        | 1                                                  | 1                                   | good    |
|             | Howe LD           | 1                                           | 1                                      | 0                            | 0                                                                           | 0                                                                  | 2                        | 1                                                  | 0                                   | poor    |
| BMIZ*       | Mesman I          | 1                                           | 1                                      | 0                            | 0                                                                           | 0                                                                  | 1                        | 1                                                  | 0                                   | poor    |
|             | van Rossem L      | 1                                           | 1                                      | 1                            | 0                                                                           | 2                                                                  | 1                        | 1                                                  | 0                                   | good    |
|             | Silva LM          | 1                                           | 1                                      | 1                            | 0                                                                           | 0                                                                  | 1                        | 1                                                  | 1                                   | poor    |
|             | Morgen CS         | 1                                           | 1                                      | 1                            | 0                                                                           | 0                                                                  | 1                        | 1                                                  | 1                                   | poor    |
|             | Ballon M          | 1                                           | 1                                      | 0                            | 0                                                                           | 1                                                                  | 1                        | 1                                                  | 1                                   | fair    |
|             | McCrary C, G21    | 1                                           | 1                                      | 1                            | 0                                                                           | 0                                                                  | 1                        | 1                                                  | 1                                   | poor    |
|             | McCrary C(GUI)    | 1                                           | 1                                      | 1                            | 0                                                                           | 0                                                                  | 1                        | 1                                                  | 1                                   | poor    |
|             | Dal Bom JP        | 1                                           | 1                                      | 1                            | 0                                                                           | 1                                                                  | 1                        | 1                                                  | 0                                   | fair    |
|             | Mekonnen T        | 1                                           | 1                                      | 0                            | 0                                                                           | 2                                                                  | 1                        | 1                                                  | 0                                   | fair    |
|             | van Rossem L      | 1                                           | 1                                      | 1                            | 0                                                                           | 2                                                                  | 1                        | 1                                                  | 0                                   | good    |
| Overweight  | Anderson SE       | 1                                           | 1                                      | 0                            | 0                                                                           | 0                                                                  | 1                        | 1                                                  | 0                                   | poor    |
|             | Mastroeni MF      | 0                                           | 1                                      | 1                            | 0                                                                           | 2                                                                  | 1                        | 1                                                  | 0                                   | fair    |
|             | Feldman-Winter L  | 0                                           | 1                                      | 1                            | 0                                                                           | 0                                                                  | 1                        | 1                                                  | 0                                   | poor    |
|             | Ballon M          | 1                                           | 1                                      | 0                            | 0                                                                           | 1                                                                  | 1                        | 1                                                  | 1                                   | fair    |
|             | Rotevatn TA       | 1                                           | 1                                      | 1                            | 0                                                                           | 2                                                                  | 1                        | 1                                                  | 0                                   | good    |
|             | Shay M            | 1                                           | 1                                      | 0                            | 0                                                                           | 0                                                                  | 0                        | 1                                                  | 1                                   | poor    |
|             | Xinmei Chen       | 1                                           | 1                                      | 0                            | 0                                                                           | 0                                                                  | 1                        | 1                                                  | 1                                   | poor    |
|             | Mekonnen T        | 1                                           | 1                                      | 0                            | 0                                                                           | 2                                                                  | 1                        | 1                                                  | 0                                   | poor    |
|             | Zhou S            | 0                                           | 1                                      | 1                            | 0                                                                           | 0                                                                  | 1                        | 1                                                  | 0                                   | poor    |
|             | Mamabolo RL       | 0                                           | 1                                      | 1                            | 0                                                                           | 0                                                                  | 1                        | 1                                                  | 0                                   | poor    |
| Underweight | Wightkin J        | 1                                           | 1                                      | 1                            | 0                                                                           | 0                                                                  | 1                        | 1                                                  | 0                                   | poor    |
|             | Mondal D          | 0                                           | 1                                      | 1                            | 1                                                                           | 2                                                                  | 1                        | 1                                                  | 1                                   | good    |
|             | Hong SA           | 1                                           | 1                                      | 1                            | 0                                                                           | 1                                                                  | 1                        | 1                                                  | 1                                   | good    |
|             | Mamabolo RL       | 0                                           | 1                                      | 2                            | 0                                                                           | 0                                                                  | 1                        | 1                                                  | 0                                   | poor    |
| Stunting    | Willey, Barbara A | 1                                           | 1                                      | 1                            | 1                                                                           | 2                                                                  | 1                        | 1                                                  | 0                                   | good    |
|             | LL Jones          | 1                                           | 1                                      | 0                            | 1                                                                           | 2                                                                  | 1                        | 1                                                  | 0                                   | fair    |
|             | Mongkolchati A    | 1                                           | 1                                      | 1                            | 1                                                                           | 2                                                                  | 1                        | 1                                                  | 1                                   | good    |
|             | Mondal D          | 0                                           | 1                                      | 1                            | 0                                                                           | 2                                                                  | 1                        | 1                                                  | 1                                   | good    |
|             | Slemming W.       | 1                                           | 1                                      | 1                            | 0                                                                           | 0                                                                  | 1                        | 1                                                  | 0                                   | poor    |
|             | Hong SA           | 1                                           | 1                                      | 1                            | 0                                                                           | 1                                                                  | 1                        | 1                                                  | 1                                   | good    |
|             | Das S             | 0                                           | 1                                      | 1                            | 0                                                                           | 0                                                                  | 1                        | 1                                                  | 1                                   | poor    |

W\*  
RWG\*

|                   |   |   |   |   |   |   |   |   |      |
|-------------------|---|---|---|---|---|---|---|---|------|
| Mamabolo RL       | 0 | 1 | 1 | 0 | 0 | 1 | 1 | 0 | poor |
| Hong SA           | 1 | 1 | 1 | 0 | 1 | 1 | 1 | 1 | good |
| Karaolis-Danckert | 0 | 1 | 1 | 1 | 0 | 1 | 1 | 0 | poor |
| Mendez MA         | 1 | 1 | 1 | 1 | 0 | 1 | 1 | 1 | poor |
| Criswell R        | 0 | 1 | 0 | 1 | 0 | 0 | 1 | 1 | poor |
| Rotevatn TA       | 1 | 1 | 1 | 1 | 0 | 1 | 1 | 0 | poor |

\* The numbers represent the number of stars assigned to each domain. WAZ: Weight for age z-score; HAZ: Height for age z-score; BMIZ: BMI for age z-score; W: Wasting; RWG: Rapid weight gain.
