# Supplementary material for: Maternal education and its influence on child growth and nutritional status during the first two years of life: a systematic review and meta-analysis
Source: PubMed Central journal article supplement (PMC11001623; doi:10.1016/j.eclinm.2024.102574), 2024-04-04

**Supplementary 7. Leave-one-out sensitivity analysis results.**

➤ **WAZ**

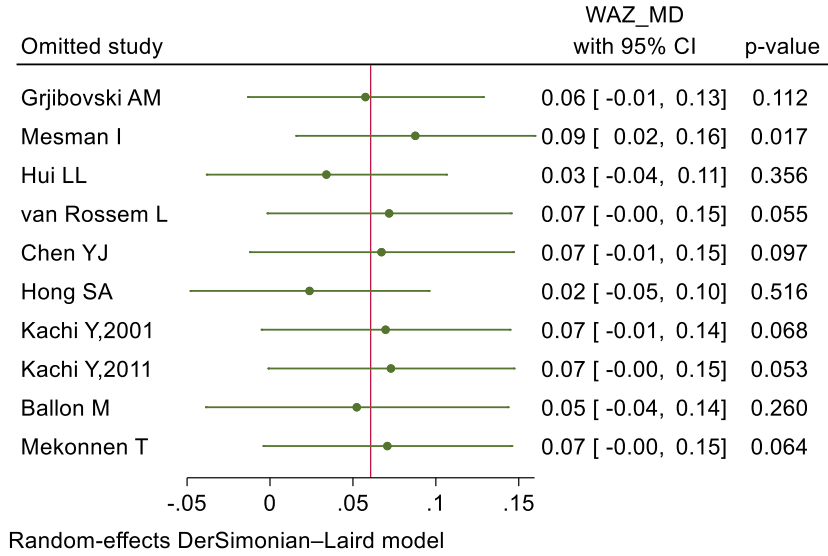

➤ **HAZ**

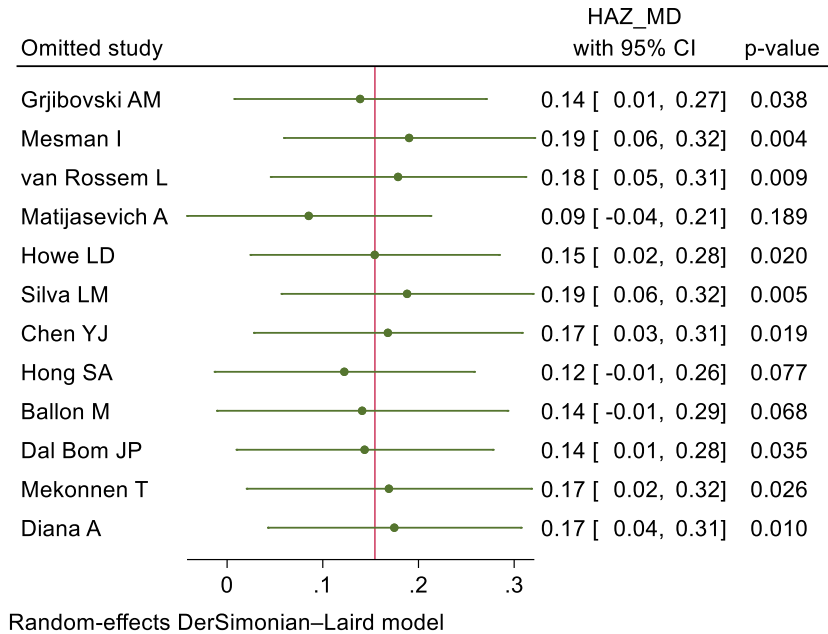

➤ **BMI z-score**

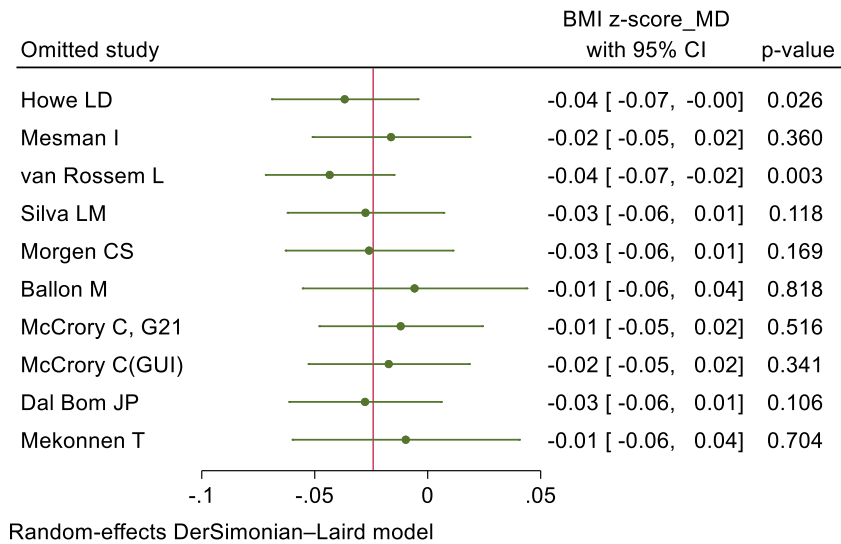

➤ **Overweight**

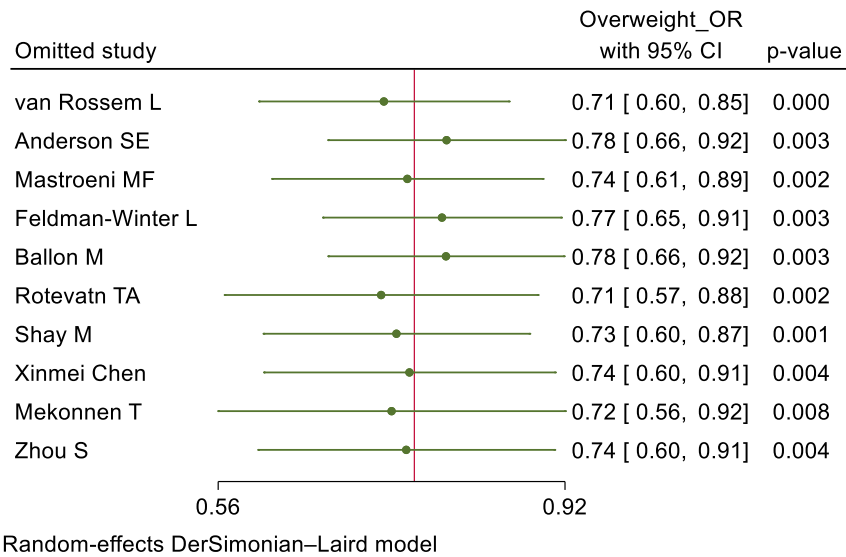

➤ **Underweight**

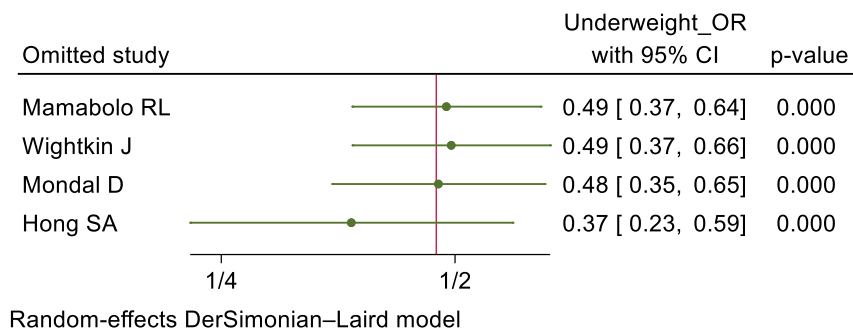

➤ **Stunting**

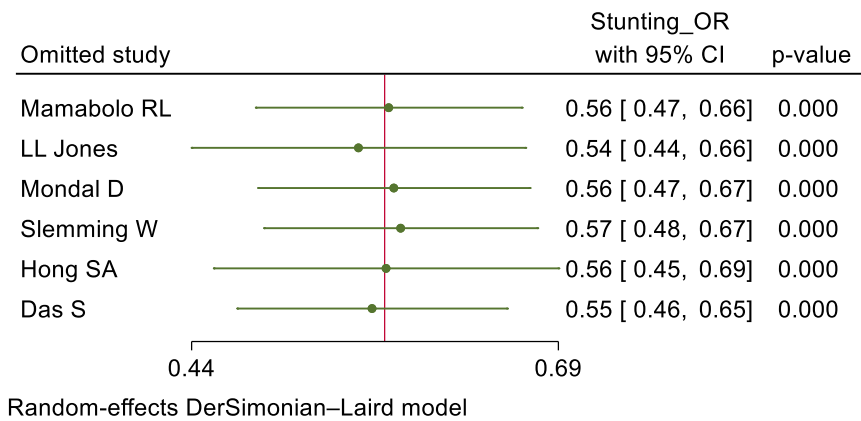

➤ **Rapid weight gain**

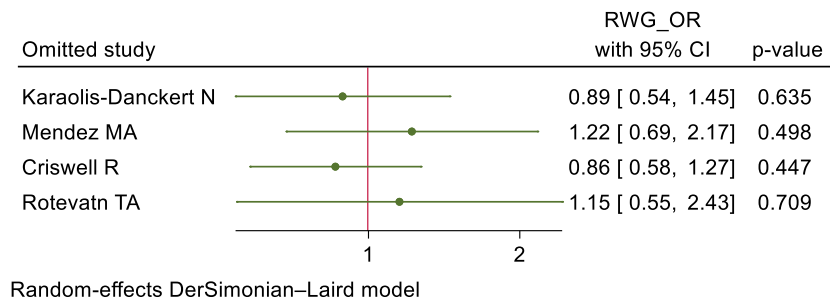

Supplement: mmc7.pdf [file mmc7.pdf]
