# Supplementary material for: Maternal education and its influence on child growth and nutritional status during the first two years of life: a systematic review and meta-analysis
Source: PubMed Central journal article supplement (PMC11001623; doi:10.1016/j.eclinm.2024.102574), 2024-04-04
Supplement: mmc8.pdf [file mmc8.pdf]

**Supplementary 8. Publication bias.**

➤ **WAZ**

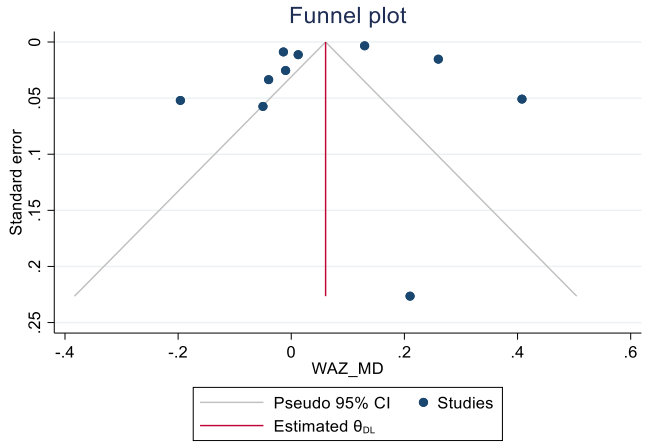

| <i>test</i>  | <i>p-value</i> |
|--------------|----------------|
| <b>Begg</b>  | 0.7205         |
| <b>Egger</b> | 0.8351         |

| STUDIES                   | WAZ(MD) | 95% CI          |
|---------------------------|---------|-----------------|
| <b>OBSERVED</b>           | 0.061   | -0.009 to 0.131 |
| <b>OBSERVED + IMPUTED</b> | 0.061   | -0.009 to 0.131 |

➤ **HAZ**

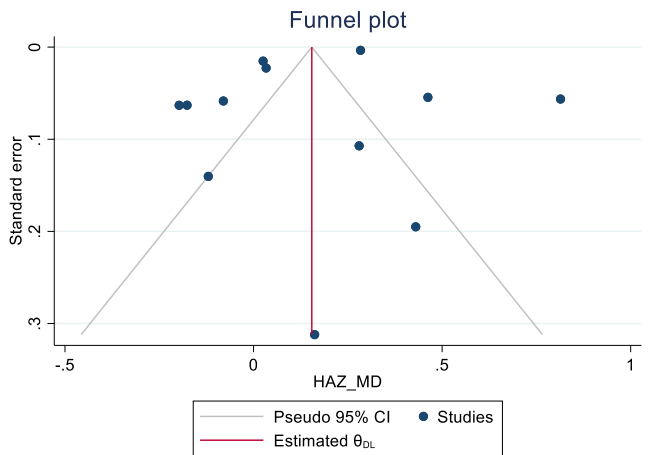

| <i>test</i>  | <i>p-value</i> |
|--------------|----------------|
| <b>Begg</b>  | 0.8370         |
| <b>Egger</b> | 0.8606         |

| STUDIES                   | HAZ(MD) | 95% CI         |
|---------------------------|---------|----------------|
| <b>OBSERVED</b>           | 0.154   | 0.027 to 0.282 |
| <b>OBSERVED + IMPUTED</b> | 0.154   | 0.027 to 0.282 |

➤ **BMI z-score**

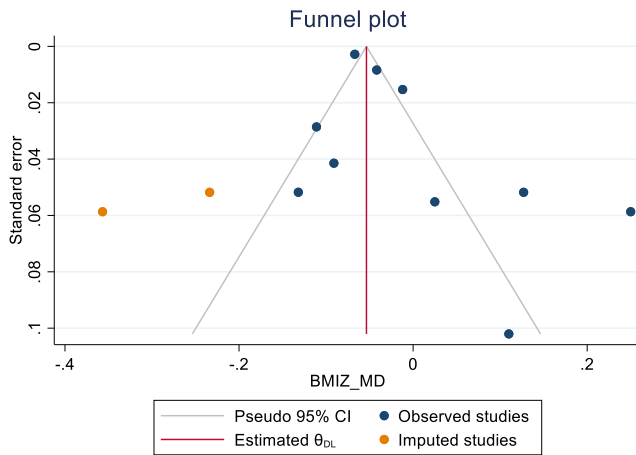

| <i>test</i>  | <i>p-value</i> |
|--------------|----------------|
| <b>Begg</b>  | 0.1524         |
| <b>Egger</b> | 0.0077         |

| STUDIES                   | BMI Z-SCORE (MD) | 95% CI           |
|---------------------------|------------------|------------------|
| <b>OBSERVED</b>           | -0.024           | -0.058 to 0.009  |
| <b>OBSERVED + IMPUTED</b> | -0.054           | -0.090 to -0.017 |

➤ **Overweight**

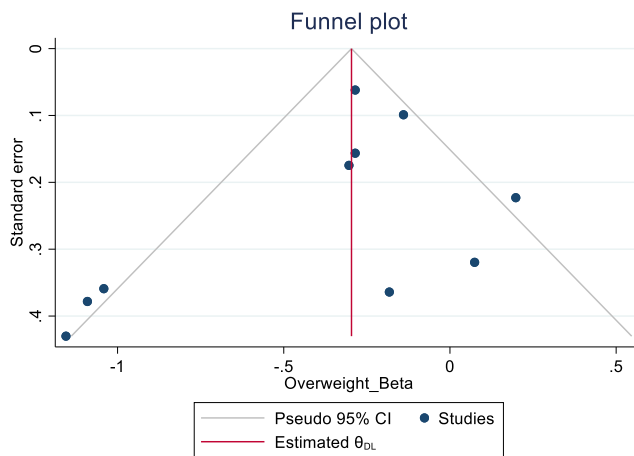

| <i>test</i>  | <i>p-value</i> |
|--------------|----------------|
| <b>Begg</b>  | 0.2831         |
| <b>Egger</b> | 0.0756         |

| STUDIES                   | OVERWEIGHT(OR) | 95% CI         |
|---------------------------|----------------|----------------|
| <b>OBSERVED</b>           | 0.744          | 0.621 to 0.890 |
| <b>OBSERVED + IMPUTED</b> | 0.744          | 0.621 to 0.890 |

➤ Underweight

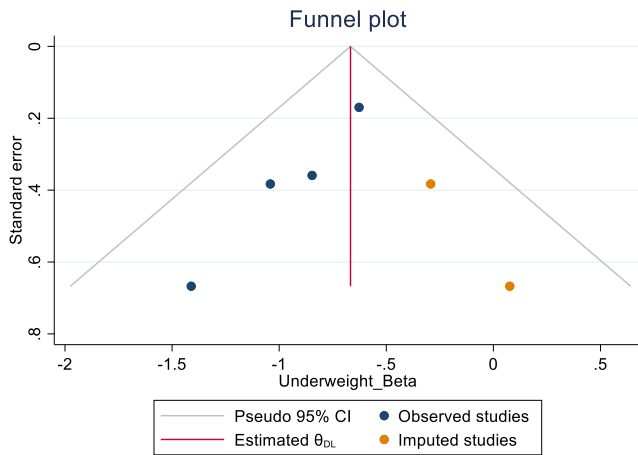

| <i>test</i>  | <i>p-value</i> |
|--------------|----------------|
| <b>Begg</b>  | 0.0894         |
| <b>Egger</b> | 0.1506         |

STUDIES                      □                      UNDERWEIGHT(OR)                      95% CI

|                           |       |                |
|---------------------------|-------|----------------|
| <b>OBSERVED</b>           | 0.473 | 0.360 to 0.621 |
| <b>OBSERVED + IMPUTED</b> | 0.513 | 0.399 to 0.660 |

➤ Stunting

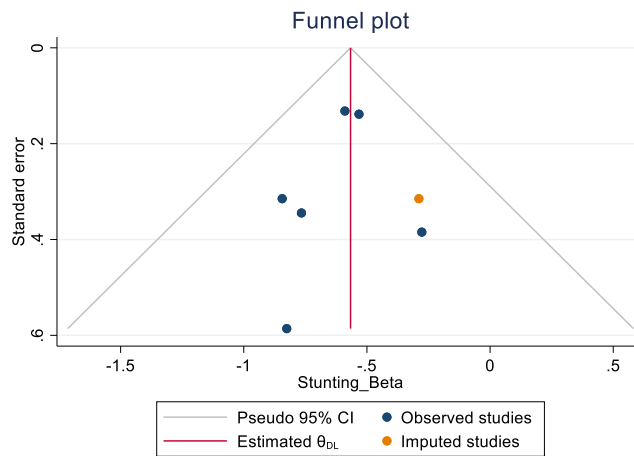

| <i>test</i>  | <i>p-value</i> |
|--------------|----------------|
| <b>Begg</b>  | 1              |
| <b>Egger</b> | 0.6337         |

| STUDIES                   | STUNTING(OR) | 95% CI         |
|---------------------------|--------------|----------------|
| <b>OBSERVED</b>           | 0.556        | 0.471 to 0.657 |
| <b>OBSERVED + IMPUTED</b> | 0.568        | 0.483 to 0.667 |

➤ **Rapid weight gain**

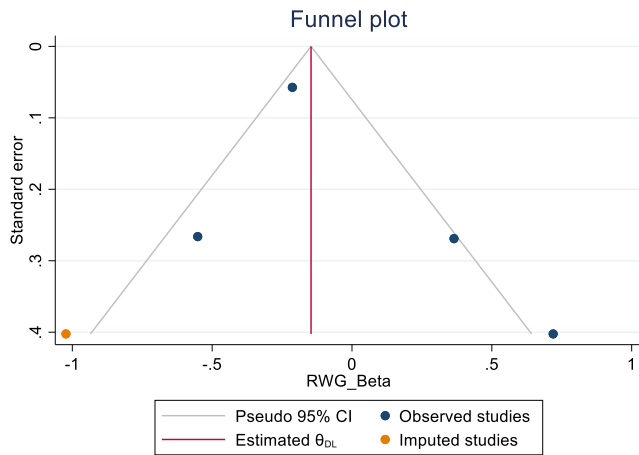

| <i>test</i>  | <i>p-value</i> |
|--------------|----------------|
| <b>Begg</b>  | 0.0894         |
| <b>Egger</b> | 0.3305         |

| <b>STUDIES</b>            | <b>RWG(OR)</b> | <b>95% CI</b>  |
|---------------------------|----------------|----------------|
| <b>OBSERVED</b>           | 0.997          | 0.648 to 1.534 |
| <b>OBSERVED + IMPUTED</b> | 0.864          | 0.565 to 1.320 |
